# Supplementary material for: Manganese-catalyzed transfer semihydrogenation of internal alkynes to E-alkenes with iPrOH as hydrogen source
Source: Royal Society of Chemistry journal article supplement (doi:10.1039/d2cy00246a), 2022-01-01
Supplement: d2cy00246a1.pdf [file d2cy00246a1.pdf]

## Supporting Information

### **Manganese-Catalyzed Transfer Semihydrogenation of Internal Alkynes to *E*- Alkenes with iPrOH as Hydrogen Source**

Antonio Torres-Calis and Juventino J. García\*

juvent@unam.mx

*Facultad de Química, Universidad Nacional Autónoma de México, Mexico City, 04510, Mexico*

## Index

|      |                                                                                                                       |     |
|------|-----------------------------------------------------------------------------------------------------------------------|-----|
| I.   | Characterization of prepared Mn(I) complexes                                                                          | S1  |
| II.  | Optimization of E-selective transfer semihydrogenation of diphenylacetylene ( <b>1</b> ) using Mn(I)-based precursors | S11 |
| III. | Scope                                                                                                                 | S16 |
| IV.  | Mechanistic insights                                                                                                  | S57 |

## Index of Figures

|                    |                                                                                                                                      |     |
|--------------------|--------------------------------------------------------------------------------------------------------------------------------------|-----|
| <b>Figure S1.</b>  | $^{31}\text{P}\{^1\text{H}\}$ NMR (243 MHz, THF- $d_8$ ) spectrum for <b>Mn-1</b>                                                    | S1  |
| <b>Figure S2.</b>  | $^1\text{H}$ NMR (600 MHz, THF- $d_8$ ) spectrum for <b>Mn-1</b>                                                                     | S1  |
| <b>Figure S3.</b>  | FTIR (ATR) spectrum for <b>Mn-1</b>                                                                                                  | S2  |
| <b>Figure S4.</b>  | $^{31}\text{P}\{^1\text{H}\}$ NMR (243 MHz, THF- $d_8$ ) spectrum for <b>Mn-2</b>                                                    | S3  |
| <b>Figure S5.</b>  | $^1\text{H}$ NMR (600 MHz, THF- $d_8$ ) spectrum for <b>Mn-2</b>                                                                     | S3  |
| <b>Figure S6.</b>  | FTIR (ATR) spectrum for <b>Mn-2</b>                                                                                                  | S4  |
| <b>Figure S7.</b>  | $^{31}\text{P}\{^1\text{H}\}$ NMR (243 MHz, THF- $d_8$ ) spectrum for <b>Mn-3</b>                                                    | S5  |
| <b>Figure S8.</b>  | $^1\text{H}$ NMR (600 MHz, THF- $d_8$ ) spectrum for <b>Mn-3</b>                                                                     | S5  |
| <b>Figure S9.</b>  | FTIR (ATR) spectrum for <b>Mn-3</b>                                                                                                  | S6  |
| <b>Figure S10.</b> | $^{31}\text{P}\{^1\text{H}\}$ NMR (243 MHz, THF- $d_8$ ) spectrum for <b>Mn-4</b>                                                    | S7  |
| <b>Figure S11.</b> | $^1\text{H}$ NMR (600 MHz, THF- $d_8$ ) spectrum for <b>Mn-4</b>                                                                     | S7  |
| <b>Figure S12.</b> | FTIR (ATR) spectrum for <b>Mn-4</b>                                                                                                  | S8  |
| <b>Figure S13.</b> | $^{31}\text{P}\{^1\text{H}\}$ NMR (243 MHz, THF- $d_8$ ) spectrum for <b>Mn-5</b>                                                    | S9  |
| <b>Figure S14.</b> | $^1\text{H}$ NMR (600 MHz, THF- $d_8$ ) spectrum for <b>Mn-5</b>                                                                     | S9  |
| <b>Figure S15.</b> | FTIR (ATR) spectrum for <b>Mn-5</b>                                                                                                  | S10 |
| <b>Figure S16.</b> | Typical GC of the crude mixture for <b>1</b> transfer semihydrogenation with iPrOH catalyzed by <b>Mn-2</b>                          | S13 |
| <b>Figure S17.</b> | MS for diphenylacetylene ( <b>1</b> ) detected by GC                                                                                 | S13 |
| <b>Figure S18.</b> | MS for <i>cis</i> -stilbene ( <b>1b</b> ) detected by GC                                                                             | S14 |
| <b>Figure S19.</b> | MS for <i>trans</i> -stilbene ( <b>1a</b> ) detected by GC                                                                           | S14 |
| <b>Figure S20.</b> | MS for 4-methylpent-3-en-2-one detected by GC                                                                                        | S15 |
| <b>Figure S21.</b> | MS for 4-methylpent-3-en-2-ol detected by GC                                                                                         | S15 |
| <b>Figure S22.</b> | GC of the crude mixture of 4-(phenylethynyl)benzaldehyde ( <b>2</b> ) transfer semihydrogenation with iPrOH catalyzed by <b>Mn-2</b> | S16 |
| <b>Figure S23.</b> | MS for 4-(phenylethynyl)benzaldehyde ( <b>2</b> ) detected by GC                                                                     | S16 |
| <b>Figure S24.</b> | MS for ( <i>E</i> )-4-styrylbenzaldehyde ( <b>2a</b> ) detected by GC                                                                | S17 |
| <b>Figure S25.</b> | MS for ( <i>Z</i> )-4-styrylbenzaldehyde ( <b>2b</b> ) detected by GC                                                                | S17 |
| <b>Figure S26.</b> | MS for (4-styrylphenyl)methanol detected by GC                                                                                       | S18 |
| <b>Figure S27.</b> | MS for 1-(4-(phenylethynyl)phenyl)but-2-ene-1,3-diol detected by GC                                                                  | S18 |

|                                                                                                                                                                                                     |     |
|-----------------------------------------------------------------------------------------------------------------------------------------------------------------------------------------------------|-----|
| <b>Figure S28.</b> MS for 4-(4-(phenylethynyl)phenyl)but-3-en-2-one detected by GC                                                                                                                  | S19 |
| <b>Figure S29.</b> GC of the crude mixture of 1,2,3-trifluoro-4-(phenylethynyl)benzene ( <b>3</b> ) transfer semihydrogenation with iPrOH catalyzed by <b>Mn-2</b>                                  | S19 |
| <b>Figure S30.</b> GC of the crude mixture of 1,2,3-trifluoro-4-(phenylethynyl)benzene ( <b>3</b> ) transfer semihydrogenation with iPrOH catalyzed by <b>Mn-2</b> after heating at 100 °C for 16 h | S20 |
| <b>Figure S31.</b> MS for 1,2,3-trifluoro-4-(phenylethynyl)benzene ( <b>3</b> ) detected by GC                                                                                                      | S20 |
| <b>Figure S32.</b> MS for ( <i>E</i> )-1,2,3-trifluoro-4-styrylbenzene ( <b>3a</b> ) detected by GC                                                                                                 | S21 |
| <b>Figure S33.</b> MS for ( <i>Z</i> )-1,2,3-trifluoro-4-styrylbenzene ( <b>3b</b> ) detected by GC                                                                                                 | S21 |
| <b>Figure S34.</b> GC of the crude mixture of 1-nitro-4-(phenylethynyl)benzene ( <b>4</b> ) transfer semihydrogenation with iPrOH catalyzed by <b>Mn-2</b>                                          | S22 |
| <b>Figure S35.</b> MS for 1-nitro-4-(phenylethynyl)benzene ( <b>4</b> ) detected by GC                                                                                                              | S22 |
| <b>Figure S36.</b> MS for ( <i>E</i> )-1-nitro-4-styrylbenzene ( <b>4a</b> ) detected by GC                                                                                                         | S23 |
| <b>Figure S37.</b> MS for ( <i>Z</i> )-1-nitro-4-styrylbenzene ( <b>4b</b> ) detected by GC                                                                                                         | S23 |
| <b>Figure S38.</b> MS for 4-(phenylethynyl)aniline detected by GC                                                                                                                                   | S24 |
| <b>Figure S39.</b> GC of the crude mixture of 4-fluoro-4'-(phenylethynyl)-benzophenone ( <b>5</b> ) transfer semihydrogenation with iPrOH catalyzed by <b>Mn-2</b>                                  | S24 |
| <b>Figure S40.</b> GC of the crude mixture of 4-fluoro-4'-(phenylethynyl)-benzophenone ( <b>5</b> ) transfer semihydrogenation with iPrOH catalyzed by <b>Mn-2</b> after heating at 100 °C for 16 h | S25 |
| <b>Figure S41.</b> MS for 4-fluoro-4'-(phenylethynyl)-benzophenone ( <b>5</b> ) detected by GC                                                                                                      | S25 |
| <b>Figure S42.</b> MS for ( <i>E</i> )-(4-fluorophenyl)(4-styrylphenyl)methanol ( <b>5a</b> ) detected by GC                                                                                        | S26 |
| <b>Figure S43.</b> MS for ( <i>Z</i> )-(4-fluorophenyl)(4-styrylphenyl)methanol ( <b>5b</b> ) detected by GC                                                                                        | S26 |
| <b>Figure S44.</b> MS for ( <i>E</i> )-(4-fluorophenyl)(4-styrylphenyl)methanone ( <b>5a'</b> ) detected by GC                                                                                      | S27 |
| <b>Figure S45.</b> MS for ( <i>Z</i> )-(4-fluorophenyl)(4-styrylphenyl)methanone ( <b>5b'</b> ) detected by GC                                                                                      | S27 |
| <b>Figure S46.</b> MS for (4-fluorophenyl)(4-(phenylethynyl)phenyl)methanol detected by GC                                                                                                          | S28 |
| <b>Figure S47.</b> MS for (4-phenethylphenyl)(phenyl)methanol detected by GC                                                                                                                        | S28 |
| <b>Figure S48.</b> GC of the crude mixture of 1-methyl-4-(phenylethynyl)benzene ( <b>6</b> ) transfer semihydrogenation with iPrOH catalyzed by <b>Mn-2</b>                                         | S29 |
| <b>Figure S49.</b> MS for 1-methyl-4-(phenylethynyl)benzene ( <b>6</b> ) detected by GC                                                                                                             | S29 |
| <b>Figure S50.</b> MS for ( <i>E</i> )-1-methyl-4-styrylbenzene ( <b>6a</b> ) detected by GC                                                                                                        | S30 |
| <b>Figure S51.</b> MS for ( <i>Z</i> )-1-methyl-4-styrylbenzene ( <b>6b</b> ) detected by GC                                                                                                        | S30 |
| <b>Figure S52.</b> GC of the crude mixture of 1-phenyl-1-propyne ( <b>7</b> ) transfer semihydrogenation with iPrOH catalyzed by <b>Mn-2</b>                                                        | S31 |
| <b>Figure S53.</b> MS for 1-phenyl-1-propyne ( <b>7</b> ) detected by GC                                                                                                                            | S31 |
| <b>Figure S54.</b> MS for ( <i>E</i> )-prop-1-en-1-ylbenzene ( <b>7a</b> ) detected by GC                                                                                                           | S32 |
| <b>Figure S55.</b> MS for ( <i>Z</i> )-prop-1-en-1-ylbenzene ( <b>7b</b> ) detected by GC                                                                                                           | S32 |
| <b>Figure S56.</b> MS for 3-phenyl-1-propyne detected by GC                                                                                                                                         | S33 |
| <b>Figure S57.</b> MS for allylbenzene detected by GC                                                                                                                                               | S33 |
| <b>Figure S58.</b> GC of the crude mixture of 2-(phenylethynyl)thiazole ( <b>8</b> ) transfer semihydrogenation with iPrOH catalyzed by <b>Mn-2</b>                                                 | S34 |
| <b>Figure S59.</b> MS for 2-(phenylethynyl)thiazole ( <b>8</b> ) detected by GC                                                                                                                     | S34 |

|                                                                                                                                                                                                            |     |
|------------------------------------------------------------------------------------------------------------------------------------------------------------------------------------------------------------|-----|
| <b>Figure S60.</b> GC of the crude mixture of 1,3-diphenylprop-2-yn-1-one ( <b>9</b> ) transfer semihydrogenation with iPrOH catalyzed by <b>Mn-2</b>                                                      | S35 |
| <b>Figure S61.</b> MS for 1,3-diphenylprop-2-yn-1-one ( <b>9</b> ) detected by GC                                                                                                                          | S35 |
| <b>Figure S62.</b> MS for ( <i>E</i> )-chalcone ( <b>9a</b> ) detected by GC                                                                                                                               | S36 |
| <b>Figure S63.</b> MS for ( <i>Z</i> )-chalcone ( <b>9b</b> ) detected by GC                                                                                                                               | S36 |
| <b>Figure S64.</b> MS for 5-hydroxy-1,3-diphenylhex-3-en-1-one detected by GC                                                                                                                              | S37 |
| <b>Figure S65.</b> GC of the crude mixture of 4-phenyl-3-butyn-2-one ( <b>10</b> ) transfer semihydrogenation with iPrOH catalyzed by <b>Mn-2</b>                                                          | S37 |
| <b>Figure S66.</b> GC of the crude mixture of 4-phenyl-3-butyn-2-one ( <b>10</b> ) transfer semihydrogenation with iPrOH catalyzed by <b>Mn-2</b> after 24 h at 100 °C                                     | S38 |
| <b>Figure S67.</b> GC of the crude mixture of 4-phenyl-3-butyn-2-one ( <b>10</b> ) (0.224 mmol), MeONa (10 mol%), THF (1 mL) and H <sub>2</sub> O (1 mL), at 100 °C for 4 h                                | S38 |
| <b>Figure S68.</b> GC of the crude mixture of ( <i>E</i> )-4-phenylbut-3-en-2-one ( <b>10a</b> ) (0.224 mmol), <b>Mn-2</b> (4 mol%), MeONa (10 mol%), THF (1 mL) and isopropanol (1 mL), at 100 °C for 4 h | S39 |
| <b>Figure S69.</b> GC of the crude mixture of ( <i>E</i> )-4-phenylbut-3-en-2-one ( <b>10a</b> ) (0.224 mmol), MeONa (10 mol%), THF (1 mL) and acetone (1 mL), at 100 °C for 4 h                           | S39 |
| <b>Figure S70.</b> MS for (5 <i>E</i> )-4-methyl-6-phenylhexa-3,5-dien-2-one detected by GC                                                                                                                | S40 |
| <b>Figure S71.</b> MS for 4-phenyl-3-butyn-2-one ( <b>10</b> ) detected by GC                                                                                                                              | S40 |
| <b>Figure S72.</b> MS for ( <i>E</i> )-4-phenylbut-3-en-2-one ( <b>10a</b> ) detected by GC                                                                                                                | S41 |
| <b>Figure S73.</b> MS for ( <i>Z</i> )-4-phenylbut-3-en-2-one ( <b>10b</b> ) detected by GC                                                                                                                | S41 |
| <b>Figure S74.</b> MS for 1-phenylbutane-1,3-dione detected by GC                                                                                                                                          | S42 |
| <b>Figure S75.</b> GC of the crude mixture of methyl phenylpropiolate ( <b>11</b> ) transfer semihydrogenation with iPrOH catalyzed by <b>Mn-2</b>                                                         | S42 |
| <b>Figure S76.</b> MS for methyl phenylpropiolate ( <b>11</b> ) detected by GC                                                                                                                             | S43 |
| <b>Figure S77.</b> MS for isopropyl phenylpropiolate detected by GC                                                                                                                                        | S43 |
| <b>Figure S78.</b> GC of the crude mixture of ethyl 2-pentynoate ( <b>12</b> ) transfer semihydrogenation with iPrOH catalyzed by <b>Mn-2</b>                                                              | S44 |
| <b>Figure S79.</b> MS for ethyl 2-pentynoate ( <b>12</b> ) detected by GC                                                                                                                                  | S44 |
| <b>Figure S80.</b> MS for isopropyl 2-pentynoate detected by GC                                                                                                                                            | S45 |
| <b>Figure S81.</b> GC of the crude mixture of 2-octynal ( <b>13</b> ) transfer semihydrogenation with iPrOH catalyzed by <b>Mn-2</b>                                                                       | S45 |
| <b>Figure S82.</b> MS for 1-heptyne detected by GC                                                                                                                                                         | S46 |
| <b>Figure S83.</b> MS for dimerization product of 1-heptyne detected by GC                                                                                                                                 | S46 |
| <b>Figure S84.</b> MS for coupling product between 1-heptyne and 2-octynal detected by GC                                                                                                                  | S47 |
| <b>Figure S85.</b> MS for dimerization product of 2-octynal detected by GC                                                                                                                                 | S47 |
| <b>Figure S86.</b> MS for dimerization product of 2-octynal detected by GC                                                                                                                                 | S48 |
| <b>Figure S87.</b> GC of the crude mixture of 3-pentyn-1-ol ( <b>14</b> ) transfer semihydrogenation with iPrOH catalyzed by <b>Mn-2</b>                                                                   | S48 |
| <b>Figure S88.</b> MS for 3-pentyn-1-ol ( <b>14</b> ) detected by GC                                                                                                                                       | S49 |
| <b>Figure S89.</b> MS for pent-3-en-1-ol ( <b>14a</b> ) detected by GC                                                                                                                                     | S49 |

|                                                                                                                                                                                                                                                                                                                                                                                                                                                                             |     |
|-----------------------------------------------------------------------------------------------------------------------------------------------------------------------------------------------------------------------------------------------------------------------------------------------------------------------------------------------------------------------------------------------------------------------------------------------------------------------------|-----|
| <b>Figure S90.</b> GC of the crude mixture of 1-acetoxy-4-diethylamino-2-butyne ( <b>15</b> ) transfer semihydrogenation with iPrOH catalyzed by <b>Mn-2</b>                                                                                                                                                                                                                                                                                                                | S50 |
| <b>Figure S91.</b> MS for 1-acetoxy-4-diethylamino-2-butyne ( <b>15</b> ) detected by GC                                                                                                                                                                                                                                                                                                                                                                                    | S50 |
| <b>Figure S92.</b> GC of the crude mixture of 3-hexyne ( <b>16</b> ) transfer semihydrogenation with iPrOH catalyzed by <b>Mn-2</b>                                                                                                                                                                                                                                                                                                                                         | S51 |
| <b>Figure S93.</b> MS for 3-hexyne ( <b>16</b> ) detected by GC                                                                                                                                                                                                                                                                                                                                                                                                             | S51 |
| <b>Figure S94.</b> GC of the crude mixture of 1,4-dichloro-2-butyne ( <b>17</b> ) transfer semihydrogenation with iPrOH catalyzed by <b>Mn-2</b>                                                                                                                                                                                                                                                                                                                            | S52 |
| <b>Figure S95.</b> MS for 1,4-dichloro-2-butyne ( <b>17</b> ) detected by GC                                                                                                                                                                                                                                                                                                                                                                                                | S52 |
| <b>Figure S96.</b> GC of the crude mixture of phenylacetylene ( <b>18</b> ) transfer semihydrogenation with iPrOH catalyzed by <b>Mn-2</b>                                                                                                                                                                                                                                                                                                                                  | S53 |
| <b>Figure S97.</b> MS for phenylacetylene ( <b>18</b> ) detected by GC                                                                                                                                                                                                                                                                                                                                                                                                      | S53 |
| <b>Figure S98.</b> MS for dimerization product of phenylacetylene detected by GC                                                                                                                                                                                                                                                                                                                                                                                            | S54 |
| <b>Figure S99.</b> GC of the crude mixture of cyclopentylacetylene ( <b>19</b> ) transfer semihydrogenation with iPrOH catalyzed by <b>Mn-2</b>                                                                                                                                                                                                                                                                                                                             | S54 |
| <b>Figure S100.</b> MS for cyclopentylacetylene ( <b>19</b> ) detected by GC                                                                                                                                                                                                                                                                                                                                                                                                | S55 |
| <b>Figure S101.</b> MS for vinylcyclopentane ( <b>19a</b> ) detected by GC                                                                                                                                                                                                                                                                                                                                                                                                  | S55 |
| <b>Figure S102.</b> MS for dimerization product of cyclopentylacetylene detected by GC                                                                                                                                                                                                                                                                                                                                                                                      | S56 |
| <b>Figure S103.</b> Kinetic profile of the semihydrogenation of <b>1</b> with iPrOH as transfer agent and <b>Mn-2</b> as pre-catalyst. Yields determined by GC-MS                                                                                                                                                                                                                                                                                                           | S57 |
| <b>Figure S104.</b> GC of the crude mixture of the test with <i>cis</i> -stilbene ( <b>1b</b> ) for the isomerization catalyzed by <b>Mn-2</b> in the presence of iPrOH                                                                                                                                                                                                                                                                                                     | S58 |
| <b>Figure S105.</b> GC of the crude mixture of the test with <i>trans</i> -stilbene ( <b>1a</b> ) for the isomerization catalyzed by <b>Mn-2</b> in the presence of iPrOH                                                                                                                                                                                                                                                                                                   | S58 |
| <b>Figure S106.</b> GC of the crude mixture of the test with <i>cis</i> -stilbene ( <b>1a</b> ) for the isomerization catalyzed by <b>Mn-2</b> in the absence of iPrOH                                                                                                                                                                                                                                                                                                      | S59 |
| <b>Figure S107.</b> GC of the crude mixture of the test with <i>cis</i> -stilbene ( <b>1a</b> ) for the isomerization in the presence of iPrOH but in the absence of any Mn-based catalytic precursor                                                                                                                                                                                                                                                                       | S59 |
| <b>Figure S108.</b> GC of the crude mixture of the diphenylacetylene ( <b>1</b> ) transfer semihydrogenation with iPrOH catalyzed by <b>Mn-2</b> in the presence of 1.1 eq of triphenylphosphine                                                                                                                                                                                                                                                                            | S60 |
| <b>Figure S109.</b> MS for triphenylphosphine detected by GC                                                                                                                                                                                                                                                                                                                                                                                                                | S60 |
| <b>Figure S110.</b> $^{31}\text{P}\{^1\text{H}\}$ NMR (243 MHz, THF- $d_8$ ) monitoring of transfer semihydrogenation of <b>1</b> with iPrOH catalyzed by <b>Mn-2</b> . (a) <b>Mn-2</b> and iPrOH; (b) <b>Mn-2</b> , iPrOH and MeONa; (c) <b>b</b> after heating at 70 °C for 30 min; (d) <b>c</b> after addition of <b>1</b> ; (e) <b>d</b> after heating at 70 °C for 30 min. The final molar ratio of <b>Mn-2</b> , iPrOH, MeONa and <b>1</b> was 1:4:2:1                | S62 |
| <b>Figure S111.</b> Enlargement of $^{31}\text{P}\{^1\text{H}\}$ NMR (243 MHz, THF- $d_8$ ) monitoring of transfer semihydrogenation of <b>1</b> with iPrOH catalyzed by <b>Mn-2</b> . (a) <b>Mn-2</b> and iPrOH; (b) <b>Mn-2</b> , iPrOH and MeONa; (c) <b>b</b> after heating at 70 °C for 30 min; (d) <b>c</b> after addition of <b>1</b> ; (e) <b>d</b> after heating at 70 °C for 30 min. The final molar ratio of <b>Mn-2</b> , iPrOH, MeONa and <b>1</b> was 1:4:2:1 | S63 |

**Figure S112.** Enlargement of  $^{31}\text{P}\{^1\text{H}\}$  NMR (243 MHz, THF- $d_8$ ) spectrum of reaction mixture **e**. The molar ratio of **Mn-2**, iPrOH, MeONa and **1** was 1:4:2:1 \_\_\_\_\_ S64

**Figure S113.**  $^1\text{H}$  NMR (600 MHz, THF- $d_8$ ) monitoring of transfer semihydrogenation of **1** with iPrOH catalyzed by **Mn-2**. (a) **Mn-2** and iPrOH; (b) **Mn-2**, iPrOH and MeONa; (c) **b** after heating at 70 °C for 30 min; (d) **c** after addition of **1**; (e) **d** after heating at 70 °C for 30 min. The final molar ratio of **Mn-2**, iPrOH, MeONa and **1** was 1:4:2:1 \_\_\_\_\_ S65

**Figure S114.** Enlargement of non-hydride region of the  $^1\text{H}$  NMR (600 MHz, THF- $d_8$ ) monitoring of transfer semihydrogenation of **1** with iPrOH catalyzed by **Mn-2**. (a) **Mn-2** and iPrOH; (b) **Mn-2**, iPrOH and MeONa; (c) **b** after heating at 70 °C for 30 min; (d) **c** after addition of **1**; (e) **d** after heating at 70 °C for 30 min. The final molar ratio of **Mn-2**, iPrOH, MeONa and **1** was 1:4:2:1 \_\_\_\_\_ S66

**Figure S115.** Enlargement of hydride region of the  $^1\text{H}$  NMR (600 MHz, THF- $d_8$ ) monitoring of transfer semihydrogenation of **1** with iPrOH catalyzed by **Mn-2**. (a) **Mn-2** and iPrOH; (b) **Mn-2**, iPrOH and MeONa; (c) **b** after heating at 70 °C for 30 min; (d) **c** after addition of **1**; (e) **d** after heating at 70 °C for 30 min. The final molar ratio of **Mn-2**, iPrOH, MeONa and **1** was 1:4:2:1 \_\_\_\_\_ S67

**Figure S116.** Enlargement of hydride region of the  $^1\text{H}$  NMR (600 MHz, THF- $d_8$ ) spectrum of reaction mixture **e**. The molar ratio of **Mn-2**, iPrOH, MeONa and **1** was 1:4:2:1 \_\_\_\_\_ S68

**Figure 117.** Enlargement of non-hydride region of the  $^1\text{H}$  NMR (600 MHz, THF- $d_8$ ) spectrum of reaction mixture **e**. The molar ratio of **Mn-2**, iPrOH, MeONa and **1** was 1:4:2:1 \_\_\_\_\_ S69

## Index of Tables

**Table S1.** Full optimization of transfer semihydrogenation of diphenylacetylene (**1**) with Mn-based precursors \_\_\_\_\_ S11

## Index of Schemes

**Scheme S1.** Mechanistic proposal for the Mn-catalyzed reversible isomerization of *Z*- and *E*-alkenes with **Mn-2** as catalytic precursor and iPrOH as hydrogen source \_\_\_\_\_ S61

## I. Characterization of prepared Mn(I) complexes

Characterization of *fac*-[Mn(OTf)(dippe)(CO)<sub>3</sub>] (**Mn-1**)

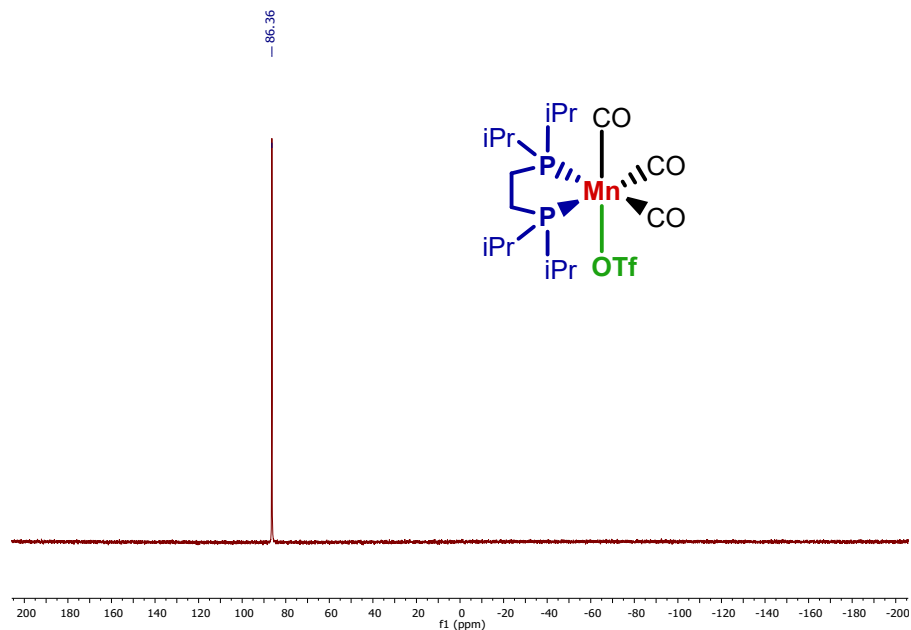

**Figure S1.**  $^{31}\text{P}\{^1\text{H}\}$  NMR (243 MHz, THF- $d_8$ ) spectrum for **Mn-1**

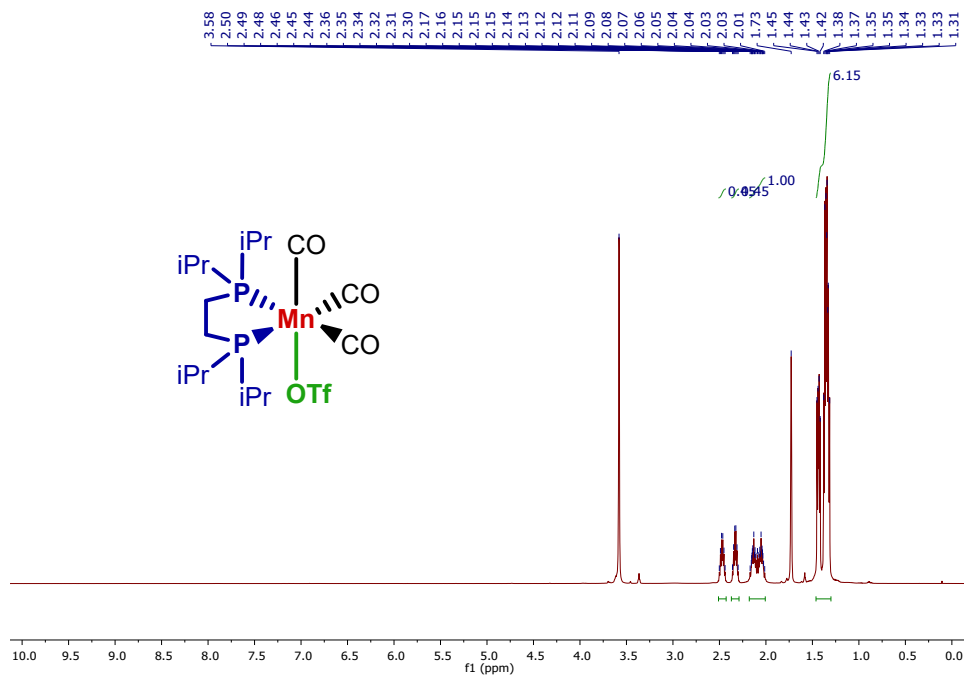

**Figure S2.**  $^1\text{H}$  NMR (600 MHz, THF- $d_8$ ) spectrum for **Mn-1**

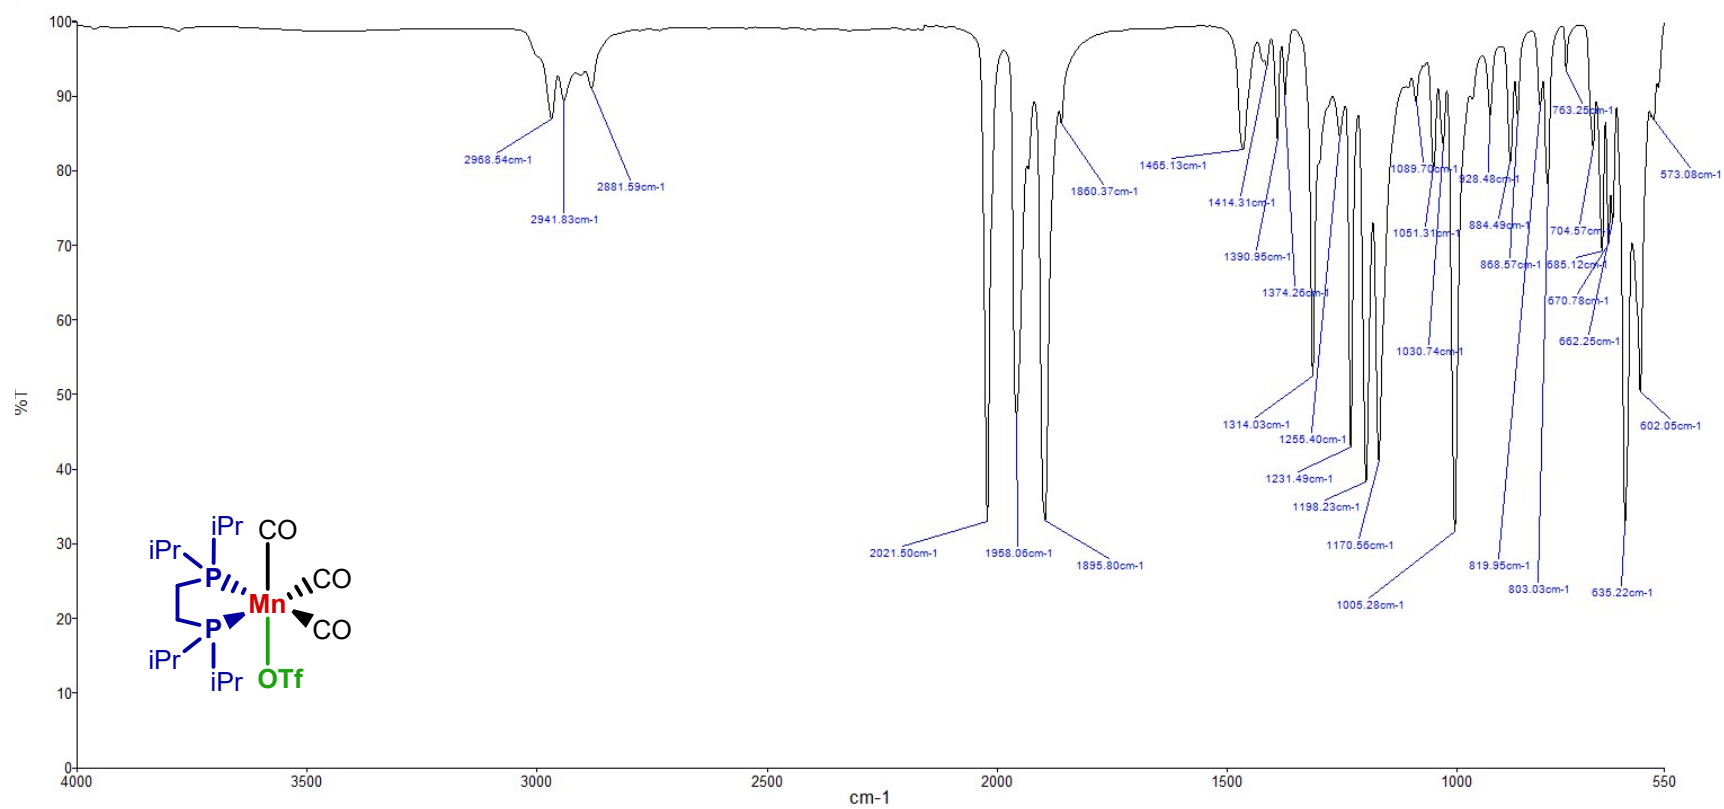

**Figure S3.** FTIR (ATR) spectrum for **Mn-1**

Characterization of *fac*-[Mn(Br)(dippe)(CO)<sub>3</sub>] (**Mn-2**)

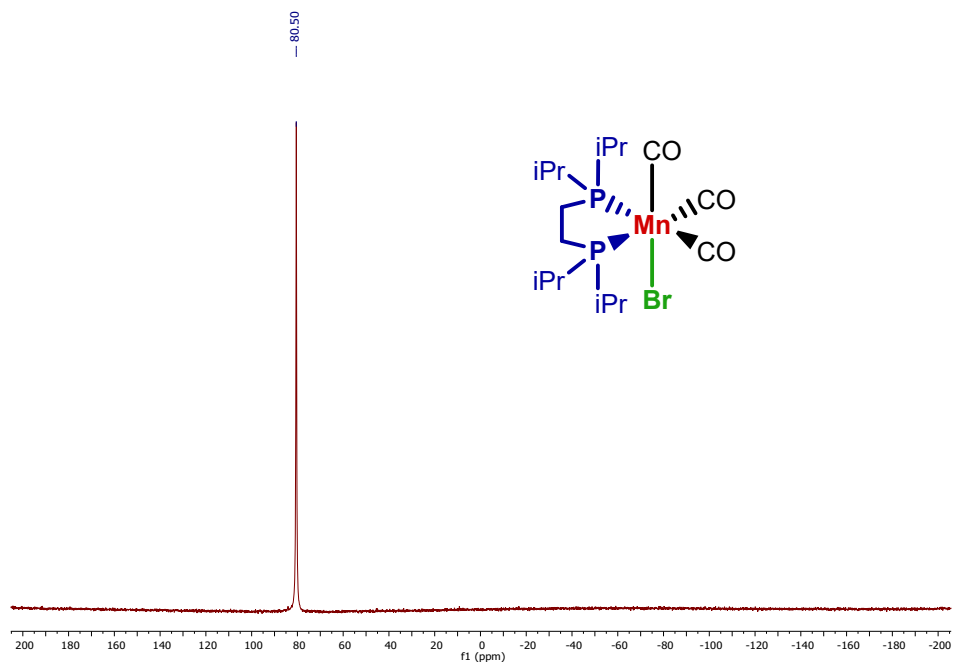

**Figure S4.** <sup>31</sup>P{<sup>1</sup>H} NMR (243 MHz, THF-*d*<sub>8</sub>) spectrum for **Mn-2**

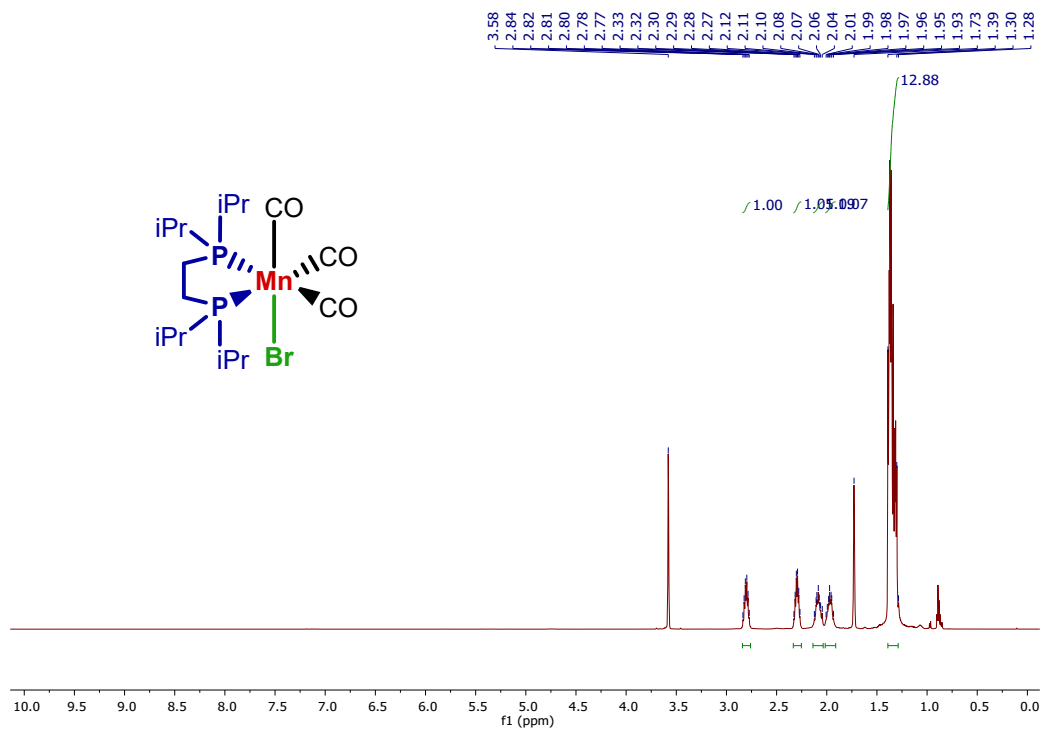

**Figure S5.** <sup>1</sup>H NMR (600 MHz, THF-*d*<sub>8</sub>) spectrum for **Mn-2**

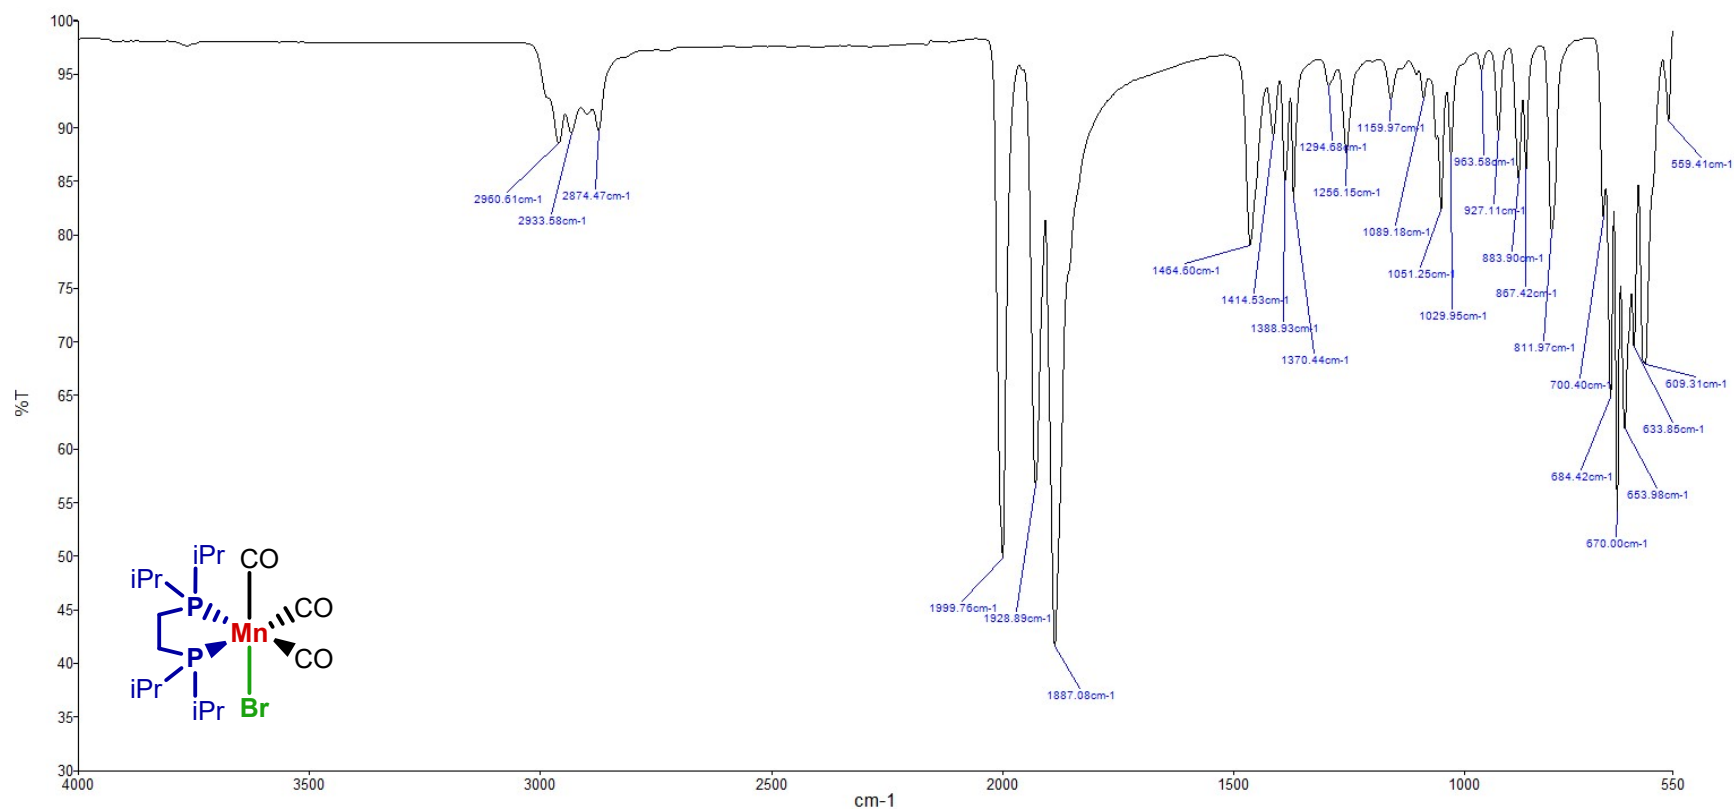

**Figure S6.** FTIR (ATR) spectrum for **Mn-2**

Characterization of *fac*-[Mn(Br)(dcype)(CO)<sub>3</sub>] (**Mn-3**)

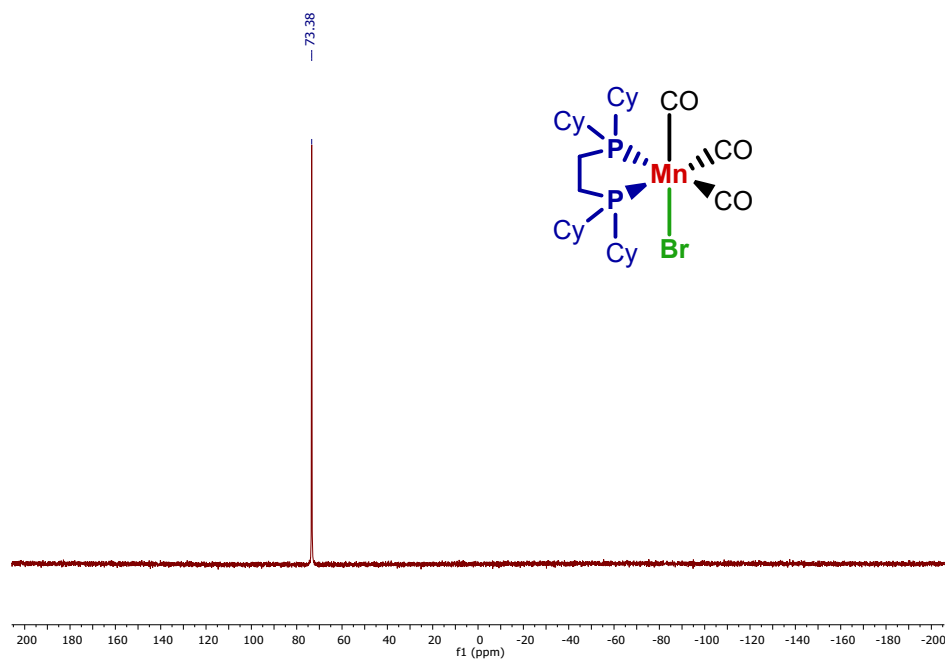

**Figure S7.** <sup>31</sup>P{<sup>1</sup>H} NMR (243 MHz, THF-*d*<sub>8</sub>) spectrum for **Mn-3**

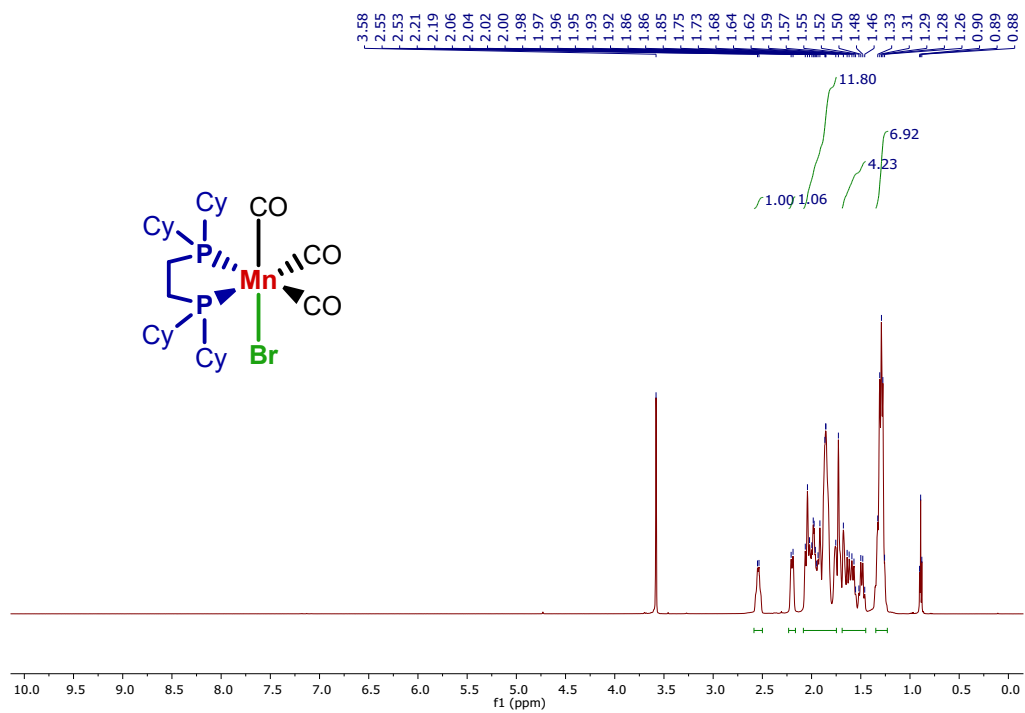

**Figure S8.** <sup>1</sup>H NMR (600 MHz, THF-*d*<sub>8</sub>) spectrum for **Mn-3**

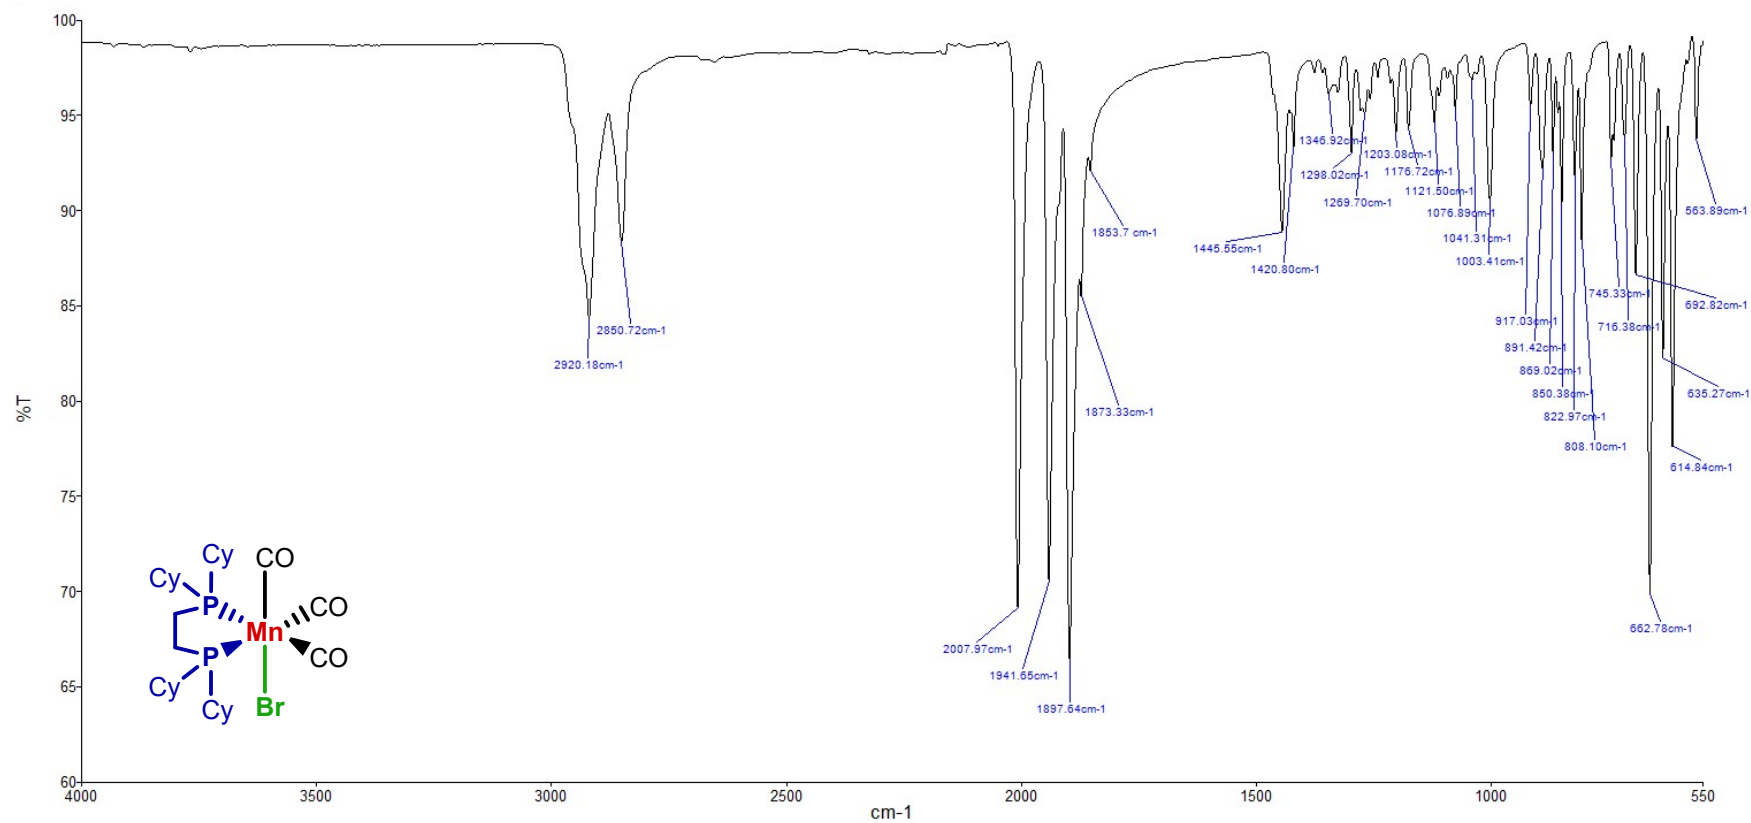

**Figure S9.** FTIR (ATR) spectrum for **Mn-3**

Characterization of *fac*-[Mn(Br)(dppe)(CO)<sub>3</sub>] (**Mn-4**)

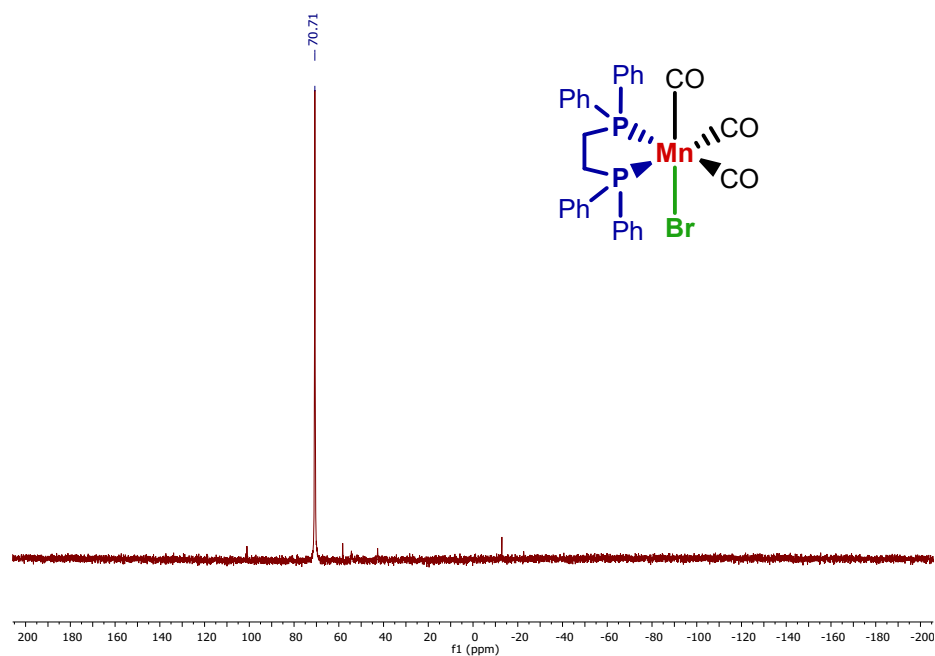

**Figure S10.**  $^{31}\text{P}\{^1\text{H}\}$  NMR (243 MHz,  $\text{THF-}d_8$ ) spectrum for **Mn-4**

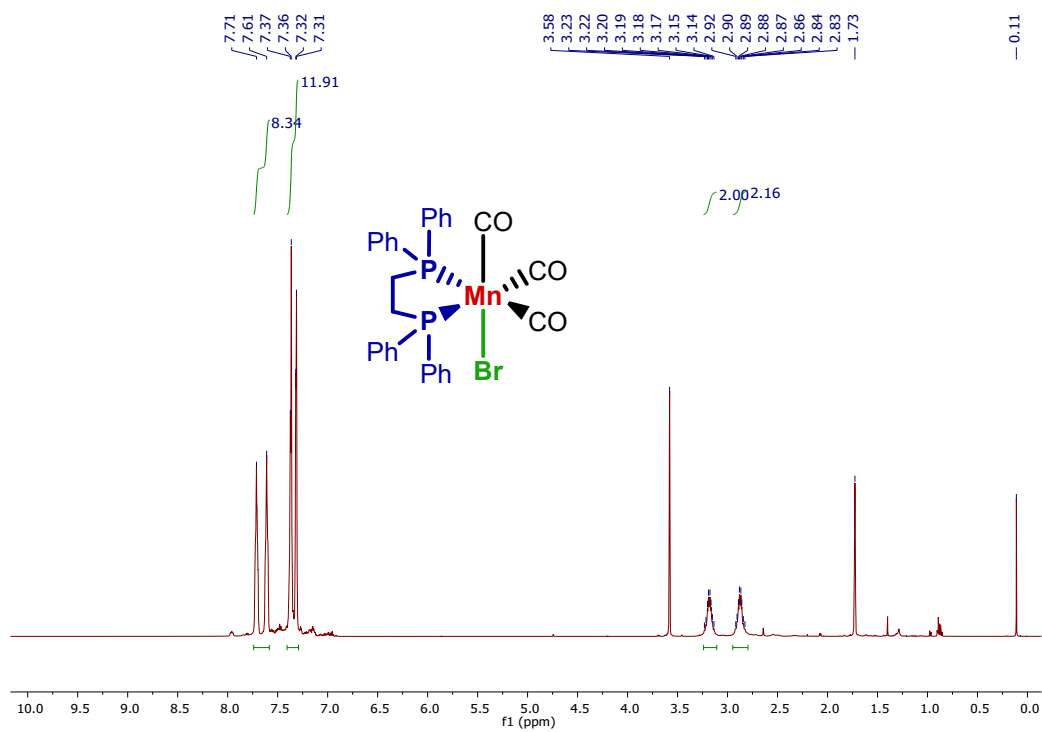

**Figure S11.**  $^1\text{H}$  NMR (600 MHz,  $\text{THF-}d_8$ ) spectrum for **Mn-4**

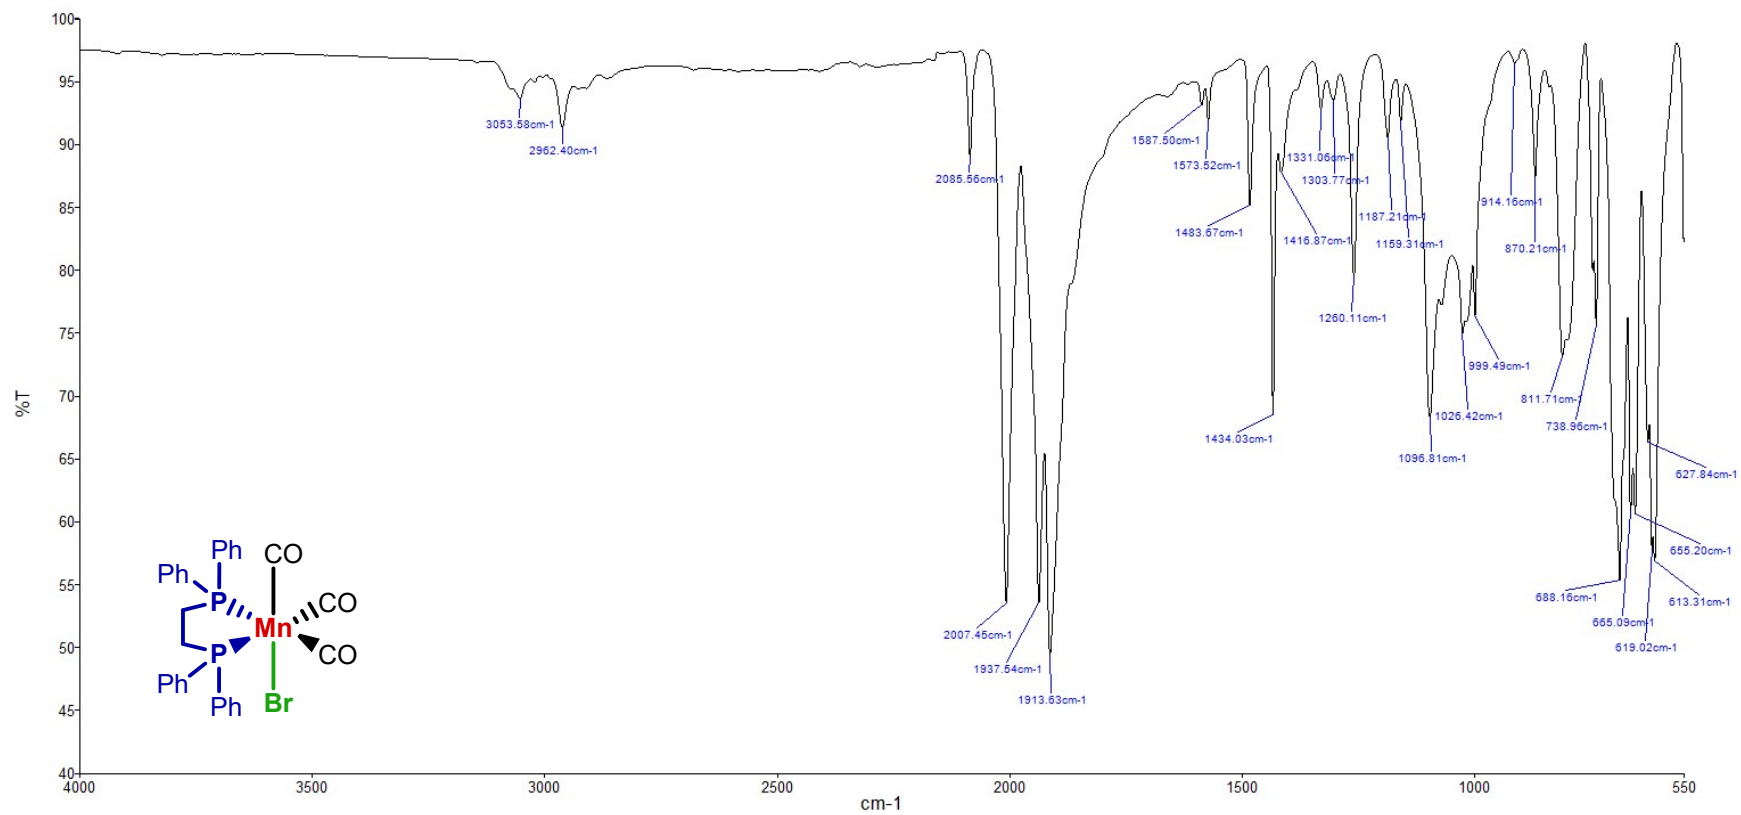

**Figure S12.** FTIR (ATR) spectrum for **Mn-4**

Characterization of *fac*-[Mn(H)(dippe)(CO)<sub>3</sub>] (**Mn-5**)

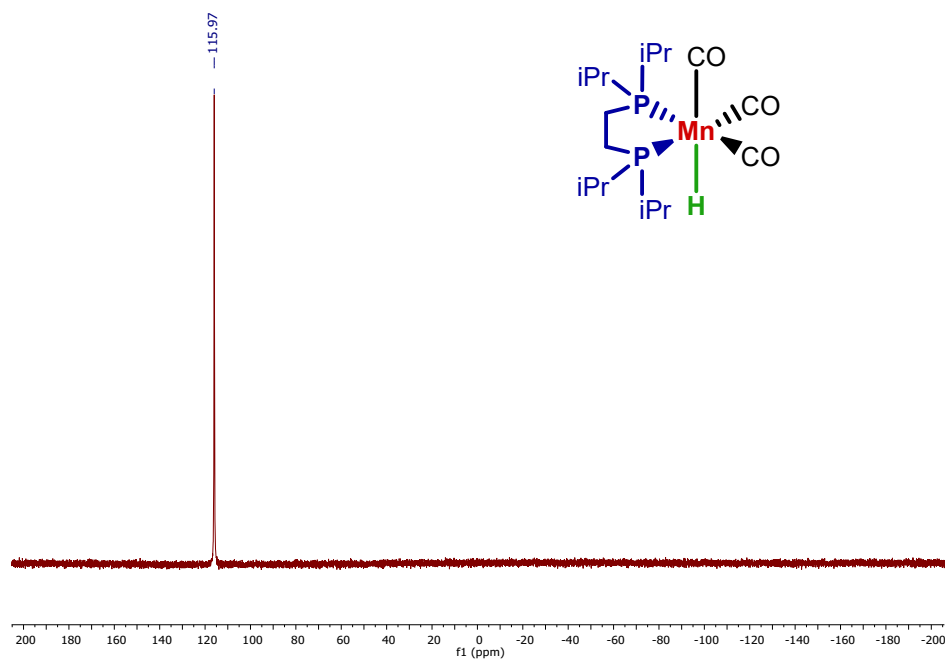

**Figure S13.** <sup>31</sup>P{<sup>1</sup>H} NMR (243 MHz, THF-*d*<sub>8</sub>) spectrum for **Mn-5**

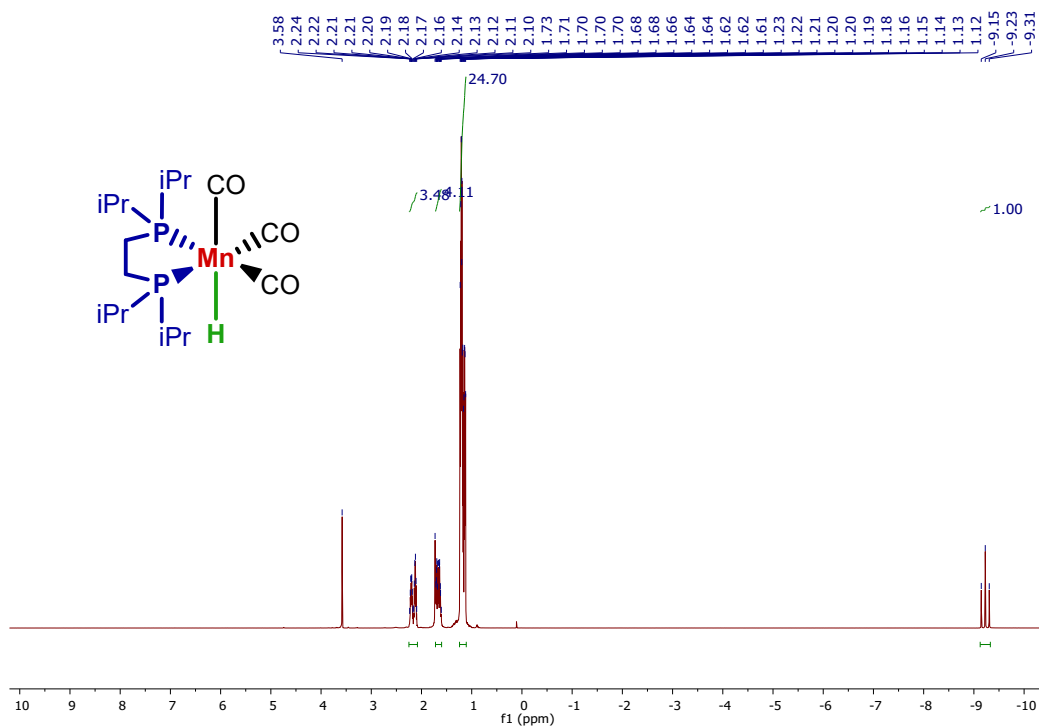

**Figure S14.** <sup>1</sup>H NMR (600 MHz, THF-*d*<sub>8</sub>) spectrum for **Mn-5**

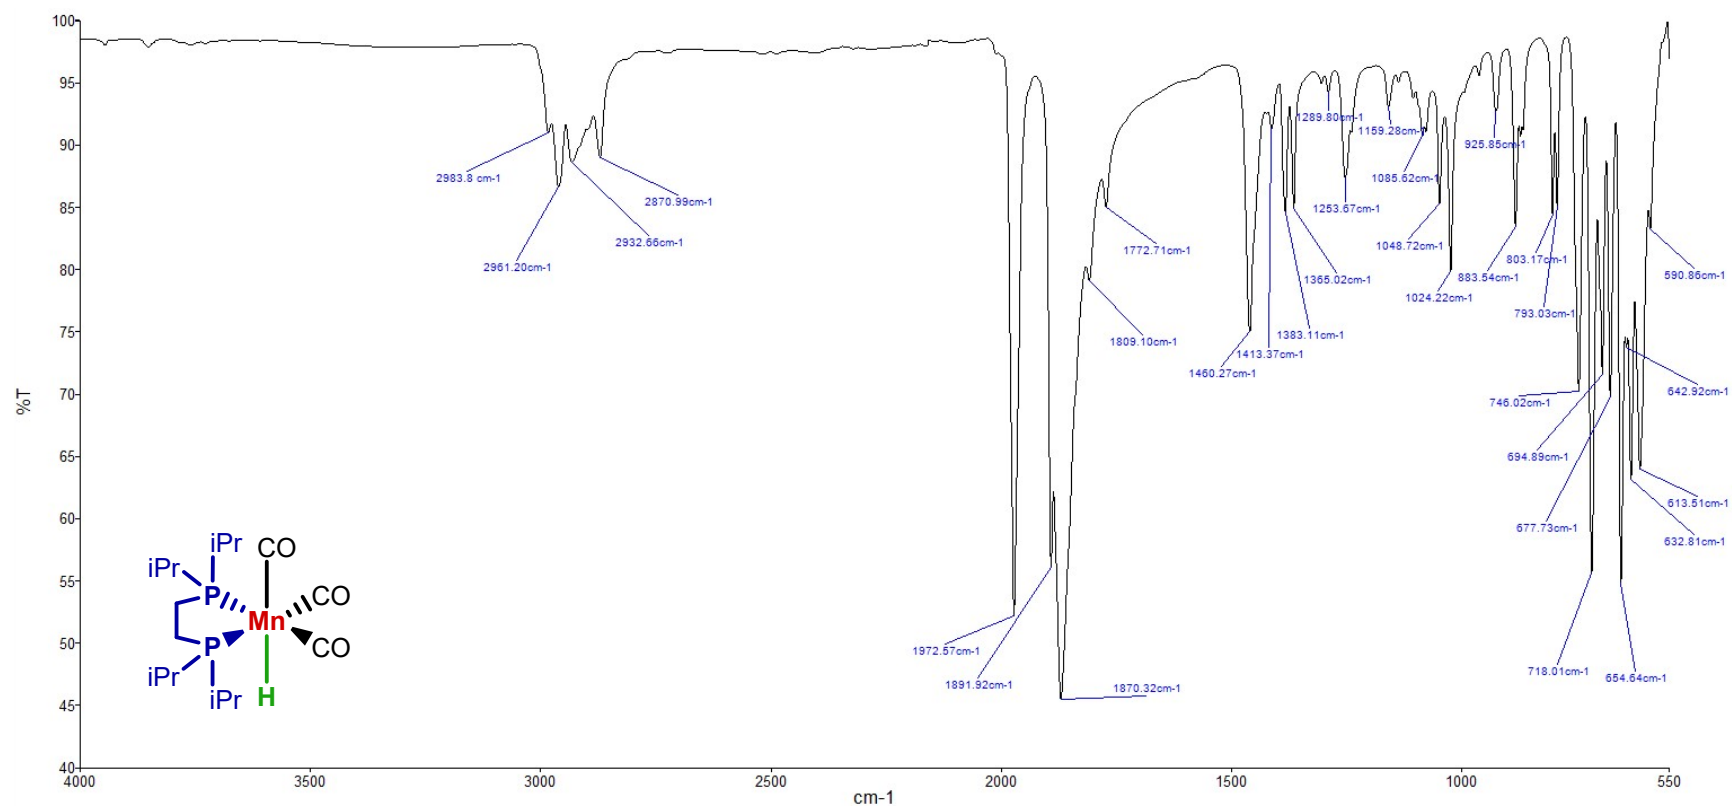

**Figure S15.** FTIR (ATR) spectrum for **Mn-5**

## II. Optimization of *E*-selective transfer semihydrogenation of diphenylacetylene (**1**) using Mn(I)-based precursors

**Table S1.** Full optimization of transfer semihydrogenation of diphenylacetylene (**1**) with Mn-based precursors<sup>a</sup>

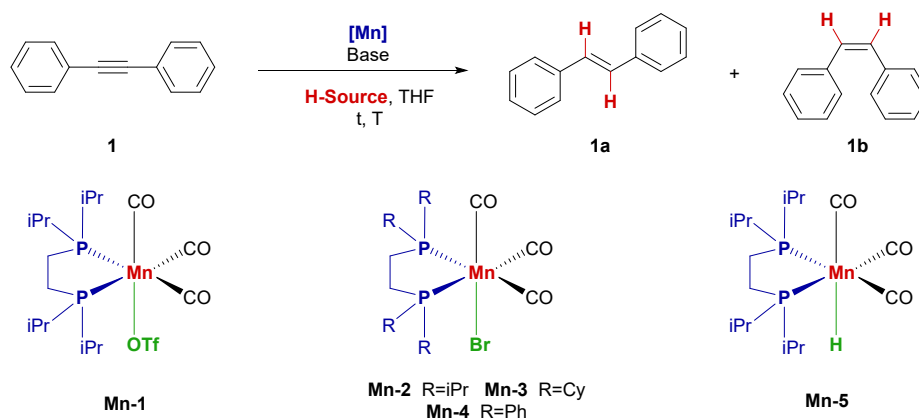

| Entry          | [Mn]<br>(mol%) | Base<br>(mol%)                       | H-Source<br>(mL) | T<br>(°C) | t<br>(h) | Conversion (%) <sup>b</sup> |
|----------------|----------------|--------------------------------------|------------------|-----------|----------|-----------------------------|
| 1              | Mn-1 (3)       | <sup>t</sup> BuOK (10)               | iPrOH (3)        | 100       | 18       | 88, 90:10 <i>E/Z</i>        |
| 2              | Mn-1 (3)       | <sup>t</sup> BuOK (10)               | iPrOH (3)        | 120       | 22       | 88, 91:9 <i>E/Z</i>         |
| 3              | Mn-1 (6)       | <sup>t</sup> BuOK (20)               | iPrOH (3)        | 100       | 18       | 98, 99:1 <i>E/Z</i>         |
| 4              | Mn-1 (5)       | <sup>t</sup> BuOK (20)               | iPrOH (3)        | 100       | 18       | 98, 98:2 <i>E/Z</i>         |
| 5              | Mn-1 (5)       | <sup>t</sup> BuOK (15)               | iPrOH (3)        | 100       | 18       | 96, 96:4 <i>E/Z</i>         |
| 6              | Mn-1 (4)       | <sup>t</sup> BuOK (20)               | iPrOH (3)        | 100       | 18       | 93, 96:4 <i>E/Z</i>         |
| 7 <sup>c</sup> | Mn-1 (5)       | <sup>t</sup> BuOK (20)               | iPrOH (3)        | 100       | 18       | n.d.                        |
| 8              | Mn-1 (5)       | <sup>t</sup> BuOK (20)               | iPrOH (1)        | 100       | 18       | 97, 97:3 <i>E/Z</i>         |
| 9              | Mn-1 (5)       | NEt <sub>3</sub> (20)                | iPrOH (1)        | 100       | 18       | 4, 12:88 <i>E/Z</i>         |
| 10             | Mn-1 (5)       | K <sub>2</sub> CO <sub>3</sub> (20)  | iPrOH (1)        | 100       | 18       | 62, 64:36 <i>E/Z</i>        |
| 11             | Mn-1 (5)       | K <sub>2</sub> CO <sub>3</sub> (40)  | iPrOH (1)        | 100       | 18       | 77, 77:23 <i>E/Z</i>        |
| 12             | Mn-1 (5)       | Na <sub>2</sub> CO <sub>3</sub> (20) | iPrOH (1)        | 100       | 18       | 68, 84:16 <i>E/Z</i>        |
| 13             | Mn-1 (5)       | Cs <sub>2</sub> CO <sub>3</sub> (20) | iPrOH (1)        | 100       | 18       | 46, 45:55 <i>E/Z</i>        |
| 14             | Mn-1 (5)       | KOH (20)                             | iPrOH (1)        | 100       | 18       | 97, 97:3 <i>E/Z</i>         |

|                 |                             |            |                        |     |    |                      |
|-----------------|-----------------------------|------------|------------------------|-----|----|----------------------|
| 15              | Mn-1 (5)                    | NaOH (20)  | iPrOH (1)              | 100 | 18 | 97, 98:2 <i>E/Z</i>  |
| 16              | Mn-1 (5)                    | MeONa (20) | iPrOH (1)              | 100 | 18 | 98, 98:2 <i>E/Z</i>  |
| 17              | Mn-1 (5)                    | MeONa (10) | iPrOH (1)              | 100 | 18 | 98, 98:2 <i>E/Z</i>  |
| 18              | Mn-1 (5)                    | MeONa (5)  | iPrOH (1)              | 100 | 18 | 95, 96:4 <i>E/Z</i>  |
| 19              | Mn-1 (5)                    | /          | iPrOH (1)              | 100 | 18 | 7, 36:64 <i>E/Z</i>  |
| 20              | Mn-1 (4)                    | MeONa (10) | iPrOH (1)              | 100 | 18 | 96, 97:3 <i>E/Z</i>  |
| 21              | Mn-1 (3)                    | MeONa (10) | iPrOH (1)              | 100 | 18 | 93, 96:4 <i>E/Z</i>  |
| 22              | Mn-1 (4)                    | MeONa (10) | iPrOH (1)              | 100 | 4  | 95, 97:3 <i>E/Z</i>  |
| 23              | Mn-1 (4)                    | MeONa (10) | iPrOH (1)              | 100 | 3  | 95, 94:6 <i>E/Z</i>  |
| 24              | Mn-1 (4)                    | MeONa (10) | iPrOH (1)              | 90  | 4  | 87, 89:11 <i>E/Z</i> |
| 25              | Mn-2 (4)                    | MeONa (10) | iPrOH (1)              | 100 | 4  | 98, 97:3 <i>E/Z</i>  |
| 26              | Mn-3 (4)                    | MeONa (10) | iPrOH (1)              | 100 | 4  | 87, 82:18 <i>E/Z</i> |
| 27              | Mn-4 (4)                    | MeONa (10) | iPrOH (1)              | 100 | 4  | 31, 38:62 <i>E/Z</i> |
| 28              | Mn-5 (4)                    | MeONa (10) | iPrOH (1)              | 100 | 4  | 13, 2:98 <i>E/Z</i>  |
| 29              | Mn(Br)(CO) <sub>5</sub> (4) | MeONa (10) | iPrOH (1)              | 100 | 4  | n.d.                 |
| 30              | /                           | MeONa (10) | iPrOH (1)              | 100 | 4  | n.d.                 |
| 31              | Mn-2 (4)                    | KOH (10)   | iPrOH (1)              | 100 | 4  | 93, 93:7 <i>E/Z</i>  |
| 32              | Mn-2 (4)                    | NaOH (10)  | iPrOH (1)              | 100 | 4  | 92, 93:7 <i>E/Z</i>  |
| 33              | Mn-2 (4)                    | MeONa (10) | MeOH (1)               | 100 | 4  | 2, 48:52 <i>E/Z</i>  |
| 34              | Mn-2 (4)                    | MeONa (10) | EtOH (1)               | 100 | 4  | 12, 10:90 <i>E/Z</i> |
| 35              | Mn-2 (4)                    | MeONa (10) | HCO <sub>2</sub> H (1) | 100 | 4  | 8, 31:69 <i>E/Z</i>  |
| 36              | Mn-2 (4)                    | MeONa (10) | <i>n</i> -BuOH (1)     | 100 | 4  | 8, 23:77 <i>E/Z</i>  |
| 37              | Mn-2 (4)                    | MeONa (10) | 2-BuOH (1)             | 100 | 4  | 88, 89:11 <i>E/Z</i> |
| 38              | Mn-2 (4)                    | MeONa (10) | Ethylene glycol (1)    | 100 | 4  | n.d.                 |
| 39              | Mn-2 (4)                    | MeONa (10) | Glycerol (1)           | 100 | 4  | 2, 39:61 <i>E/Z</i>  |
| 40 <sup>d</sup> | Mn-2 (4)                    | MeONa (10) | iPrOH (1)              | 100 | 4  | 91, 93:7 <i>E/Z</i>  |
| 41 <sup>e</sup> | Mn-2 (4)                    | MeONa (10) | iPrOH (1)              | 100 | 4  | 90, 91:9 <i>E/Z</i>  |

<sup>a</sup> Reaction conditions: diphenylacetylene (0.224 mmol), THF (1 mL). <sup>b</sup> Conversions and stereoselectivities were determined by GC-MS. <sup>c</sup> No THF <sup>d</sup> Hg drop test. <sup>e</sup> TEMPO (1.1 eq) was added.

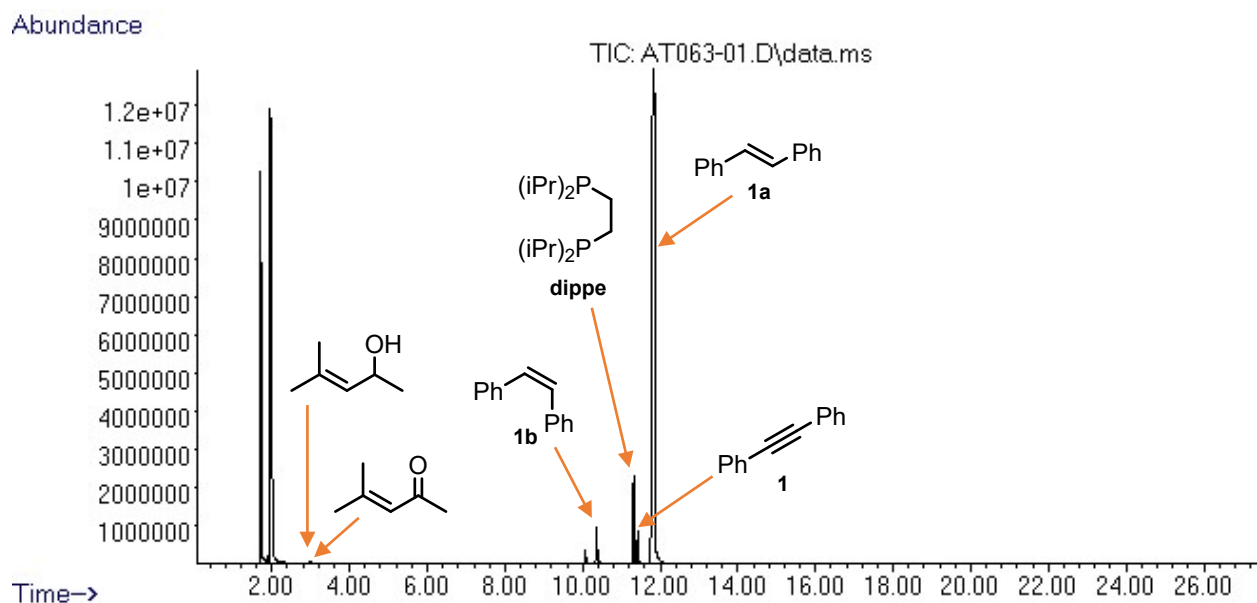

**Figure S16.** Typical GC of the crude mixture for **1** transfer semihydrogenation with iPrOH catalyzed by **Mn-2**

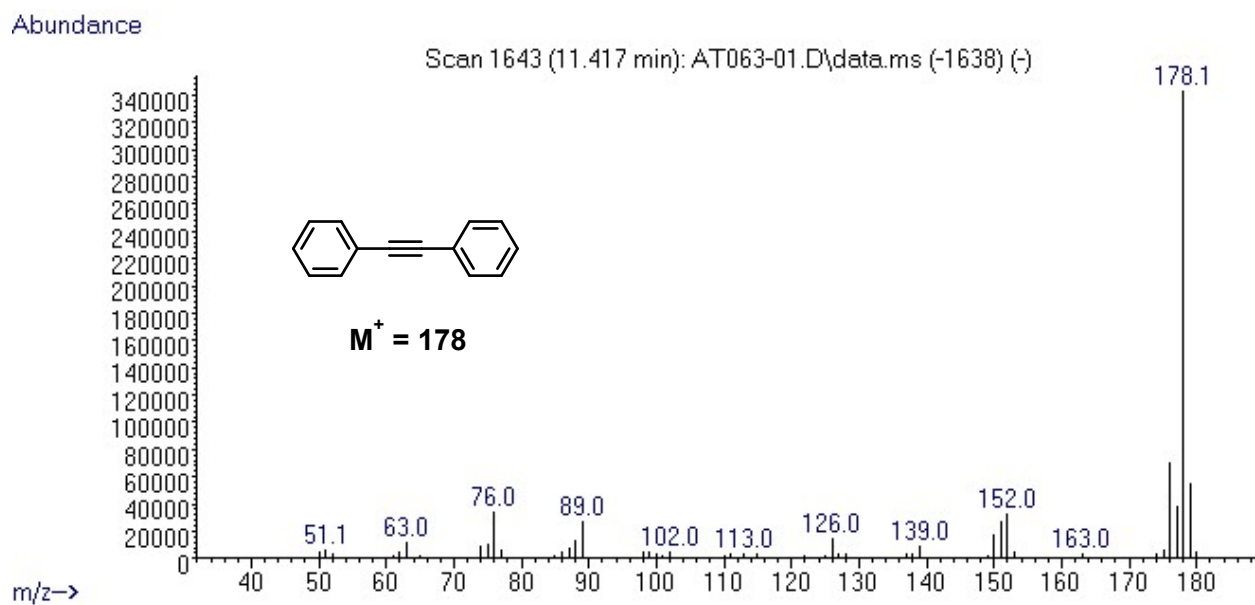

**Figure S17.** MS for diphenylacetylene (**1**) detected by GC

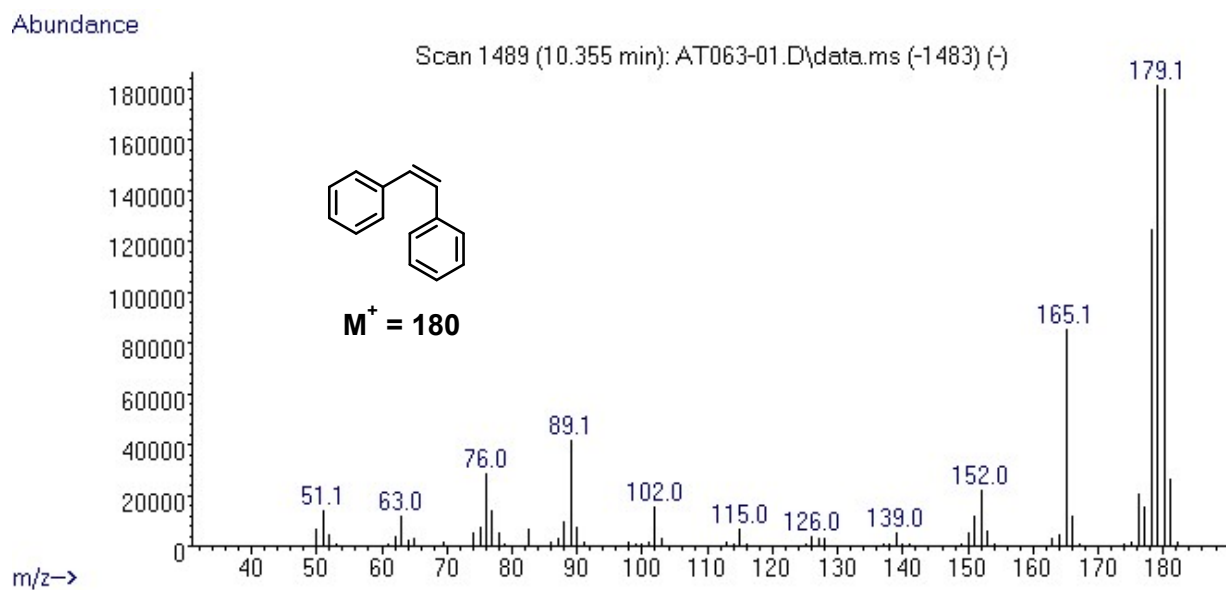

**Figure S18.** MS for *cis*-stilbene (**1b**) detected by GC

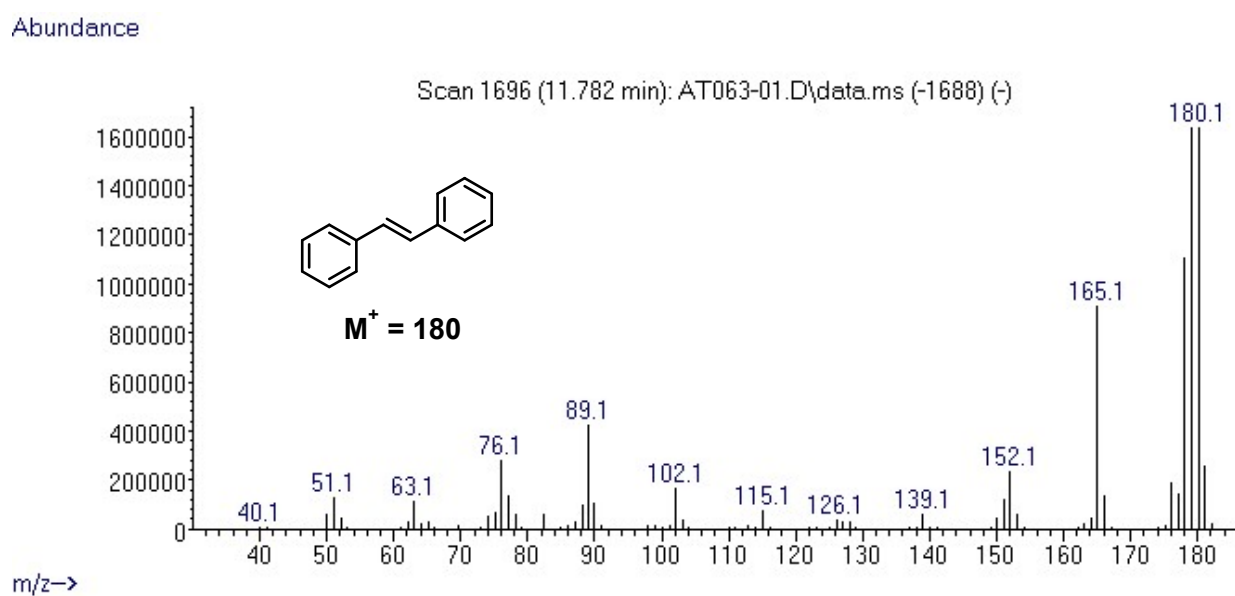

**Figure S19.** MS for *trans*-stilbene (**1a**) detected by GC

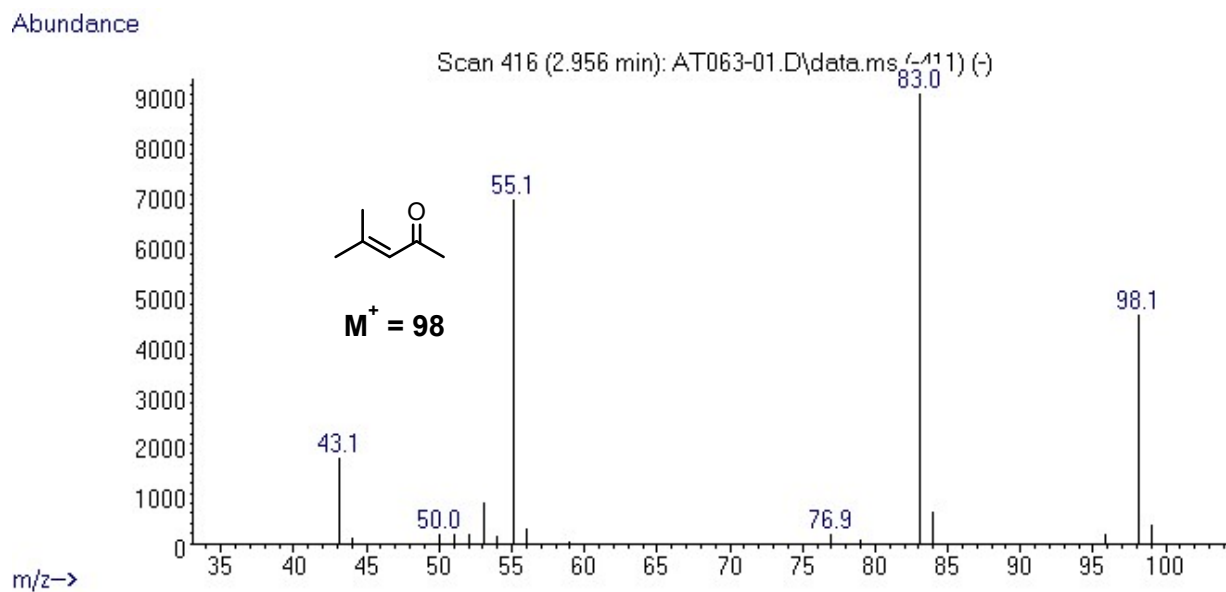

**Figure S20.** MS for 4-methylpent-3-en-2-one detected by GC

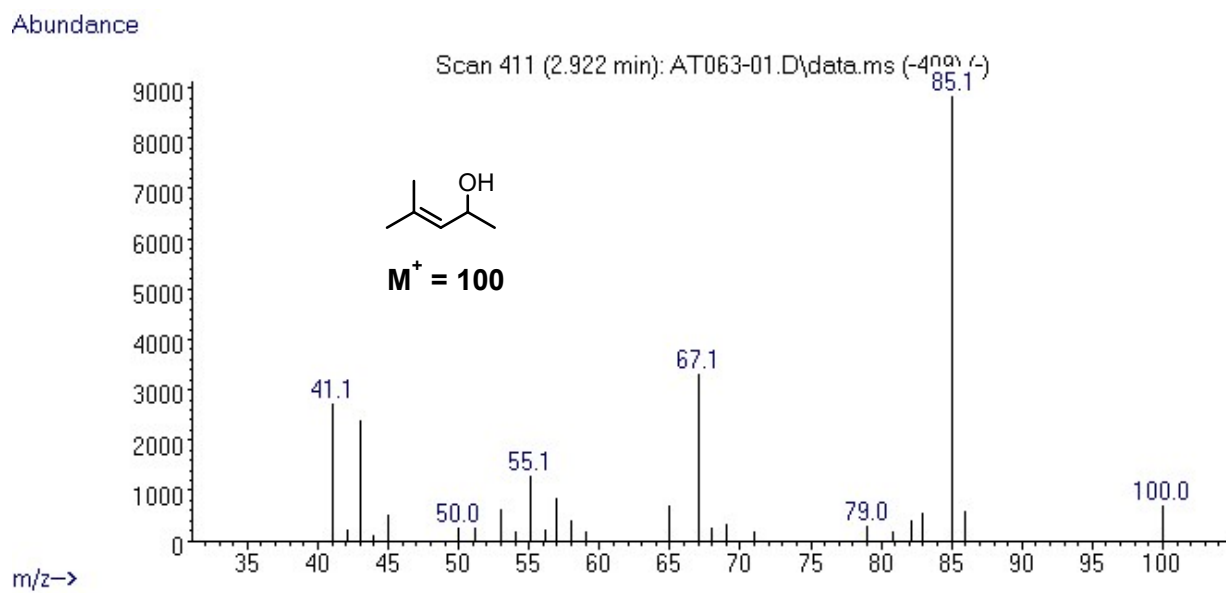

**Figure S21.** MS for 4-methylpent-3-en-2-ol detected by GC

### III. Scope

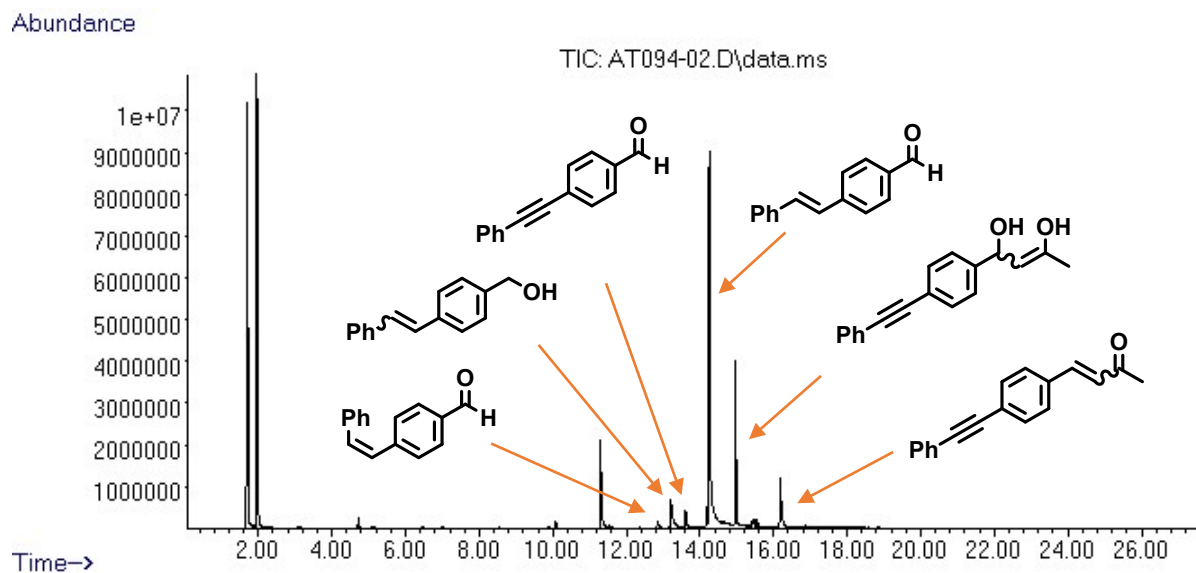

**Figure S22.** GC of the crude mixture of 4-(phenylethynyl)benzaldehyde (**2**) transfer semihydrogenation with iPrOH catalyzed by **Mn-2**

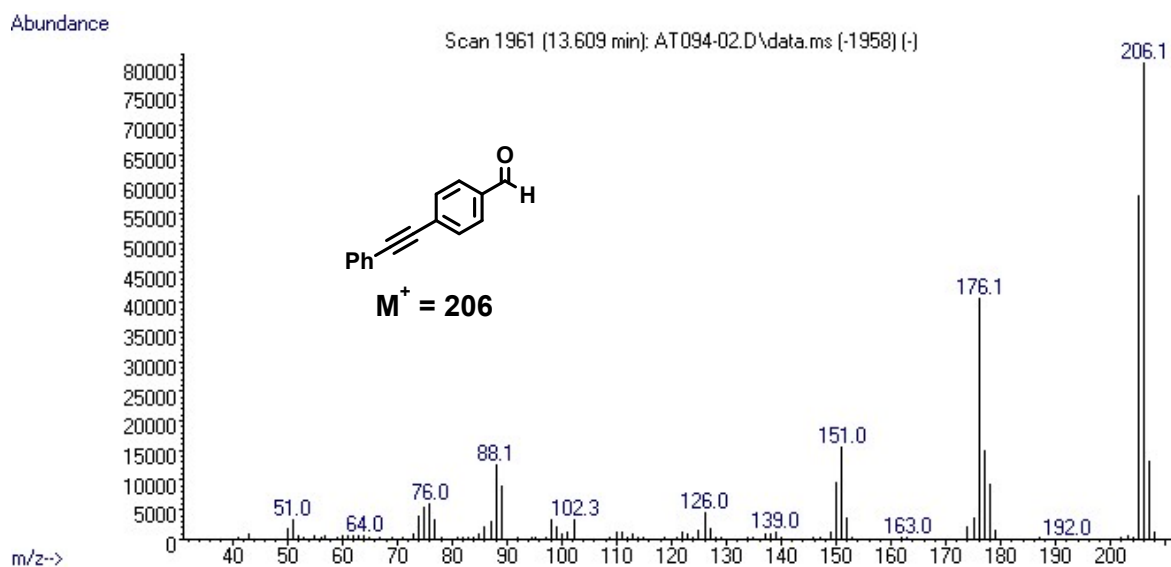

**Figure S23.** MS for 4-(phenylethynyl)benzaldehyde (**2**) detected by GC

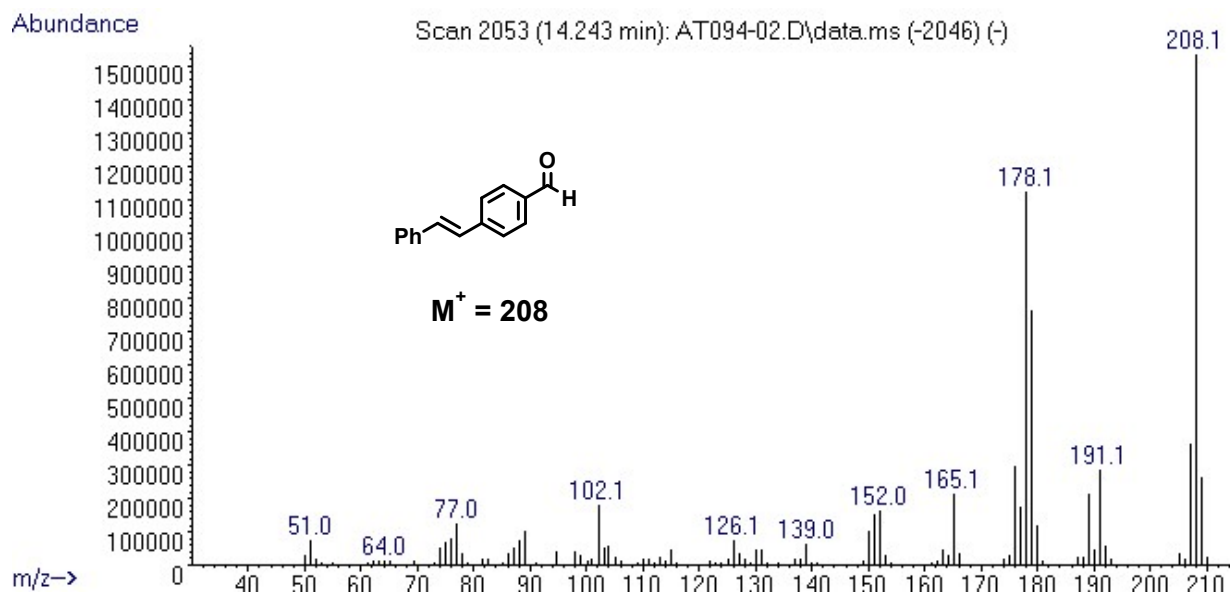

**Figure S24.** MS for *(E)*-4-styrylbenzaldehyde (**2a**) detected by GC

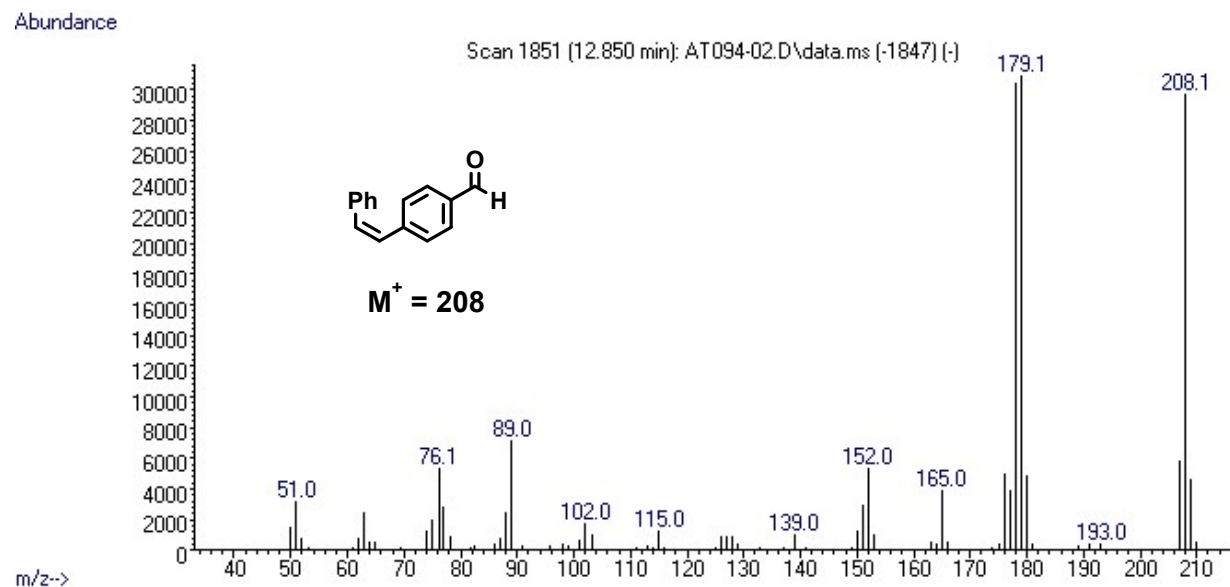

**Figure S25.** MS for *(Z)*-4-styrylbenzaldehyde (**2b**) detected by GC

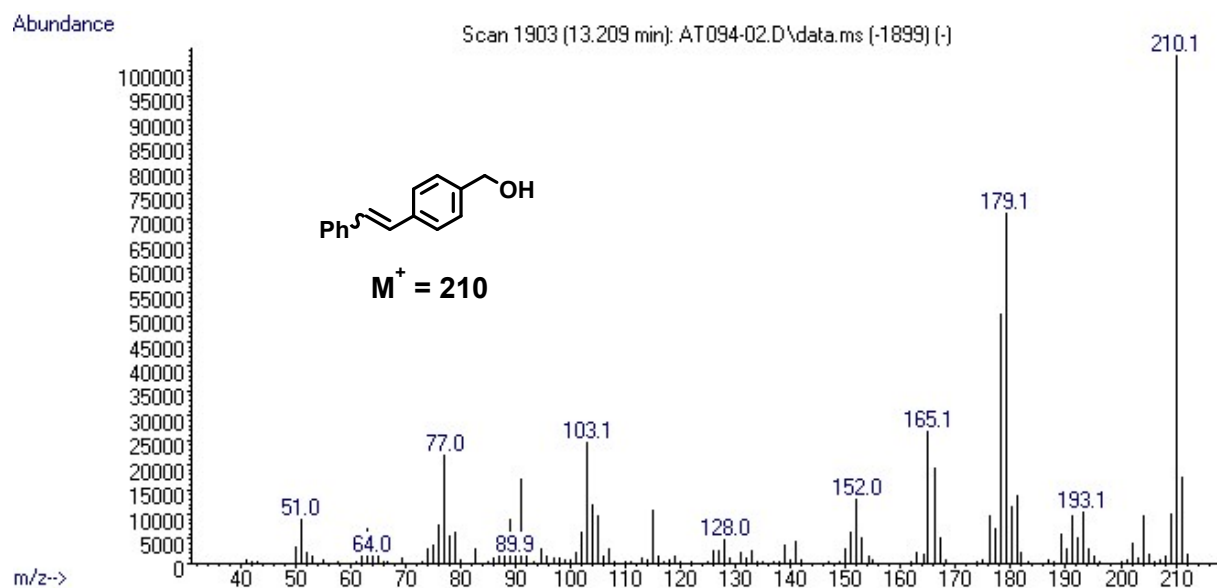

**Figure S26.** MS for (4-styrylphenyl)methanol detected by GC

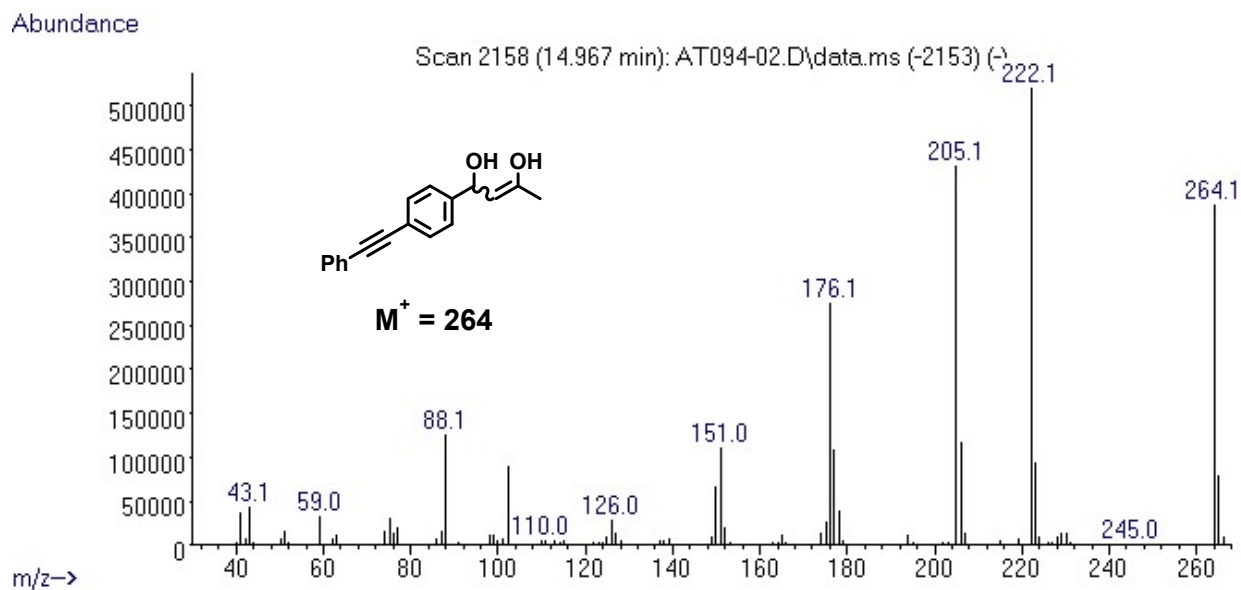

**Figure S27.** MS for 1-(4-(phenylethynyl)phenyl)but-2-ene-1,3-diol detected by GC

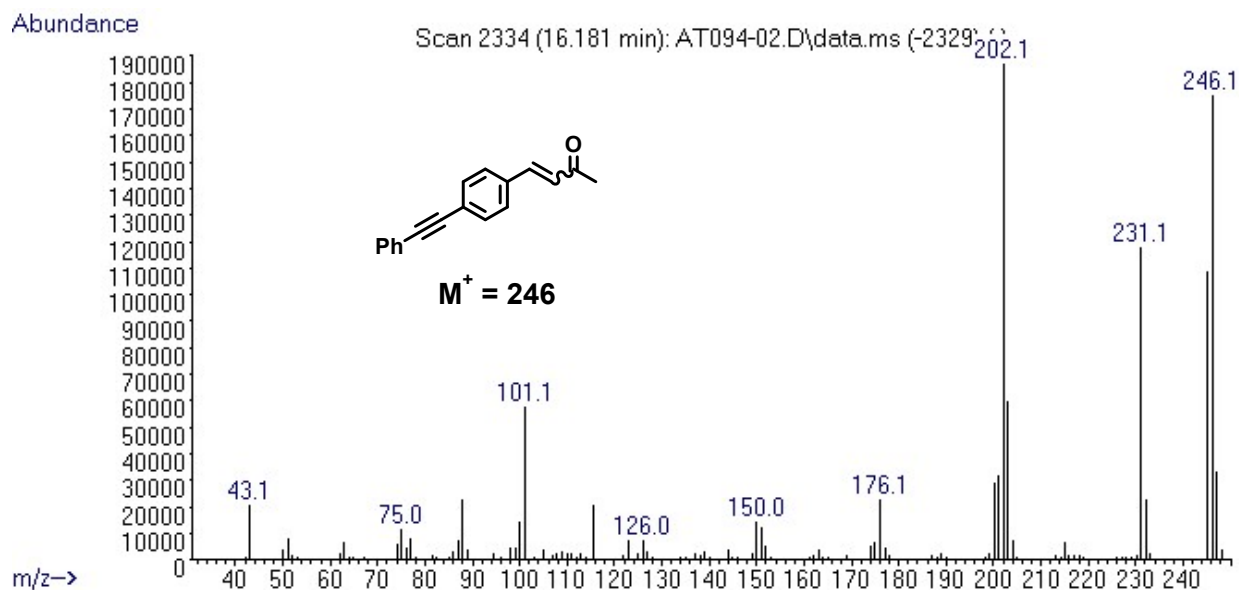

**Figure S28.** MS for 4-(4-(phenylethynyl)phenyl)but-3-en-2-one detected by GC

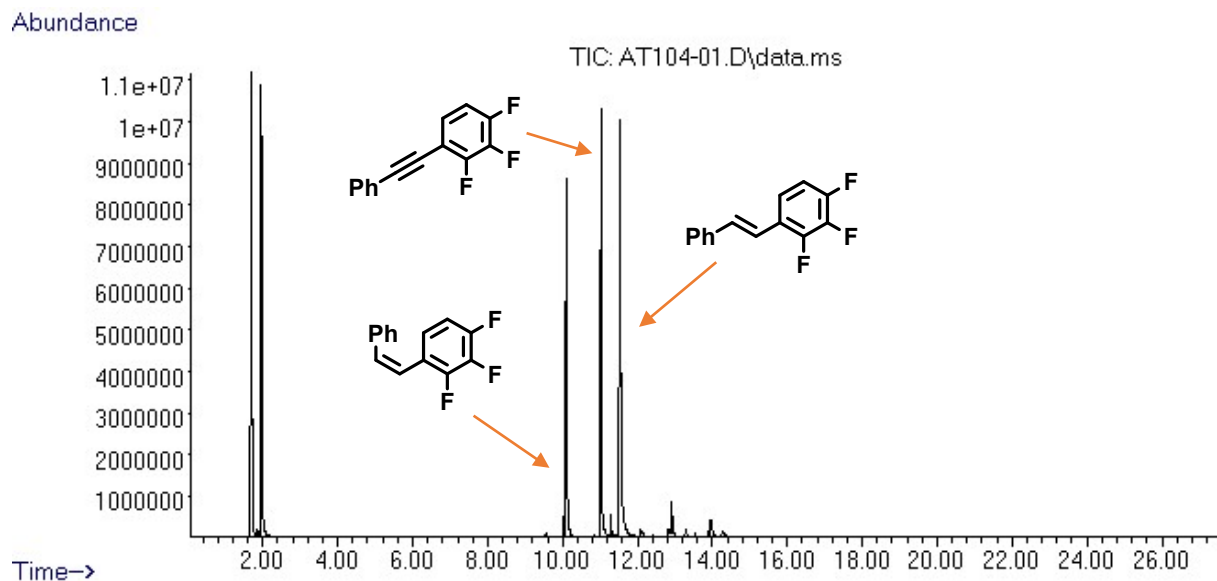

**Figure S29.** GC of the crude mixture of 1,2,3-trifluoro-4-(phenylethynyl)benzene (**3**) transfer semihydrogenation with iPrOH catalyzed by **Mn-2**

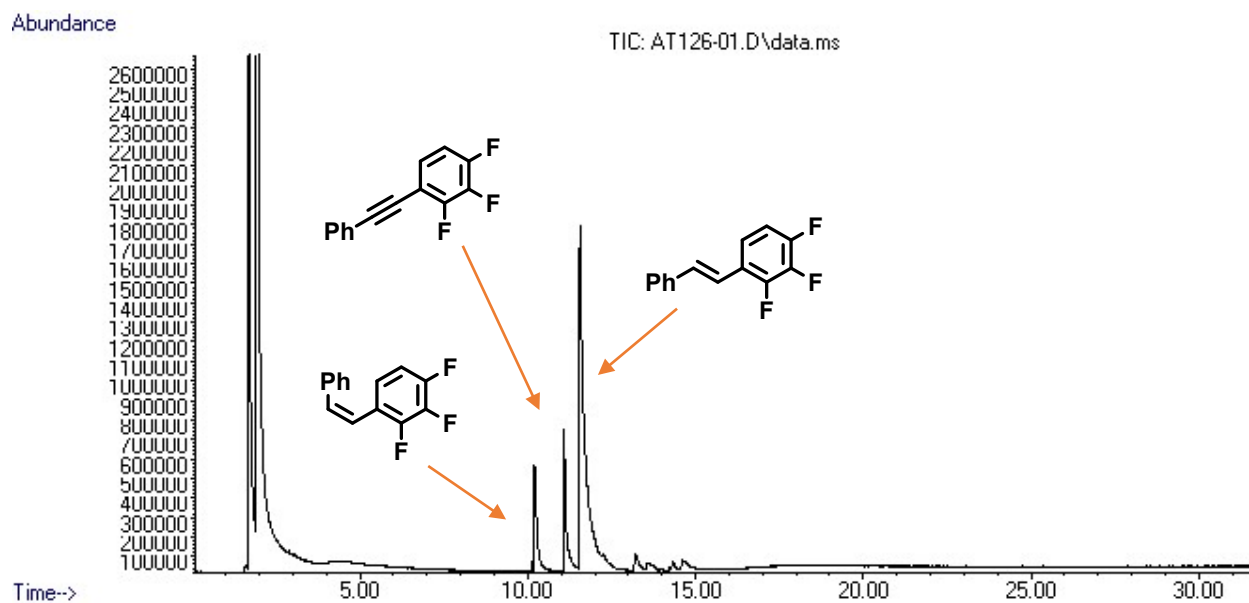

**Figure S30.** GC of the crude mixture of 1,2,3-trifluoro-4-(phenylethynyl)benzene (**3**) transfer semihydrogenation with iPrOH catalyzed by **Mn-2** after heating at 100 °C for 16 h

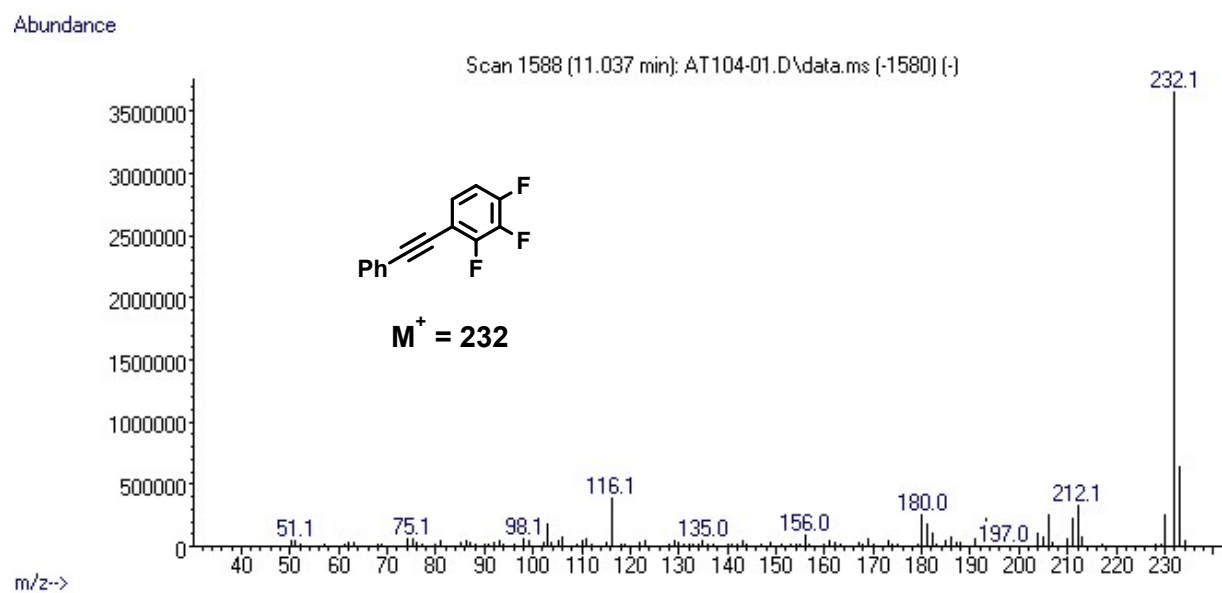

**Figure S31.** MS for 1,2,3-trifluoro-4-(phenylethynyl)benzene (**3**) detected by GC

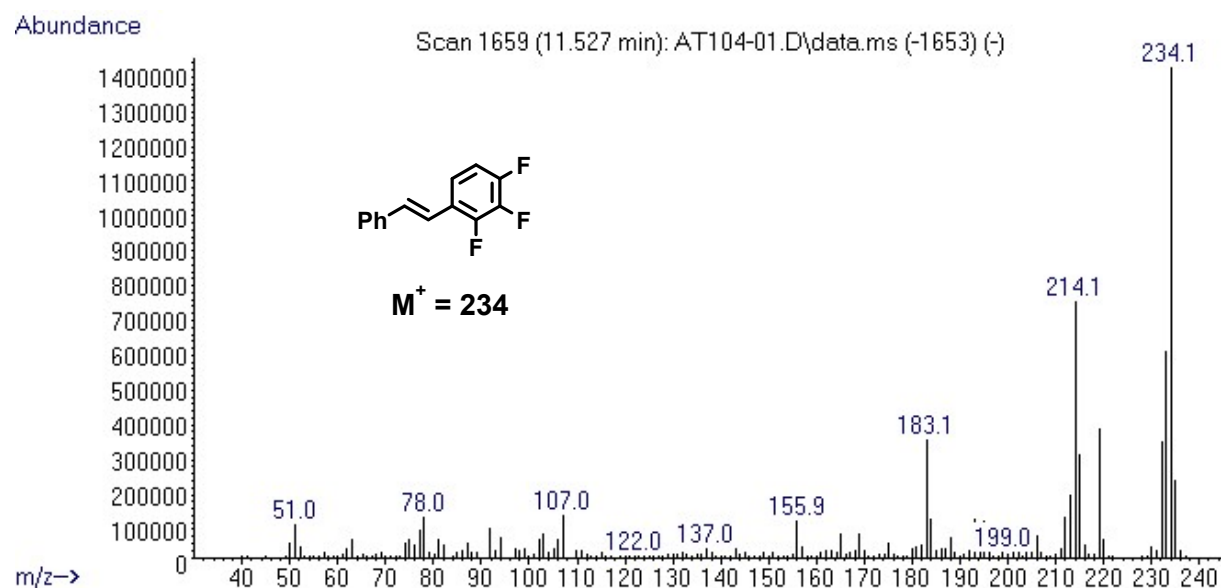

**Figure S32.** MS for (*E*)-1,2,3-trifluoro-4-styrylbenzene (**3a**) detected by GC

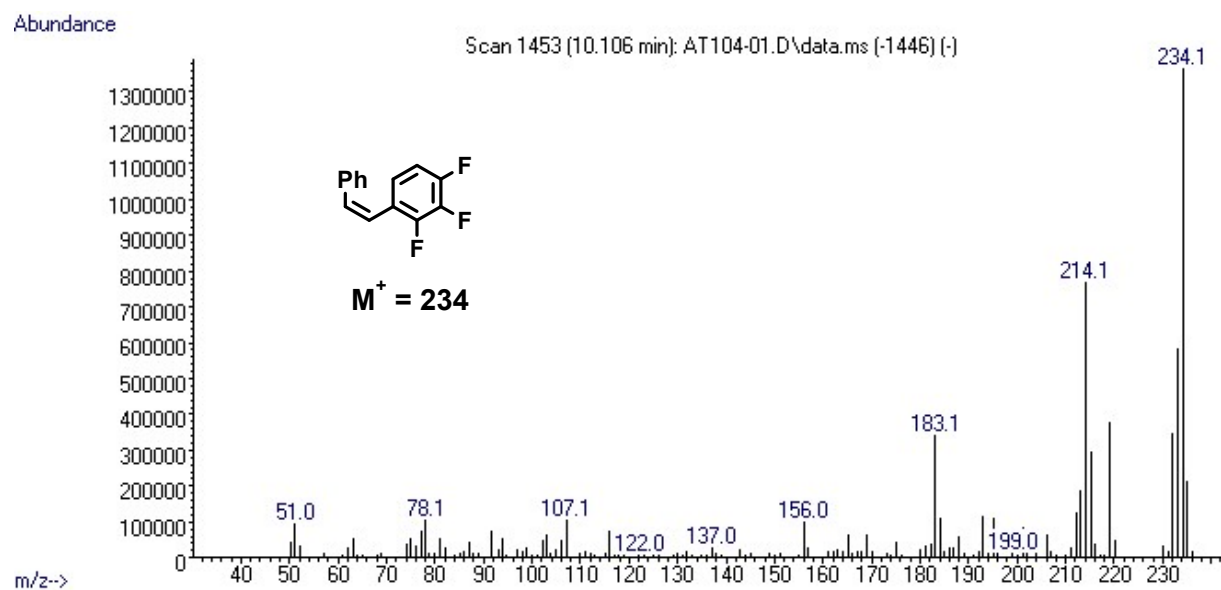

**Figure S33.** MS for (*Z*)-1,2,3-trifluoro-4-styrylbenzene (**3b**) detected by GC

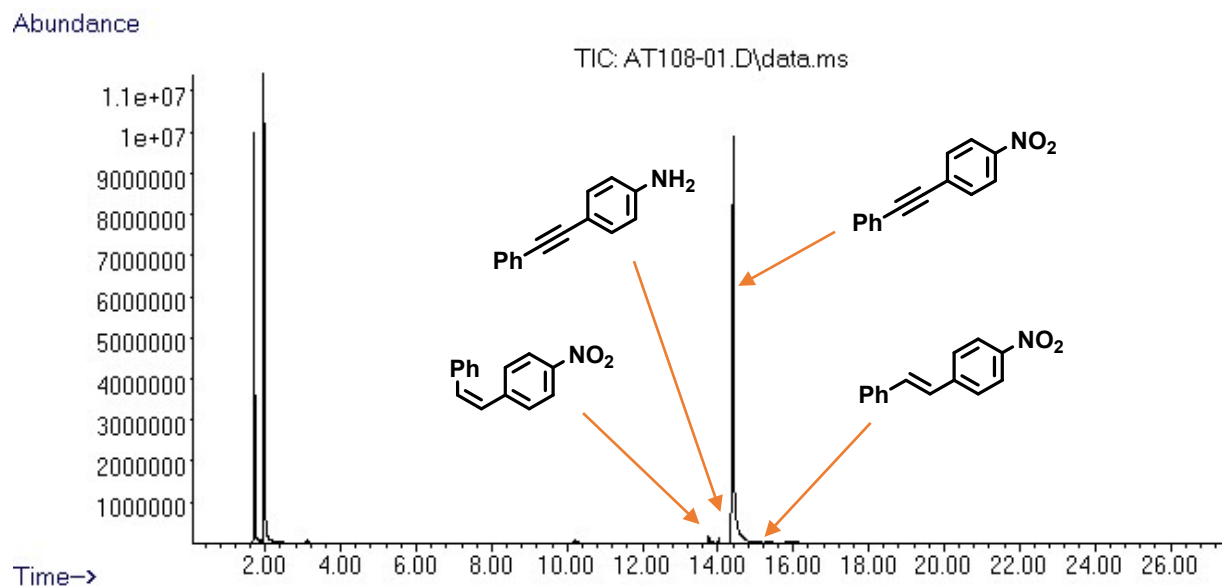

**Figure S34.** GC of the crude mixture of 1-nitro-4-(phenylethynyl)benzene (**4**) transfer semihydrogenation with iPrOH catalyzed by **Mn-2**

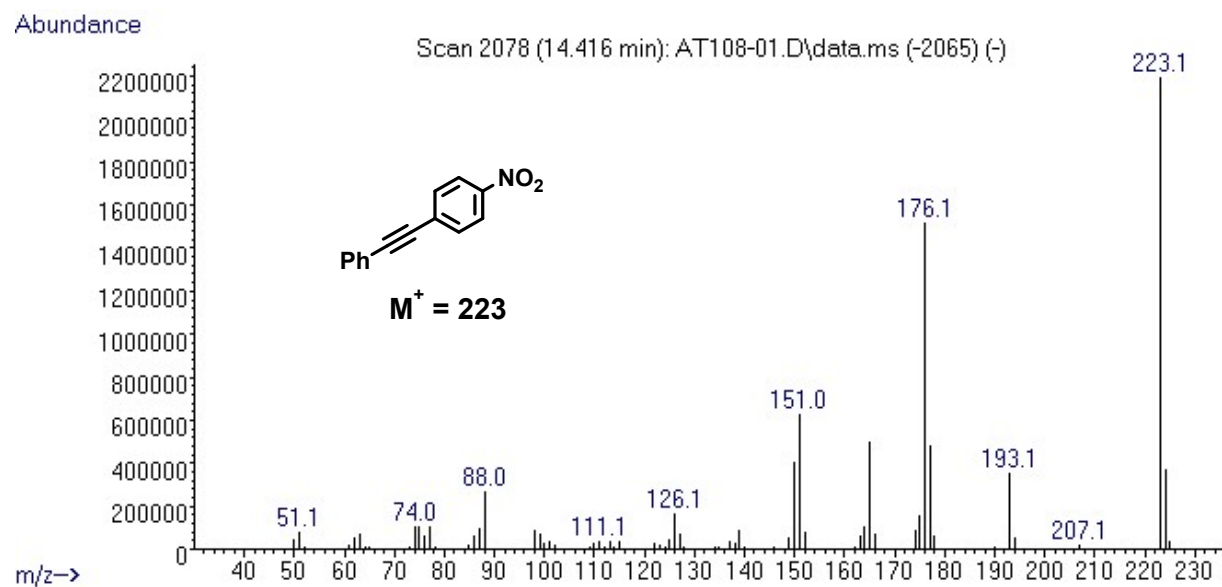

**Figure S35.** MS for 1-nitro-4-(phenylethynyl)benzene (**4**) detected by GC

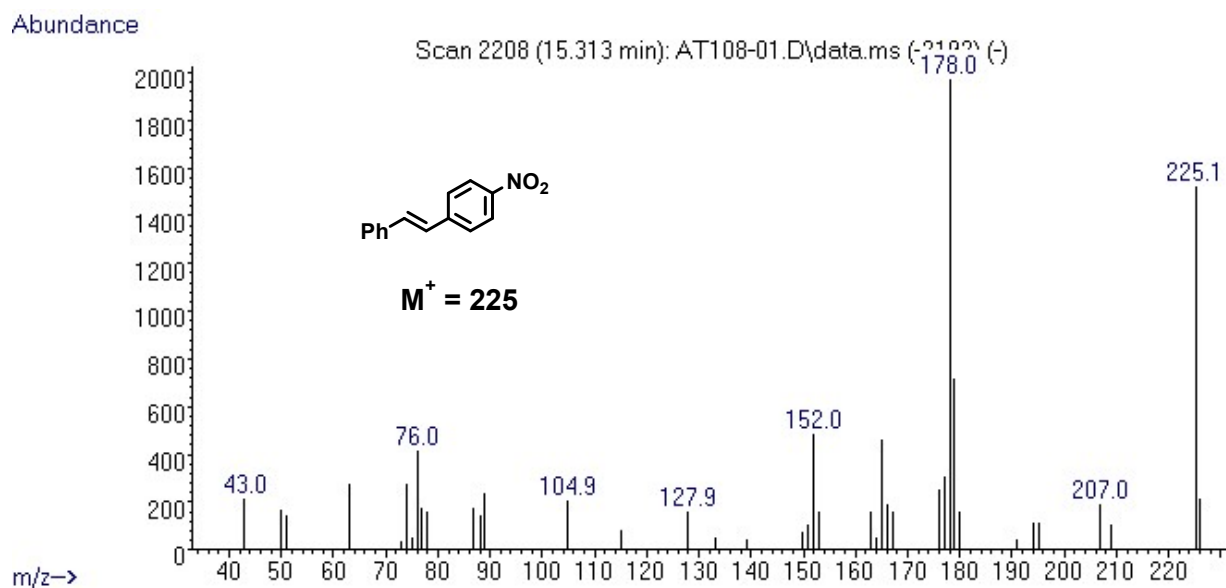

**Figure S36.** MS for (*E*)-1-nitro-4-styrylbenzene (**4a**) detected by GC

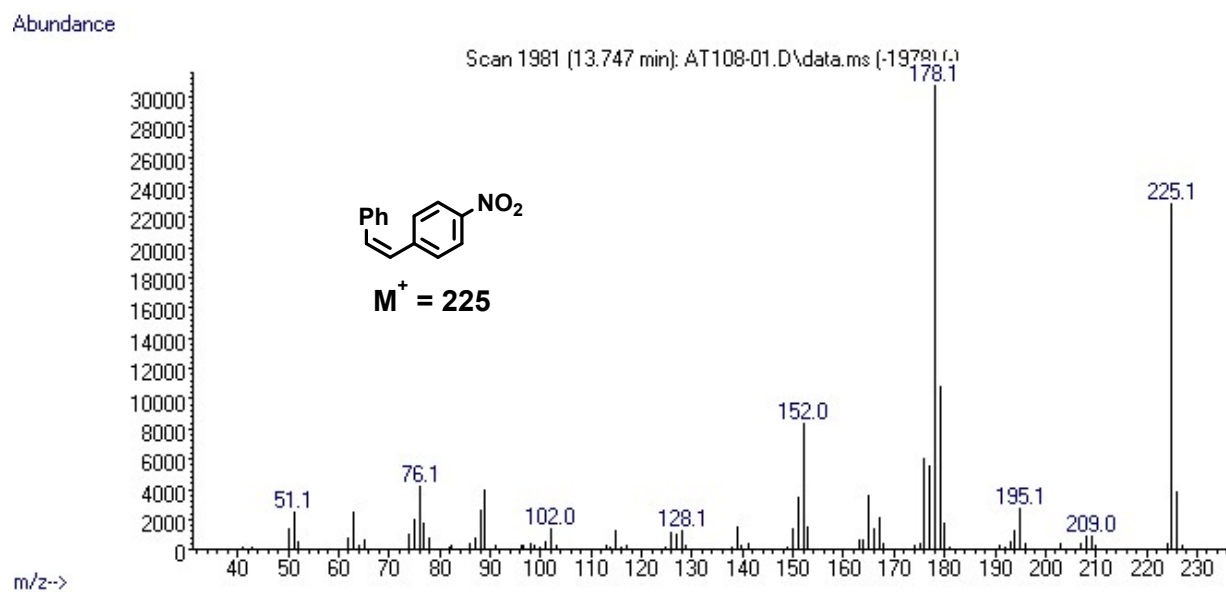

**Figure S37.** MS for (*Z*)-1-nitro-4-styrylbenzene (**4b**) detected by GC

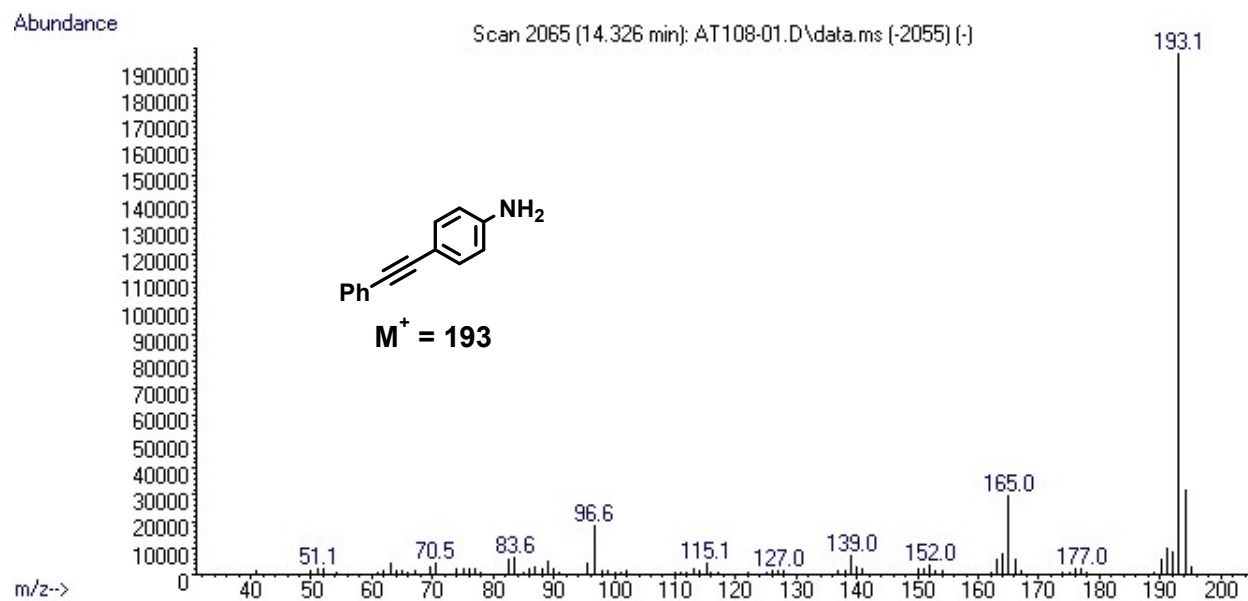

**Figure S38.** MS for 4-(phenylethynyl)aniline detected by GC

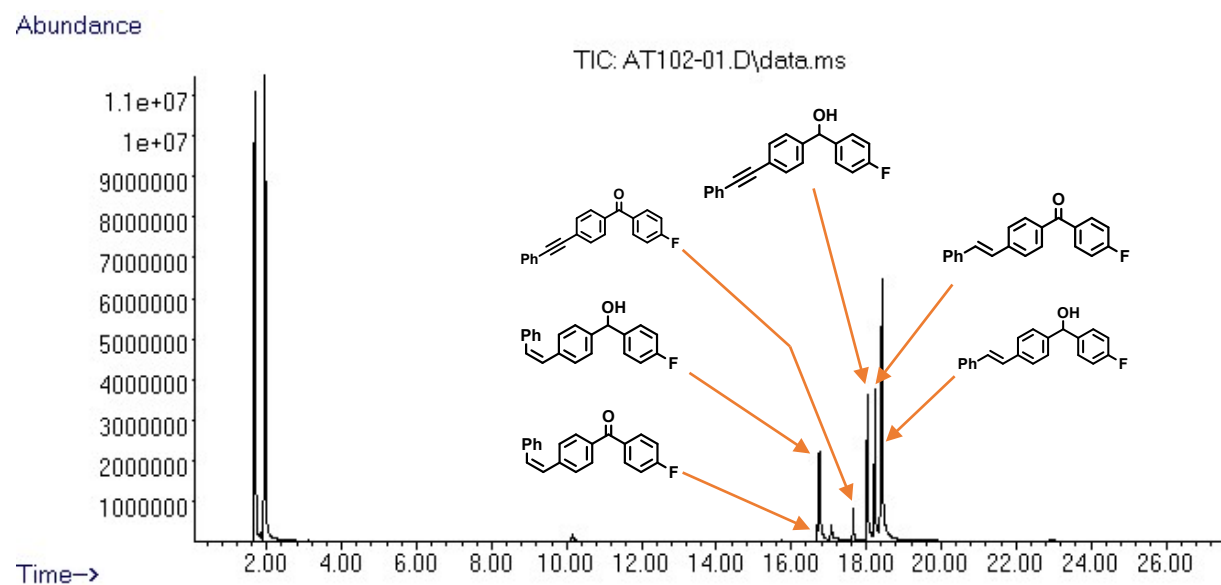

**Figure S39.** GC of the crude mixture of 4-fluoro-4'-(phenylethynyl)-benzophenone (**5**) transfer semihydrogenation with iPrOH catalyzed by **Mn-2**

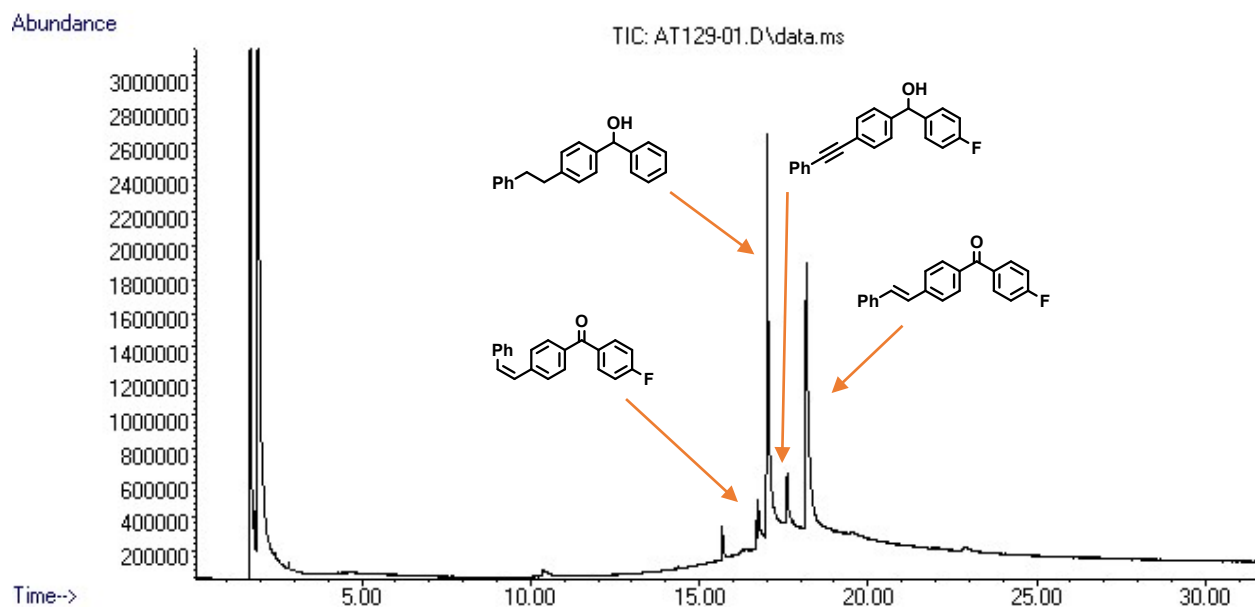

**Figure S40.** GC of the crude mixture of 4-fluoro-4'-(phenylethynyl)-benzophenone (**5**) transfer semihydrogenation with iPrOH catalyzed by **Mn-2** after heating at 100 °C for 16 h

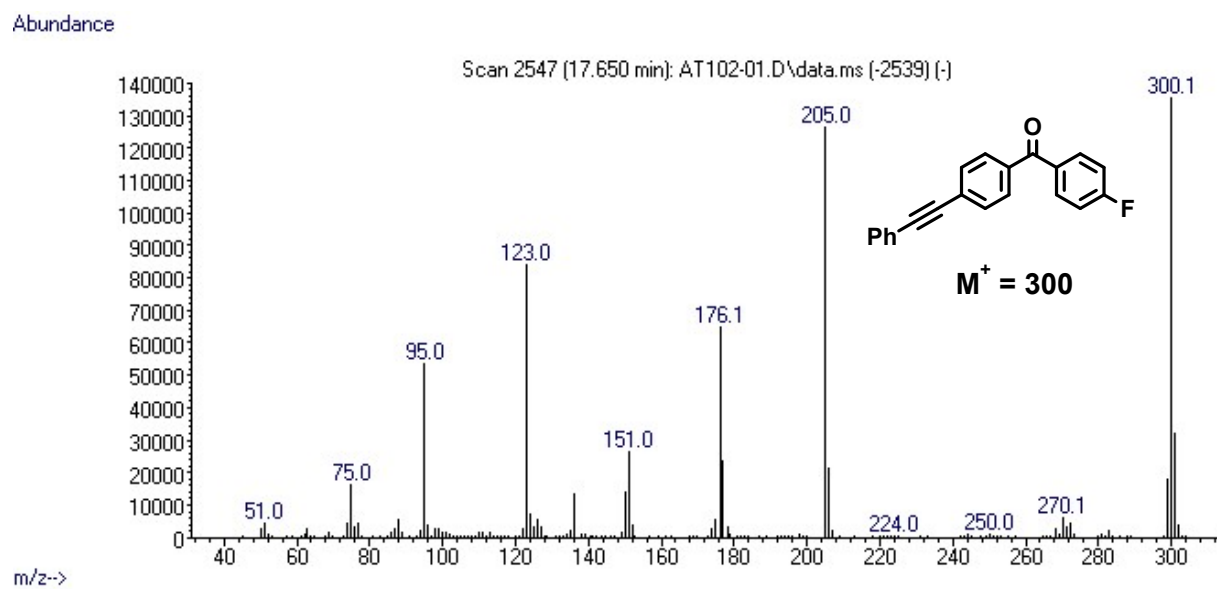

**Figure S41.** MS for 4-fluoro-4'-(phenylethynyl)-benzophenone (**5**) detected by GC

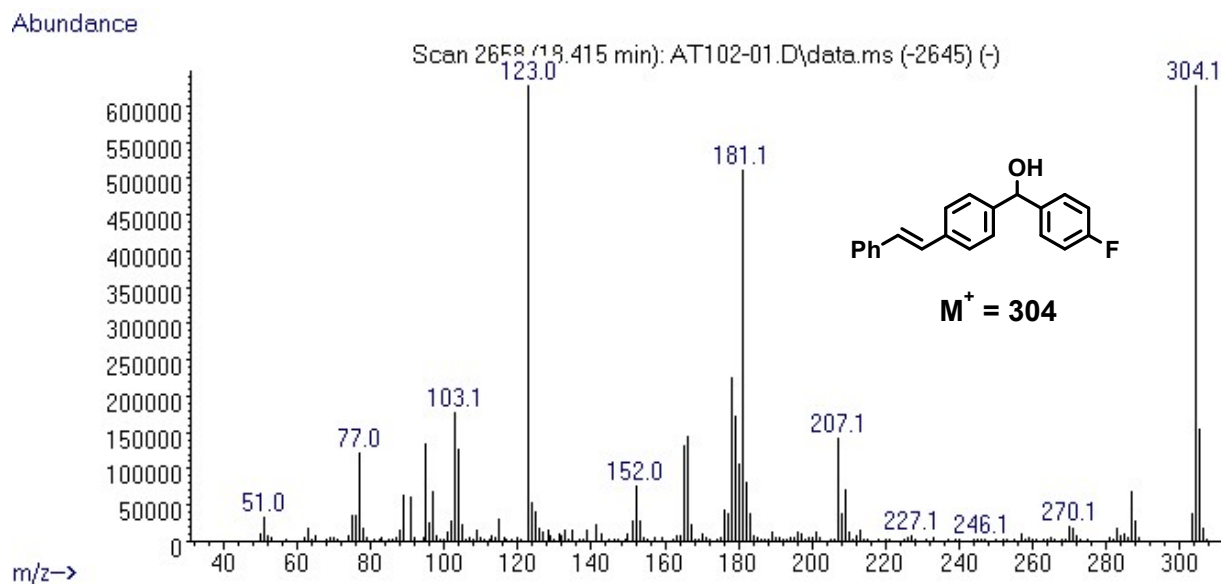

**Figure S42.** MS for (*E*)-(4-fluorophenyl)(4-styrylphenyl)methanol (**5a**) detected by GC

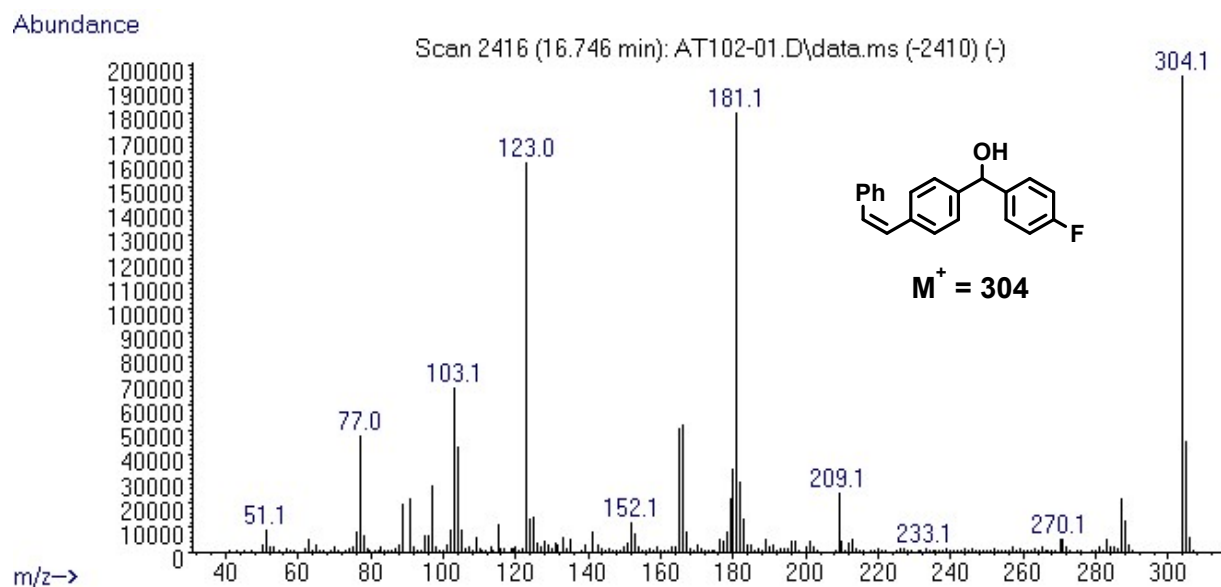

**Figure S43.** MS for (*Z*)-(4-fluorophenyl)(4-styrylphenyl)methanol (**5b**) detected by GC

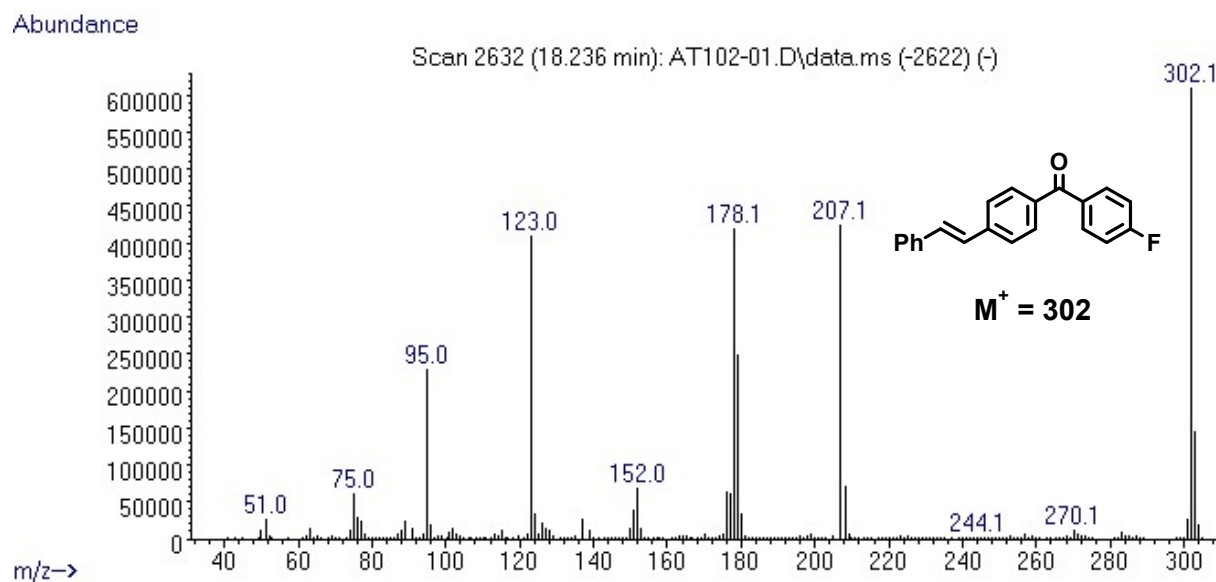

**Figure S44.** MS for (*E*)-(4-fluorophenyl)(4-styrylphenyl)methanone (**5a'**) detected by GC

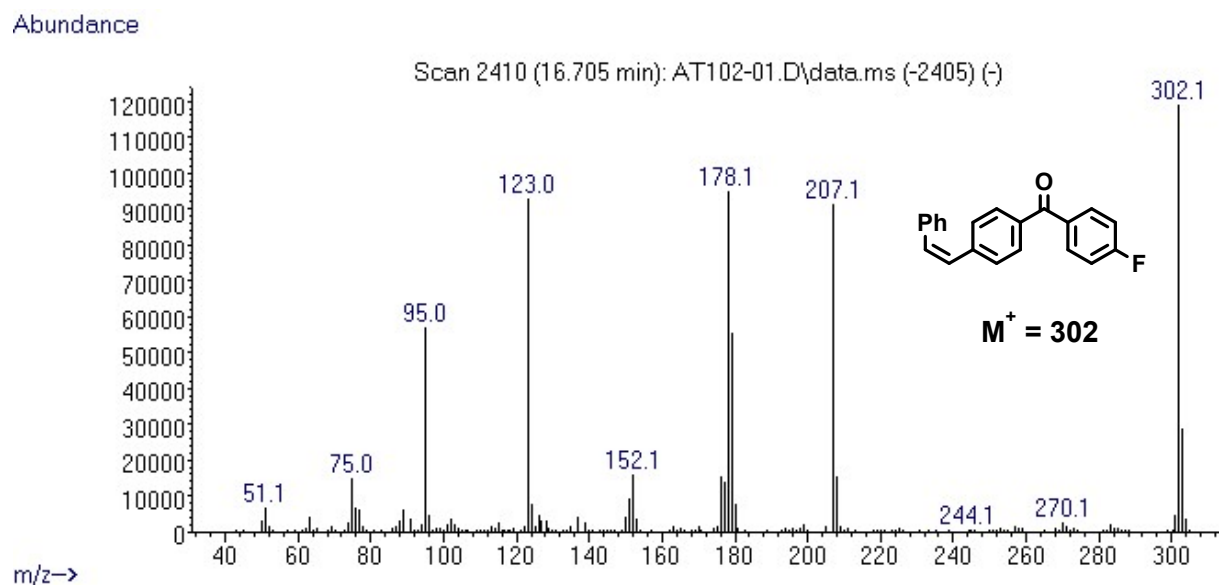

**Figure S45.** MS for (*Z*)-(4-fluorophenyl)(4-styrylphenyl)methanone (**5b'**) detected by GC

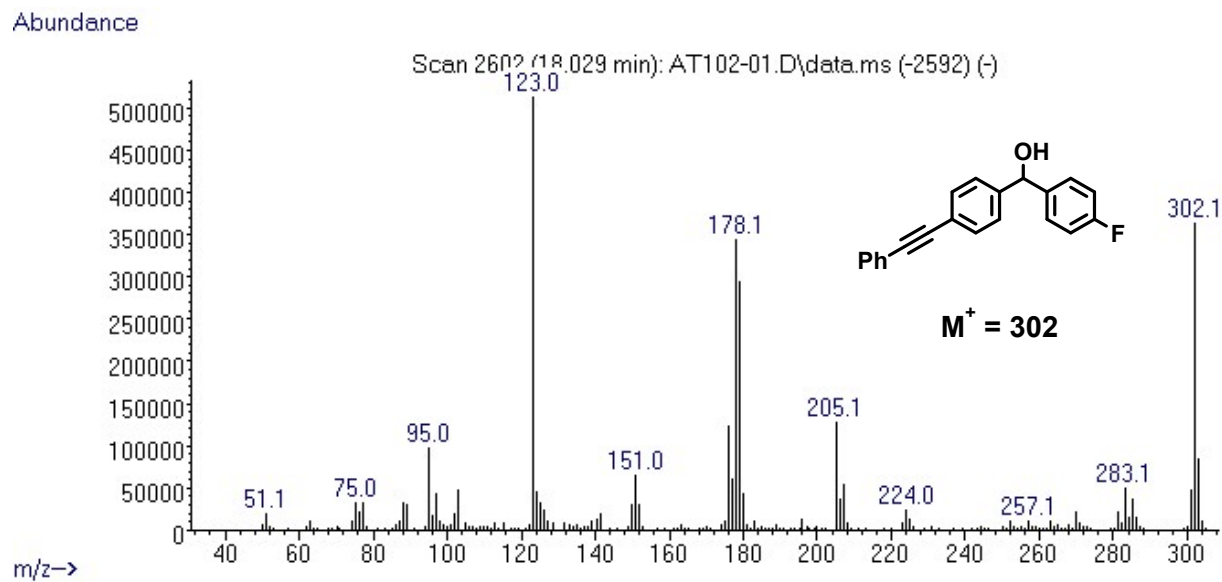

**Figure S46.** MS for (4-fluorophenyl)(4-(phenylethynyl)phenyl)methanol detected by GC

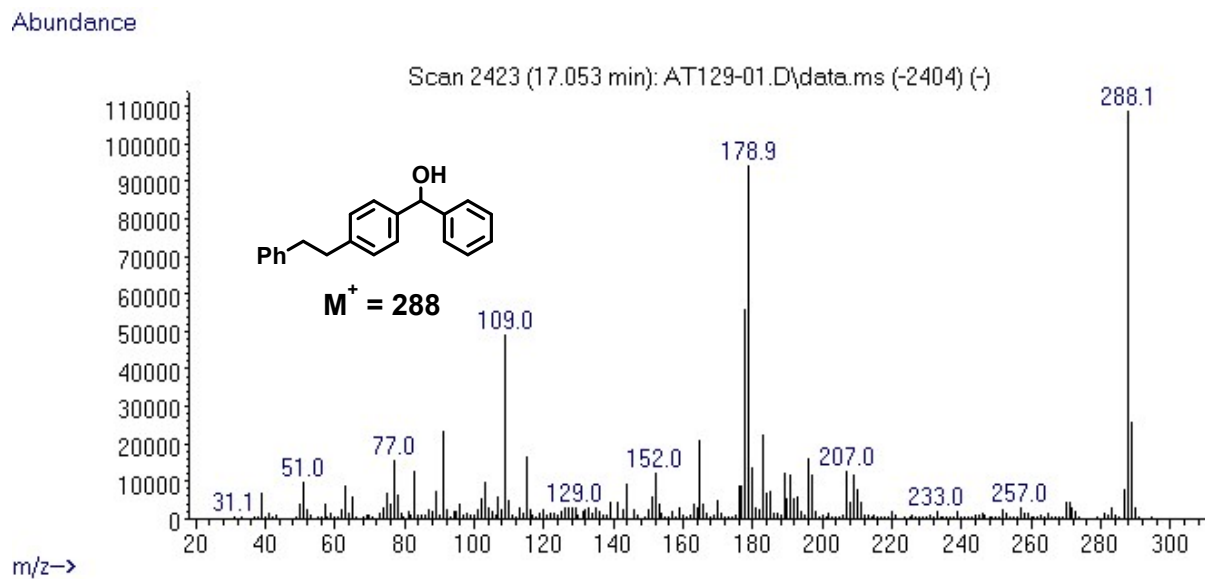

**Figure S47.** MS for (4-phenethylphenyl)(phenyl)methanol detected by GC

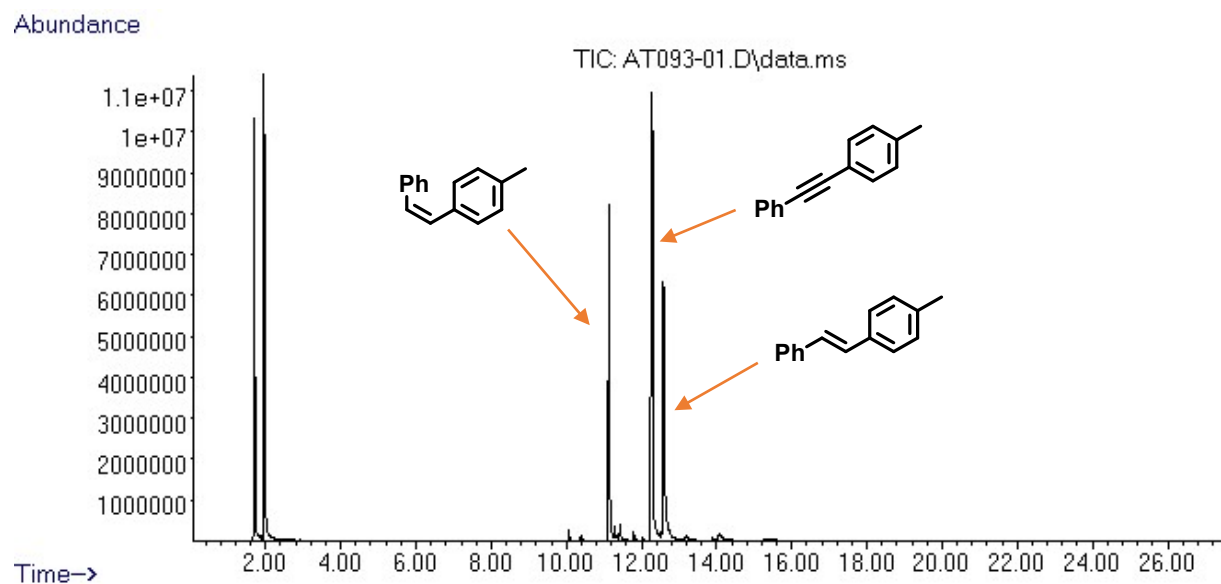

**Figure S48.** GC of the crude mixture of 1-methyl-4-(phenylethynyl)benzene (**6**) transfer semihydrogenation with iPrOH catalyzed by **Mn-2**

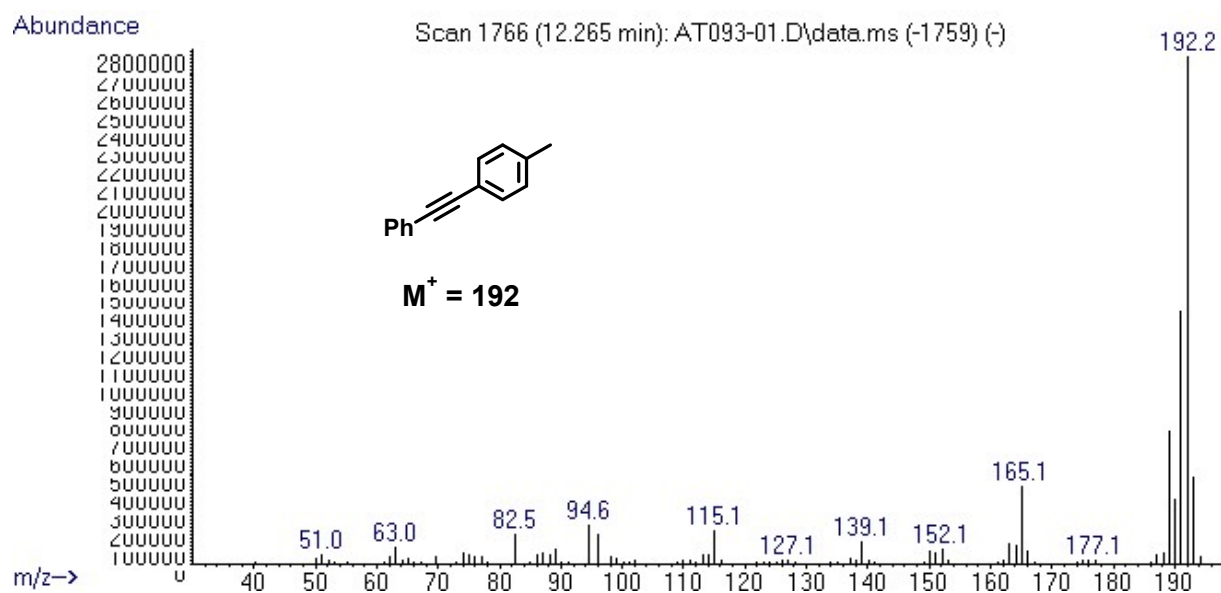

**Figure S49.** MS for 1-methyl-4-(phenylethynyl)benzene (**6**) detected by GC

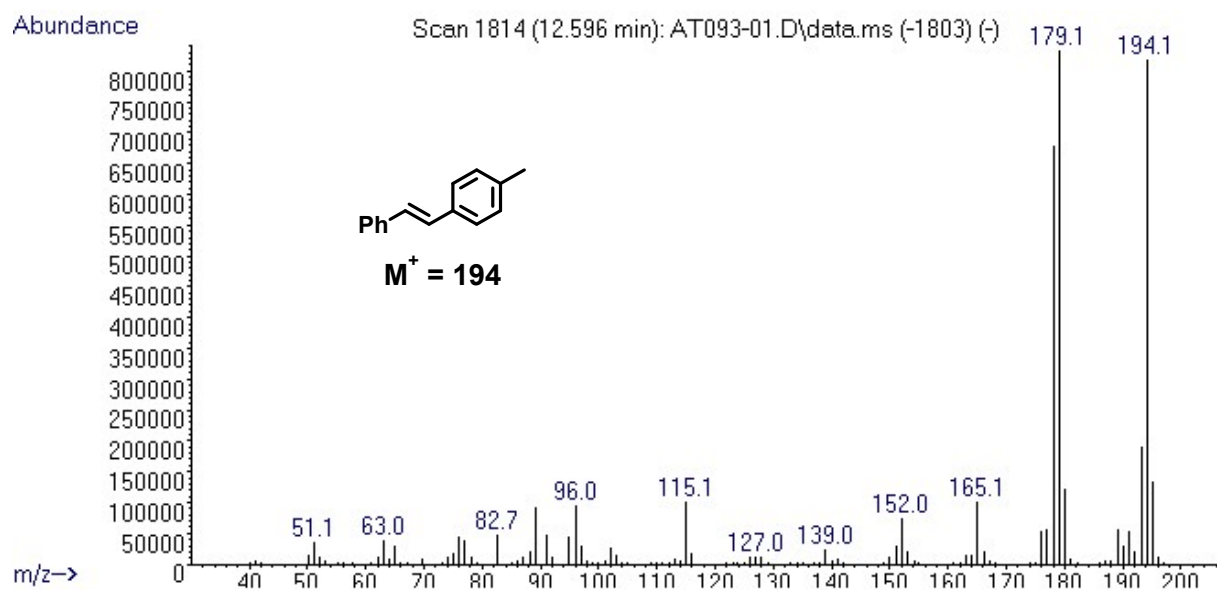

**Figure S50.** MS for (*E*)-1-methyl-4-styrylbenzene (**6a**) detected by GC

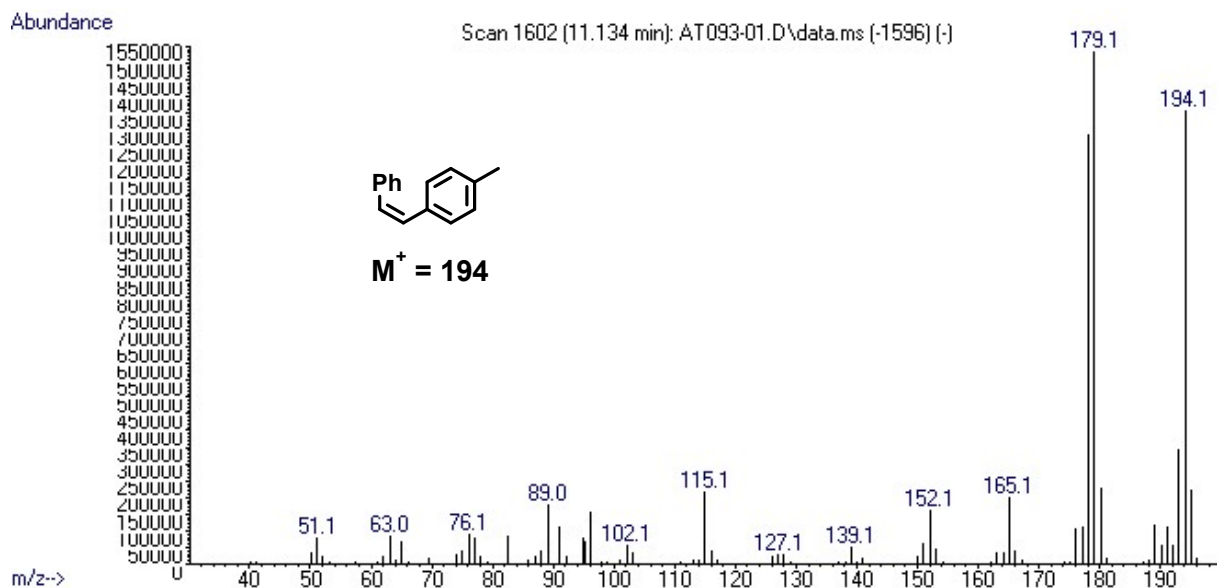

**Figure S51.** MS for (*Z*)-1-methyl-4-styrylbenzene (**6b**) detected by GC

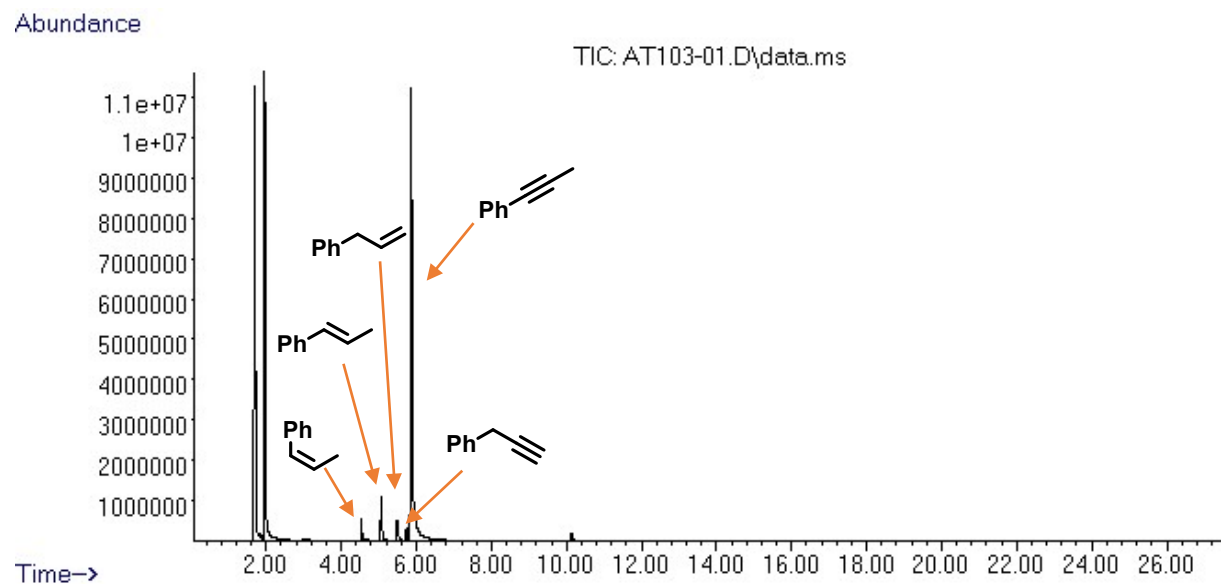

**Figure S52.** GC of the crude mixture of 1-phenyl-1-propyne (**7**) transfer semihydrogenation with iPrOH catalyzed by **Mn-2**

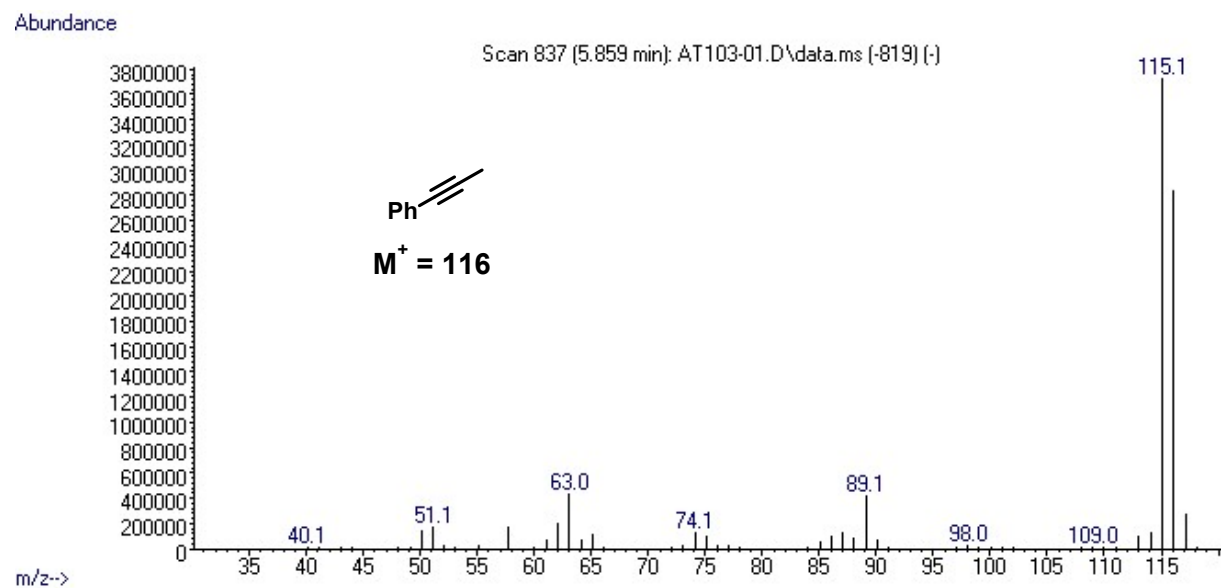

**Figure S53.** MS for 1-phenyl-1-propyne (**7**) detected by GC

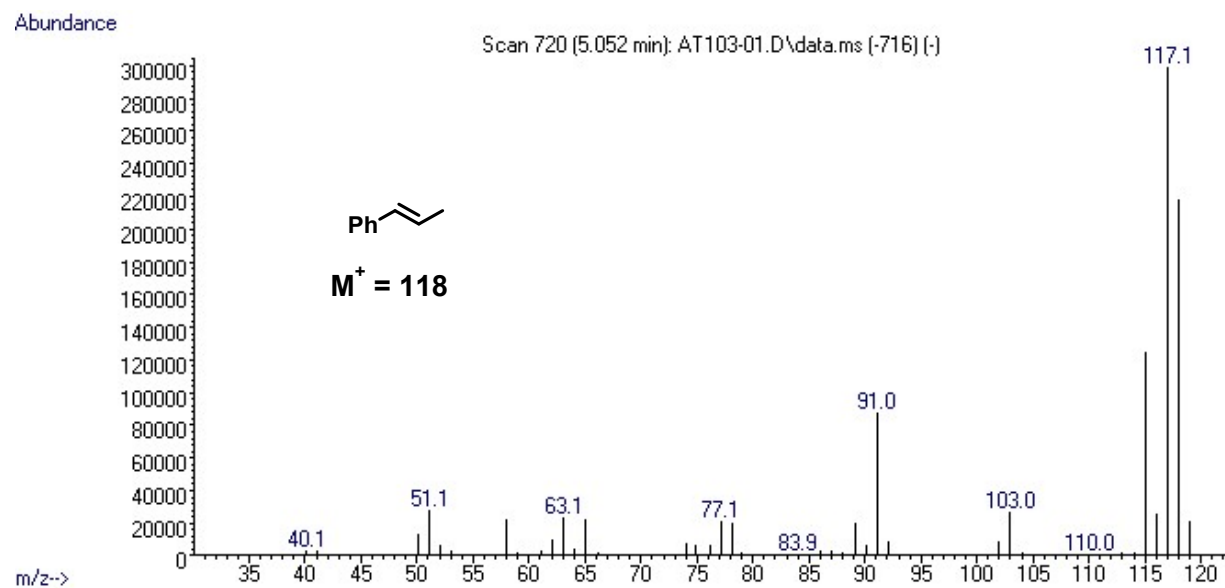

**Figure S54.** MS for (*E*)-prop-1-en-1-ylbenzene (**7a**) detected by GC

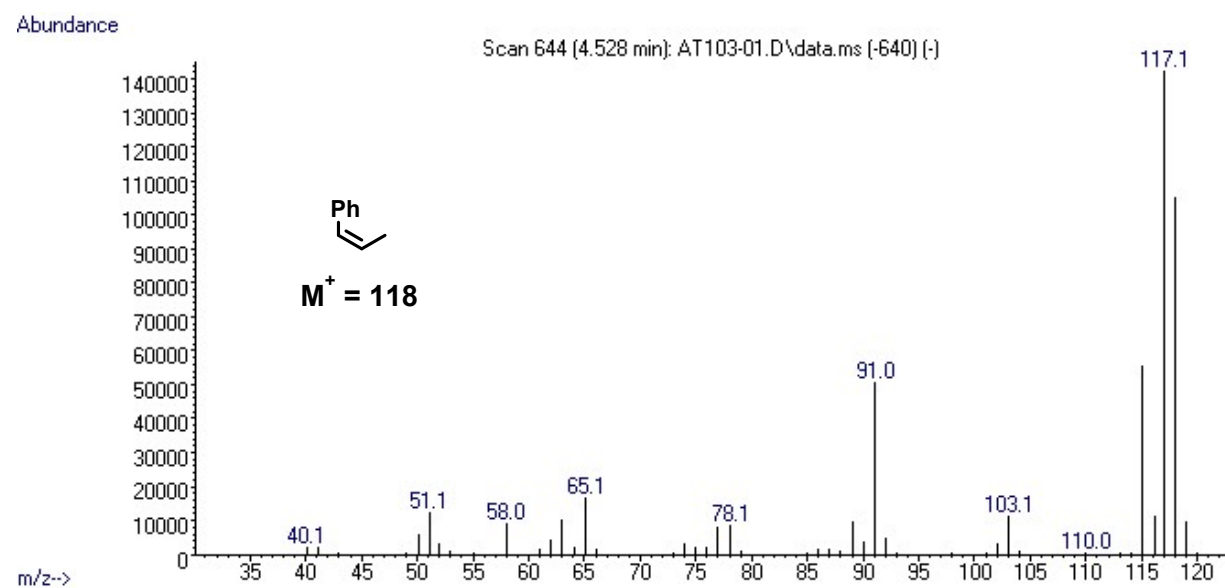

**Figure S55.** MS for (*Z*)-prop-1-en-1-ylbenzene (**7b**) detected by GC

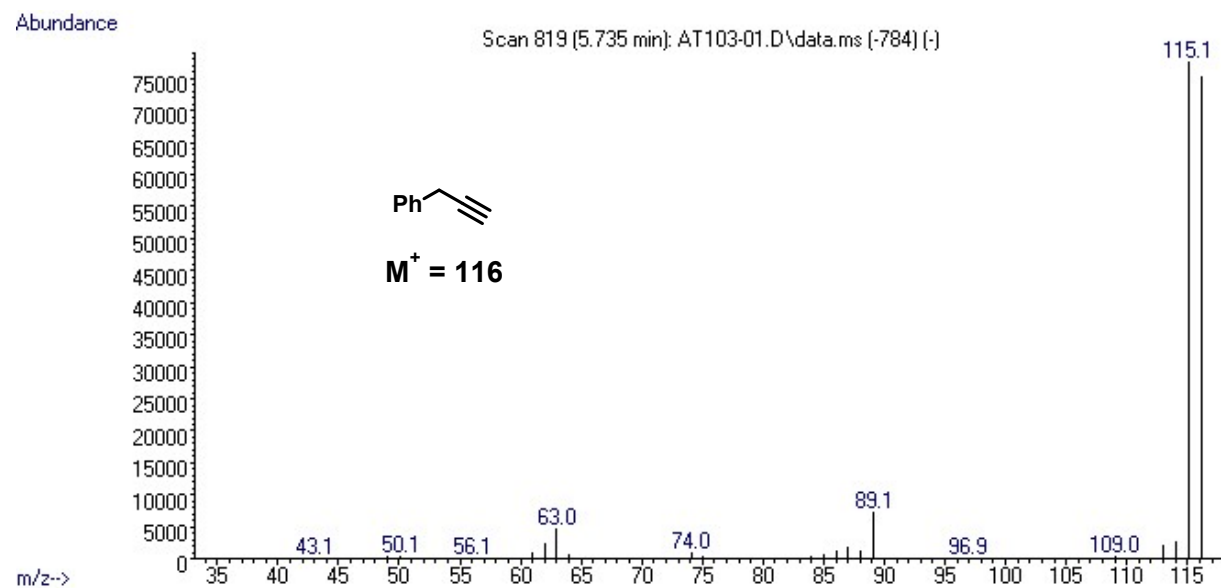

**Figure S56.** MS for 3-phenyl-1-propyne detected by GC

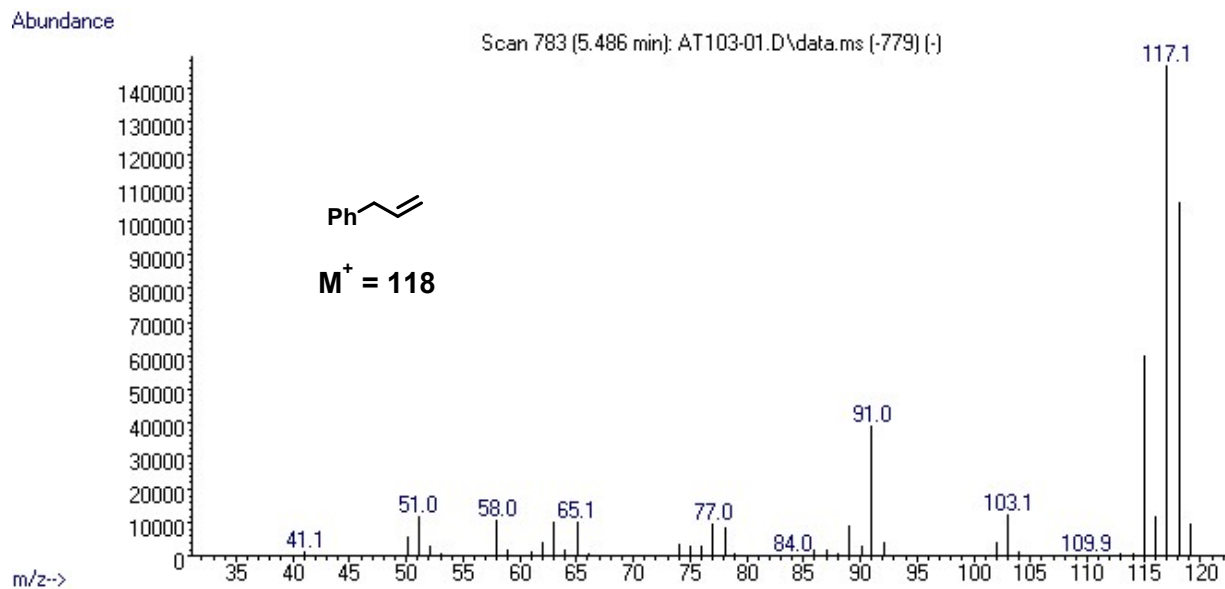

**Figure S57.** MS for allylbenzene detected by GC

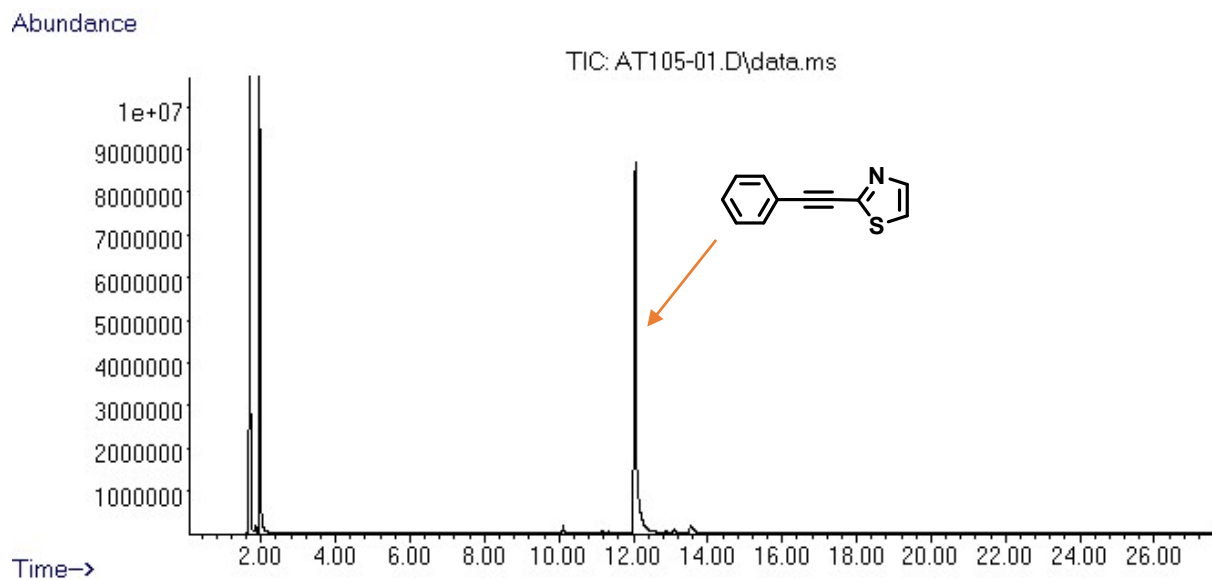

**Figure S58.** GC of the crude mixture of 2-(phenylethynyl)thiazole (**8**) transfer semihydrogenation with iPrOH catalyzed by **Mn-2**

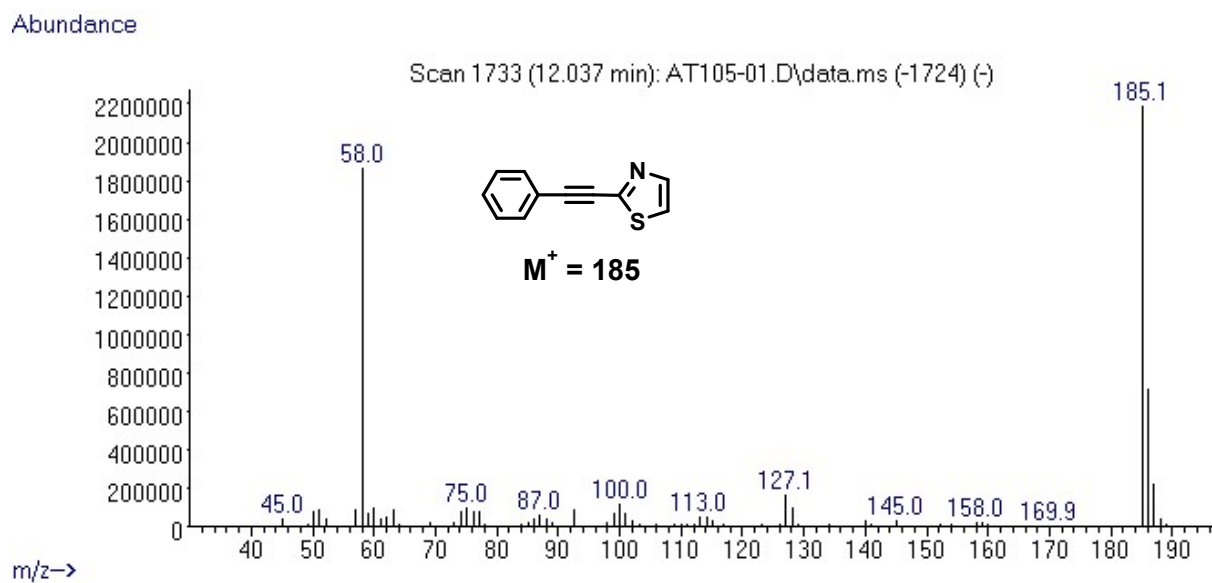

**Figure S59.** MS for 2-(phenylethynyl)thiazole (**8**) detected by GC

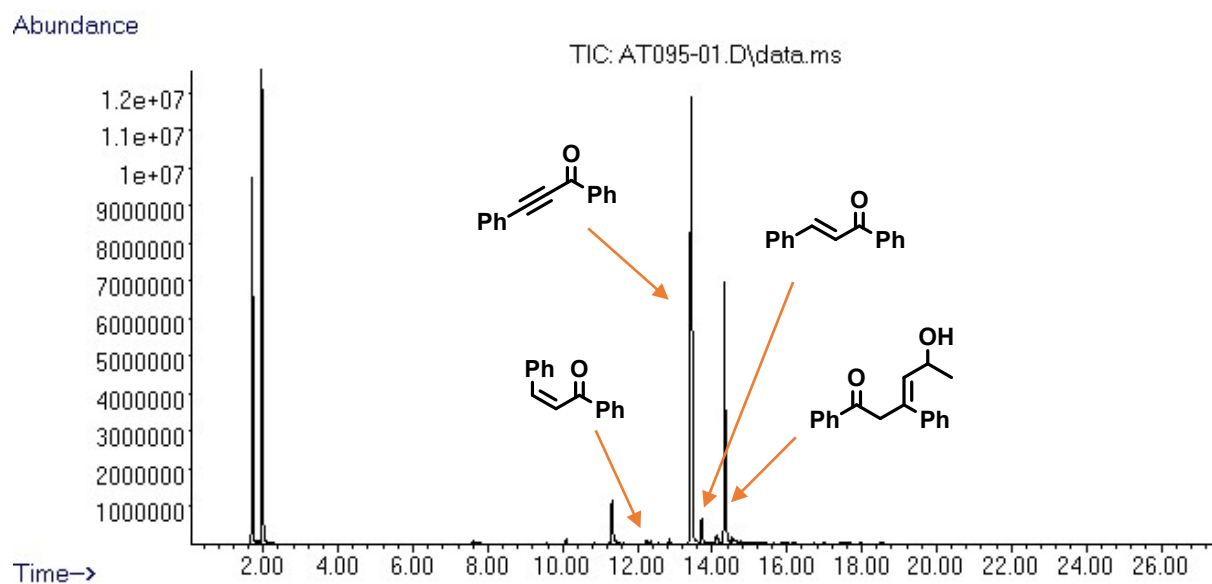

**Figure S60.** GC of the crude mixture of 1,3-diphenylprop-2-yn-1-one (**9**) transfer semihydrogenation with iPrOH catalyzed by **Mn-2**

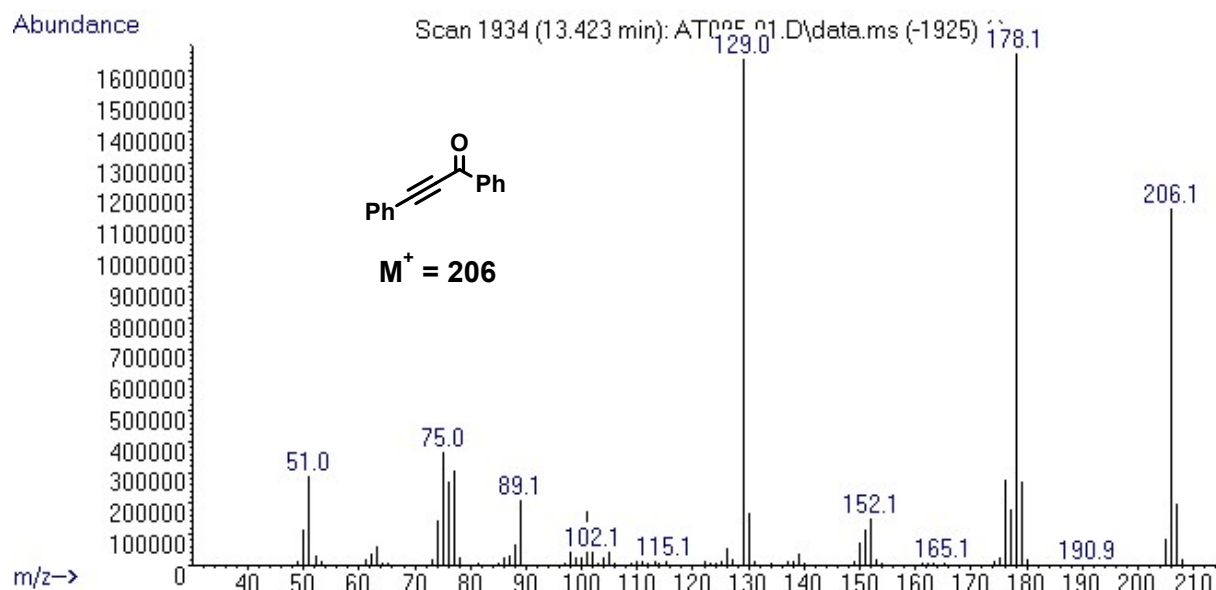

**Figure S61.** MS for 1,3-diphenylprop-2-yn-1-one (**9**) detected by GC

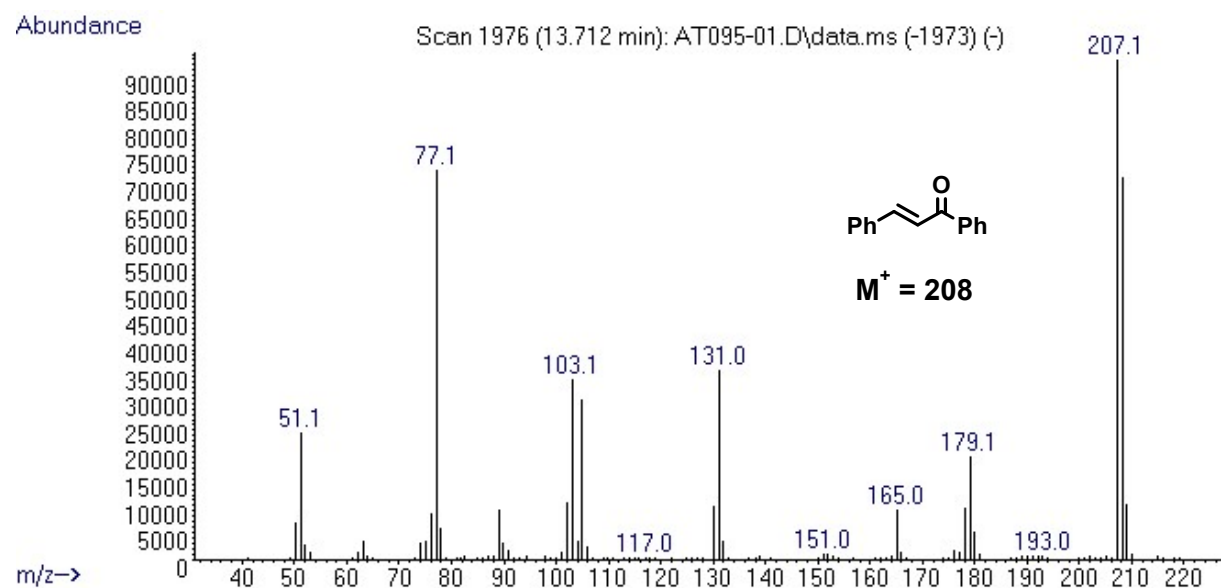

**Figure S62.** MS for (*E*)-chalcone (**9a**) detected by GC

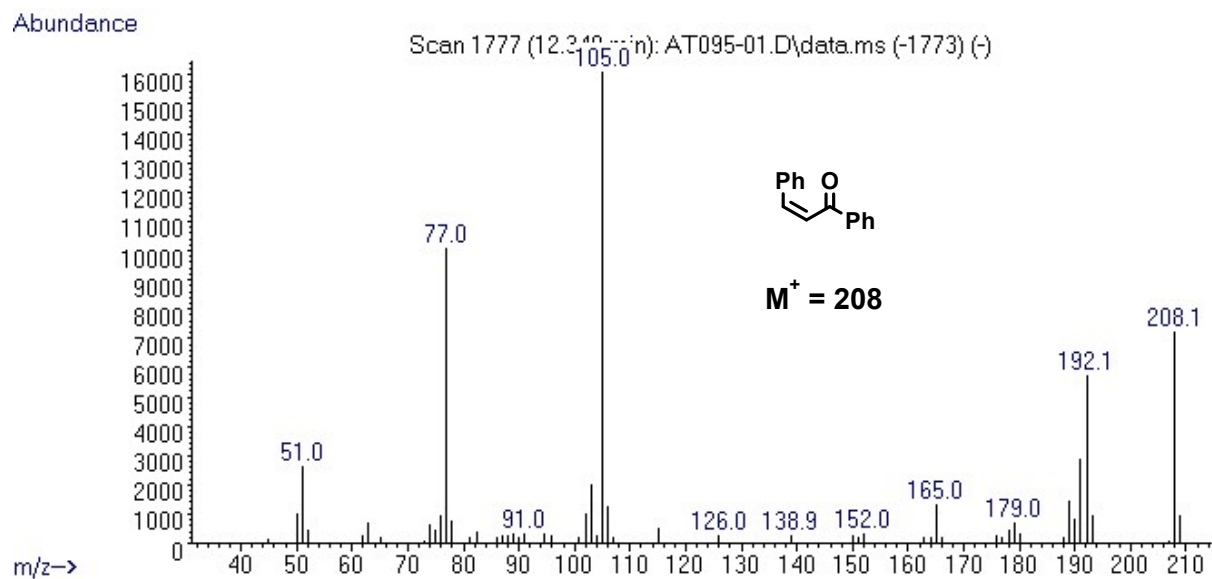

**Figure S63.** MS for (*Z*)-chalcone (**9b**) detected by GC

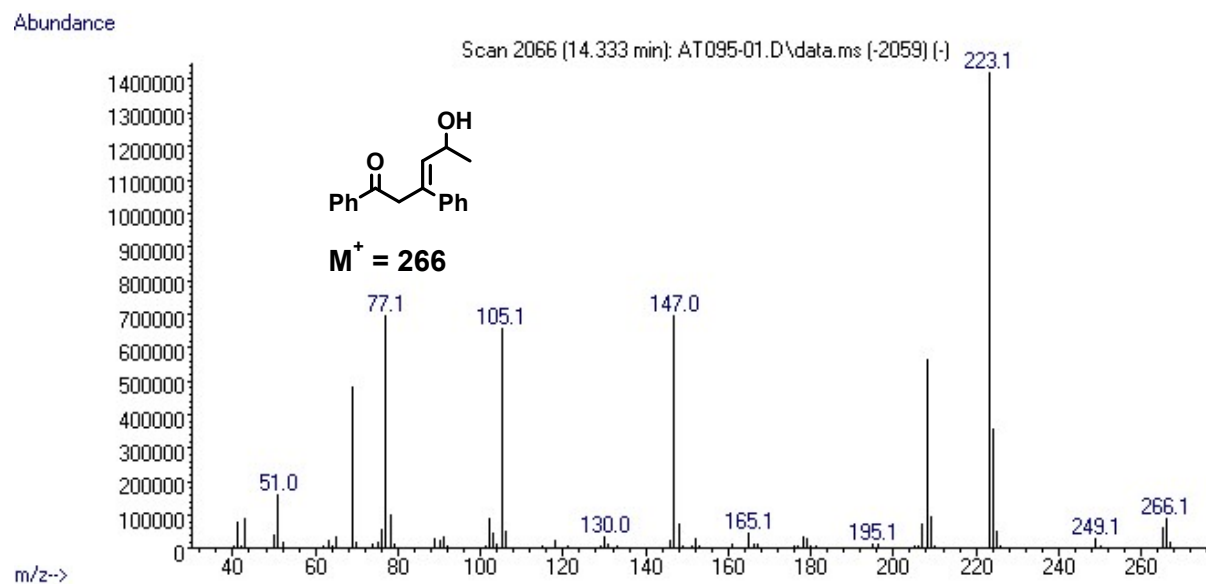

**Figure S64.** MS for 5-hydroxy-1,3-diphenylhex-3-en-1-one detected by GC

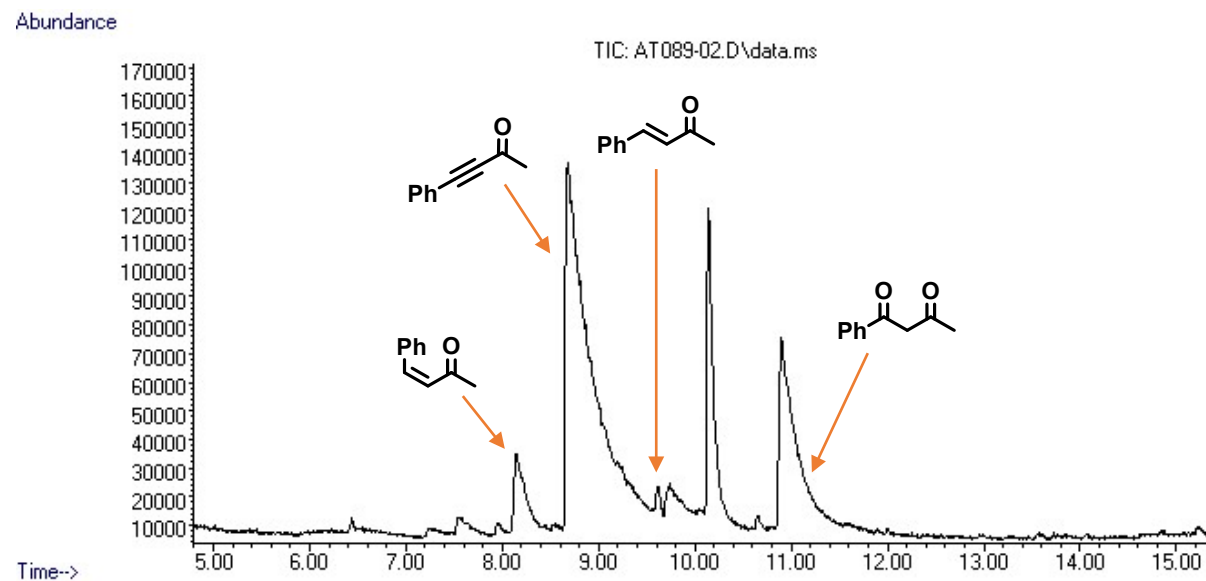

**Figure S65.** GC of the crude mixture of 4-phenyl-3-buten-2-one (**10**) transfer semihydrogenation with iPrOH catalyzed by **Mn-2**

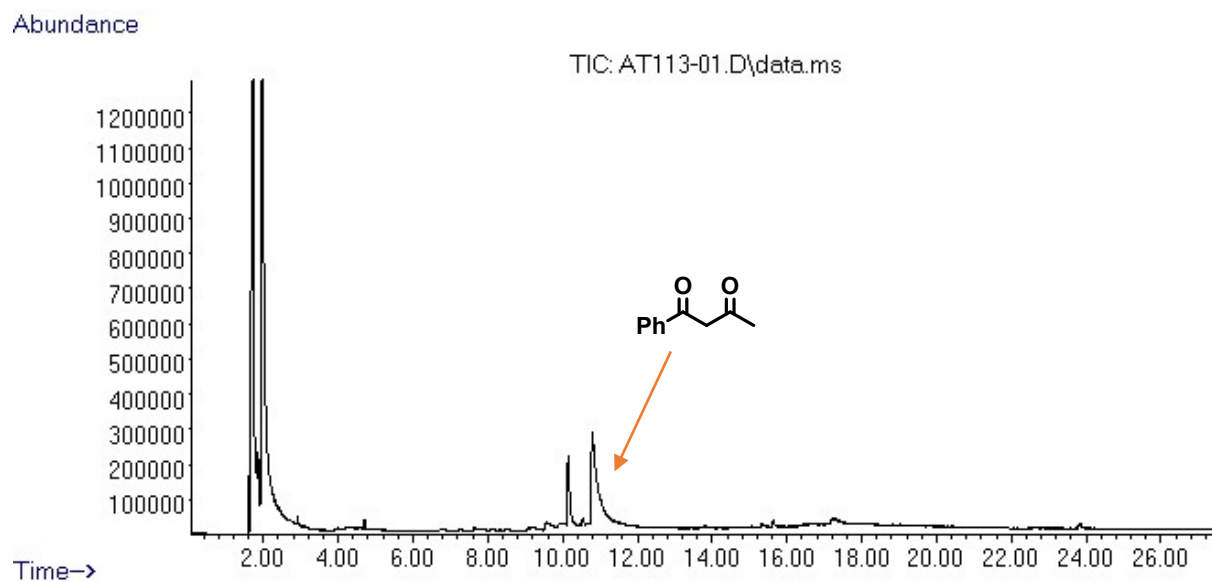

**Figure S66.** GC of the crude mixture of 4-phenyl-3-butyn-2-one (**10**) transfer semihydrogenation with iPrOH catalyzed by **Mn-2** after 24 h at 100 °C

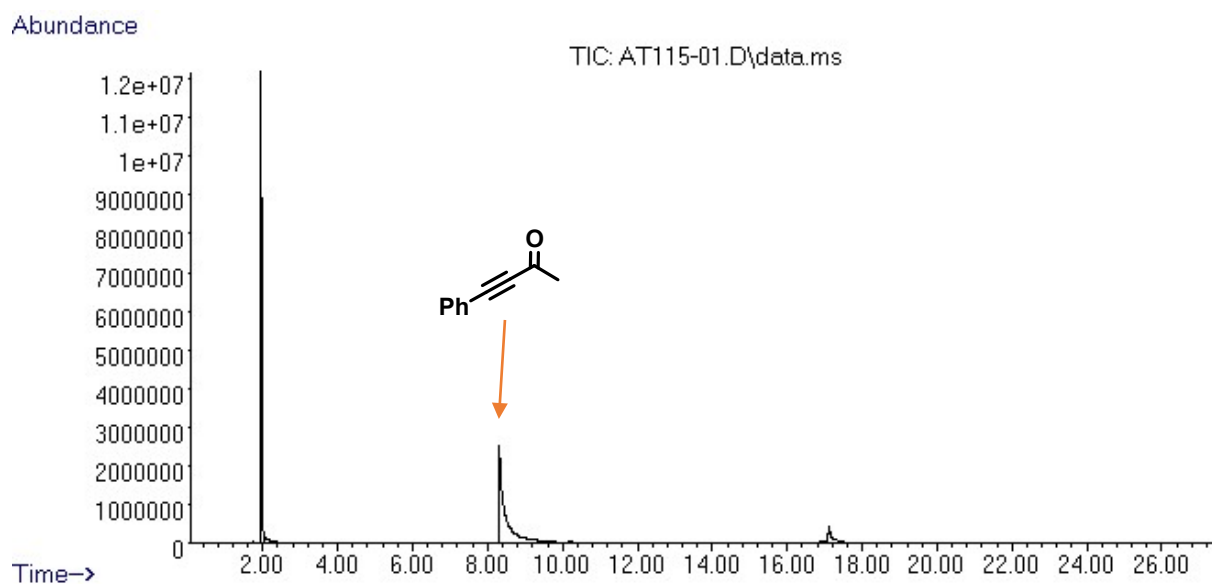

**Figure S67.** GC of the crude mixture of 4-phenyl-3-butyn-2-one (**10**) (0.224 mmol), MeONa (10 mol%), THF (1 mL) and H<sub>2</sub>O (1 mL), at 100 °C for 4 h

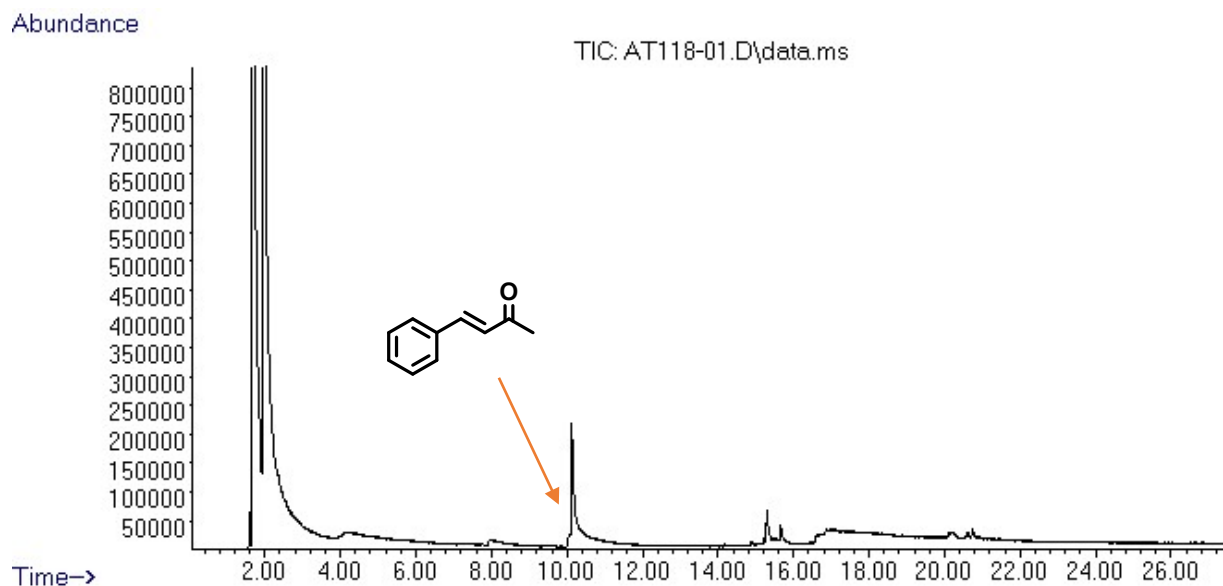

**Figure S68.** GC of the crude mixture of (*E*)-4-phenylbut-3-en-2-one (**10a**) (0.224 mmol), **Mn-2** (4 mol%), MeONa (10 mol%), THF (1 mL) and isopropanol (1 mL), at 100 °C for 4 h

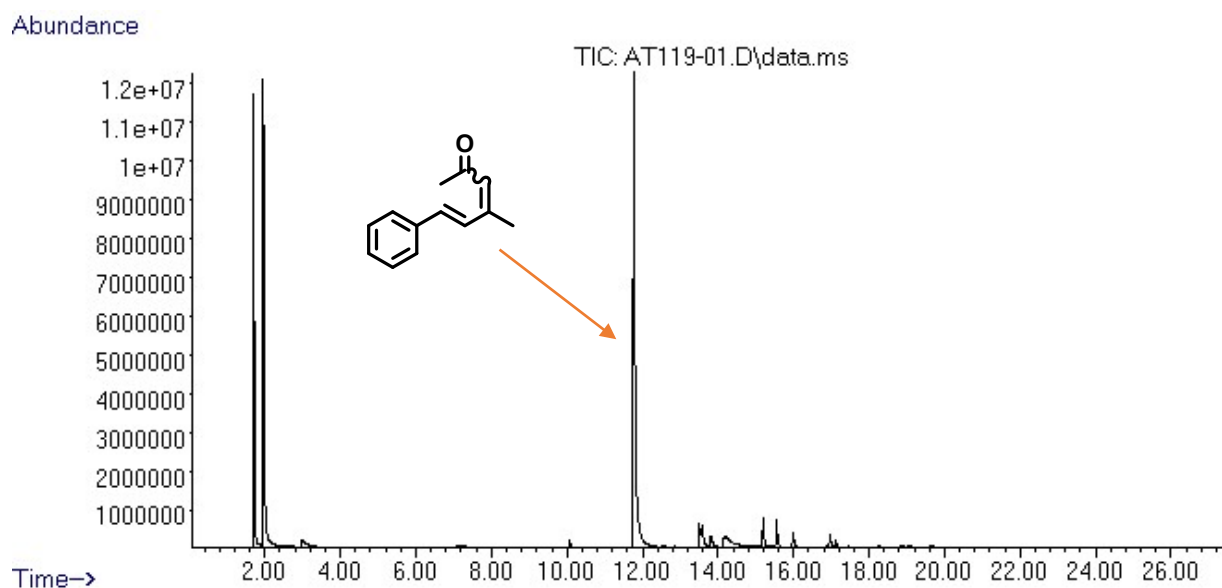

**Figure S69.** GC of the crude mixture of (*E*)-4-phenylbut-3-en-2-one (**10a**) (0.224 mmol), MeONa (10 mol%), THF (1 mL) and acetone (1 mL), at 100 °C for 4 h

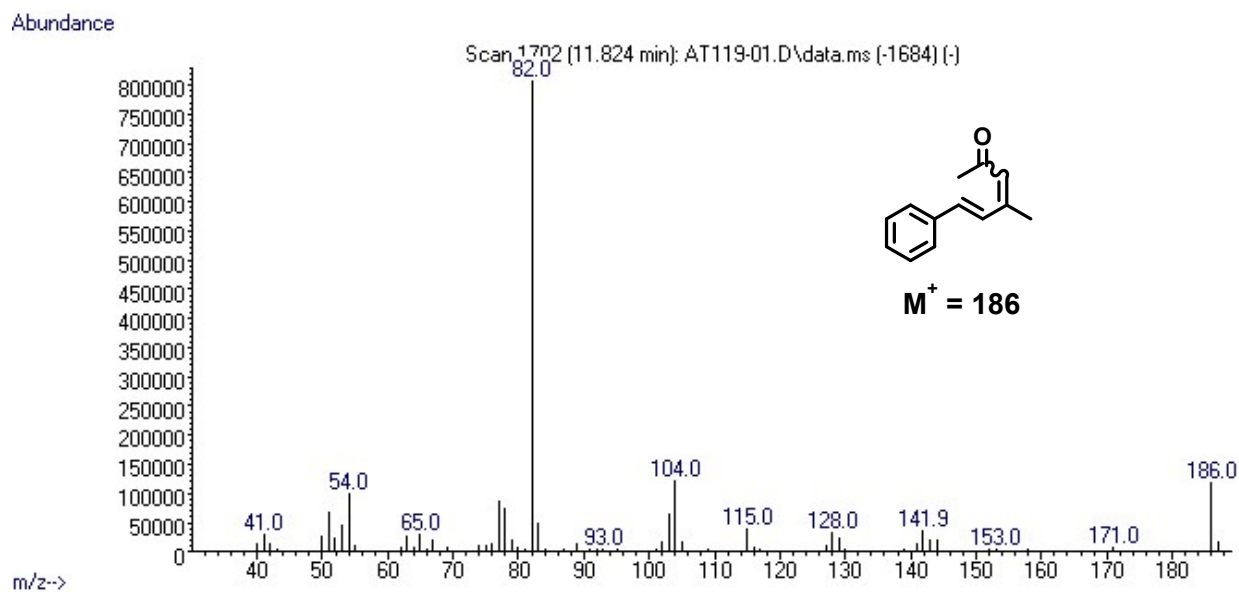

**Figure S70.** MS for (5*E*)-4-methyl-6-phenylhexa-3,5-dien-2-one detected by GC

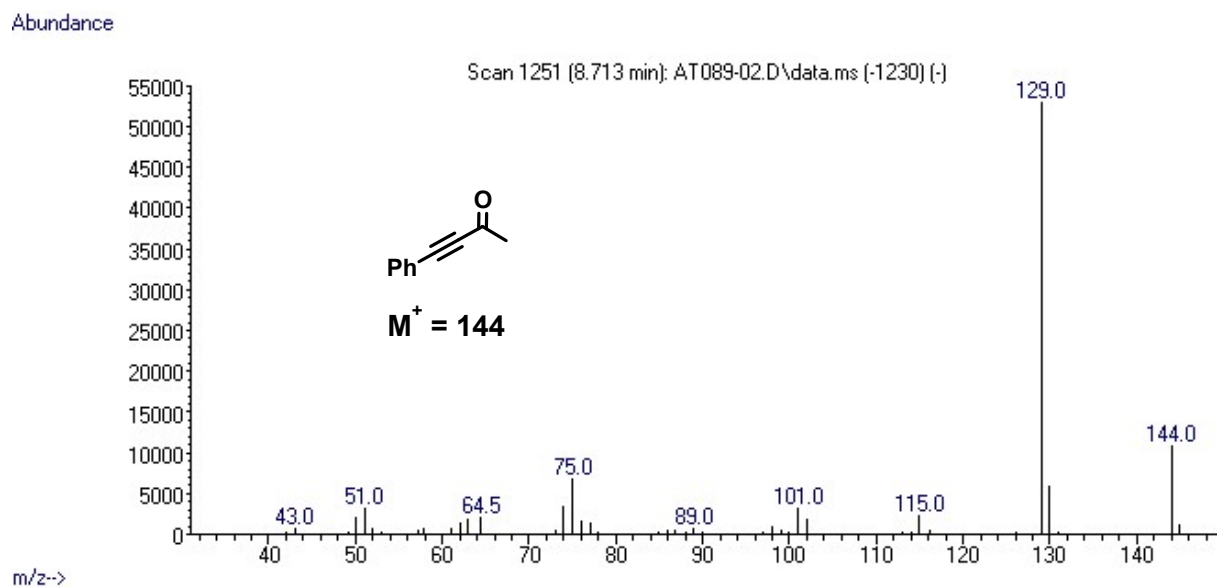

**Figure S71.** MS for 4-phenyl-3-buten-2-one (**10**) detected by GC

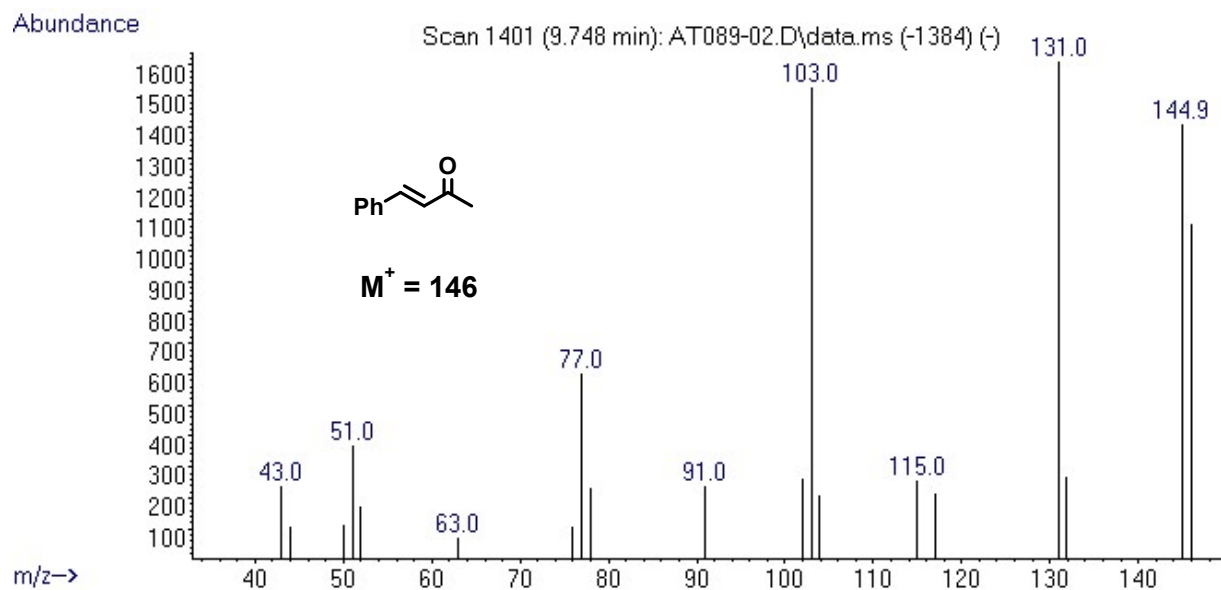

**Figure S72.** MS for (*E*)-4-phenylbut-3-en-2-one (**10a**) detected by GC

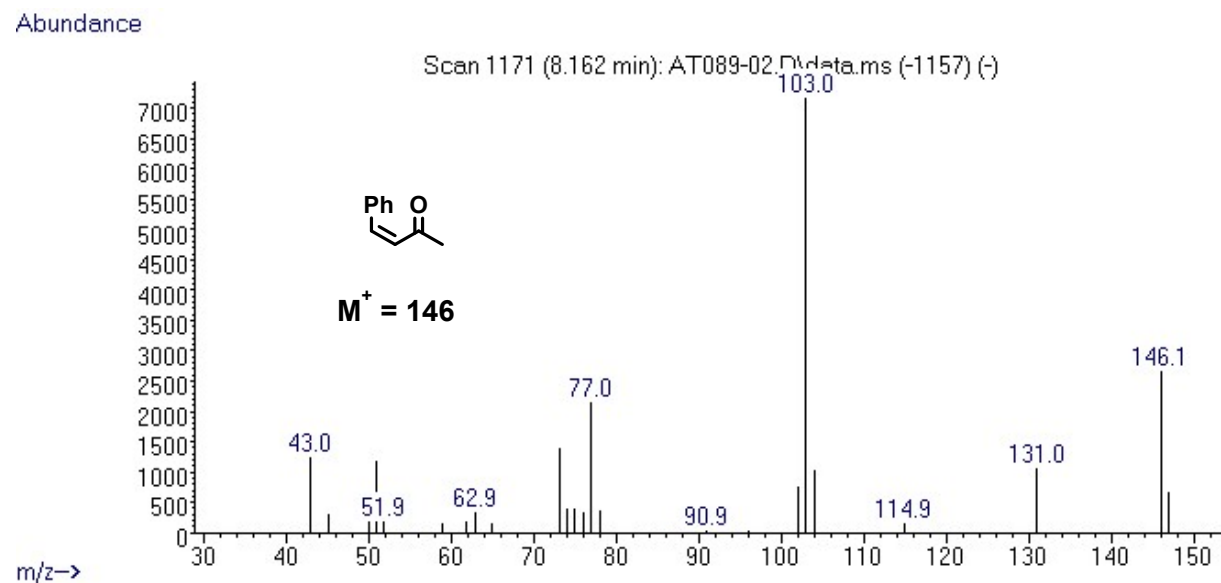

**Figure S73.** MS for (*Z*)-4-phenylbut-3-en-2-one (**10b**) detected by GC

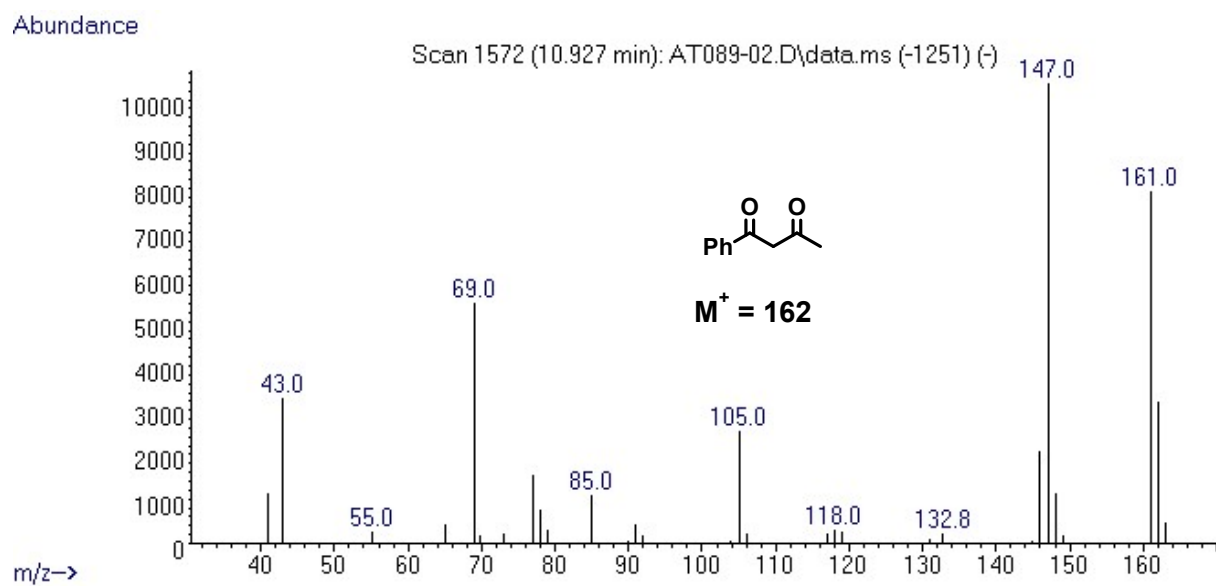

**Figure S74.** MS for 1-phenylbutane-1,3-dione detected by GC

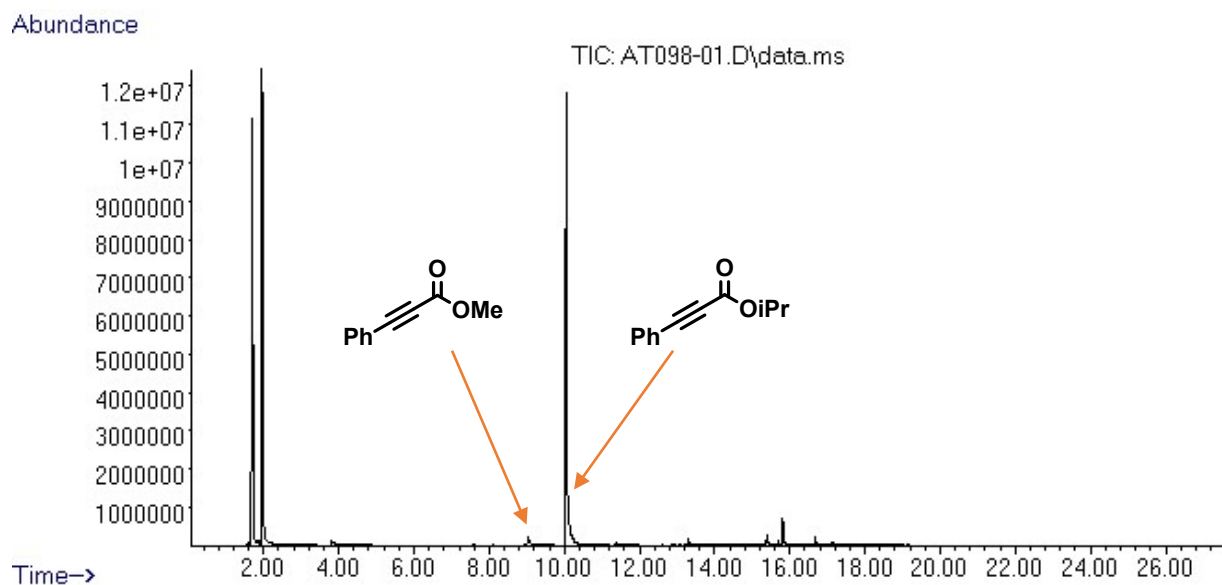

**Figure S75.** GC of the crude mixture of methyl phenylpropiolate (**11**) transfer  
semihydrogenation with iPrOH catalyzed by **Mn-2**

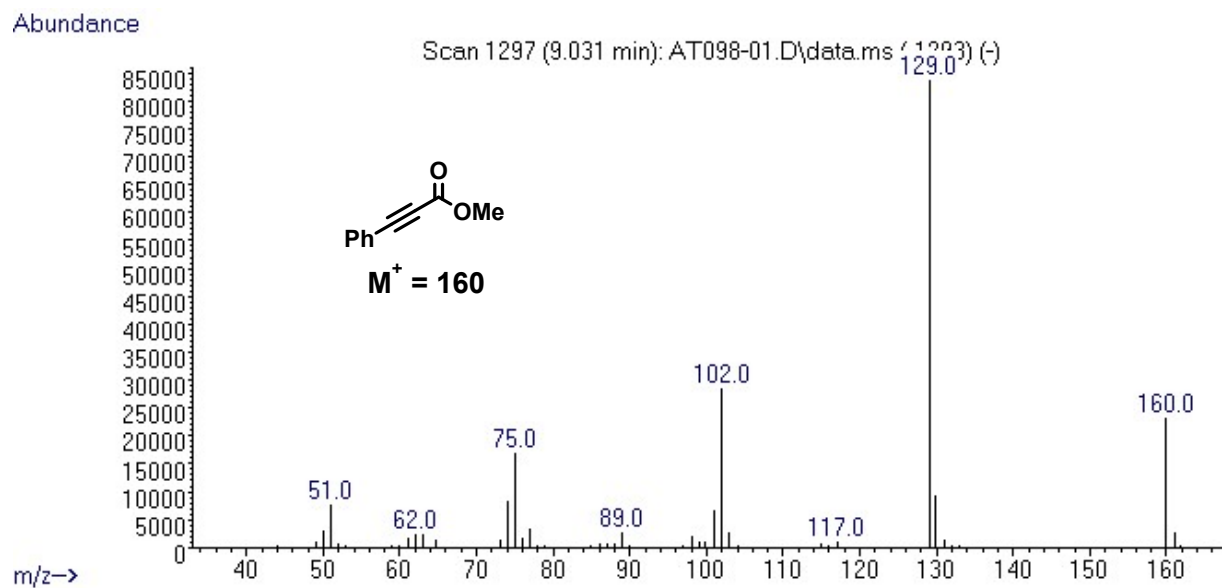

Figure S76. MS for methyl phenylpropiolate (**11**) detected by GC

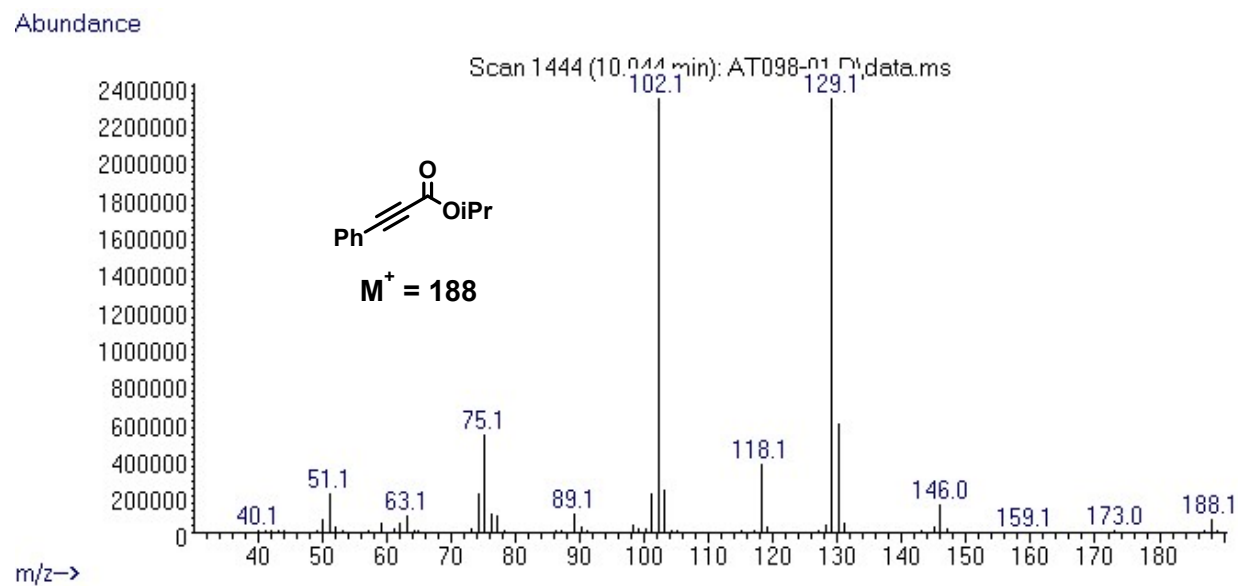

Figure S77. MS for isopropyl phenylpropiolate detected by GC

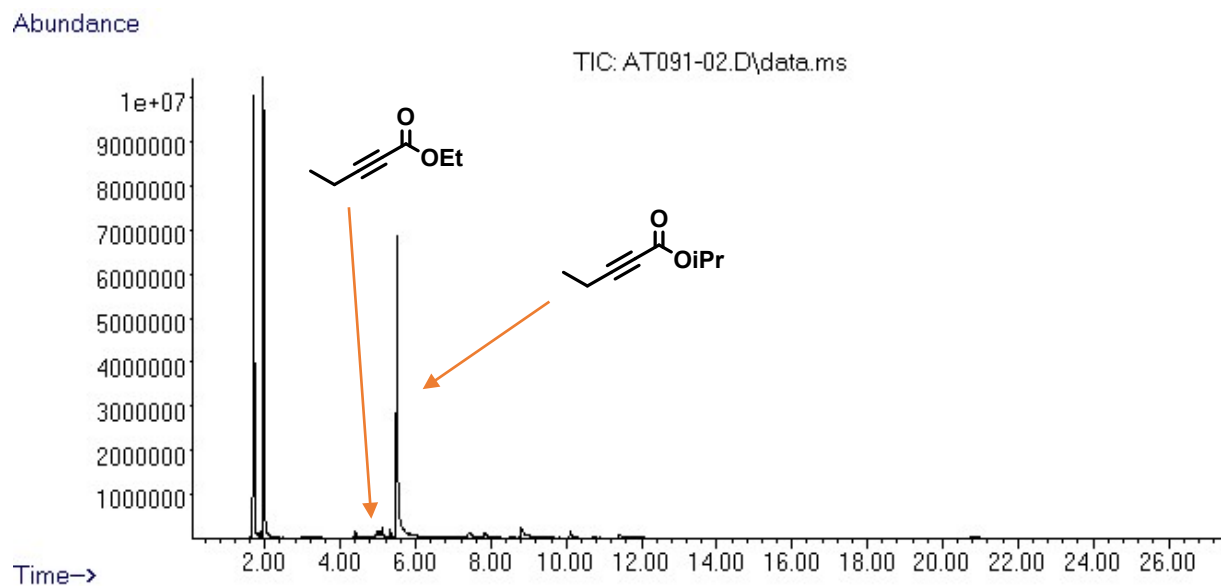

**Figure S78.** GC of the crude mixture of ethyl 2-pentynoate (**12**) transfer semihydrogenation with iPrOH catalyzed by **Mn-2**

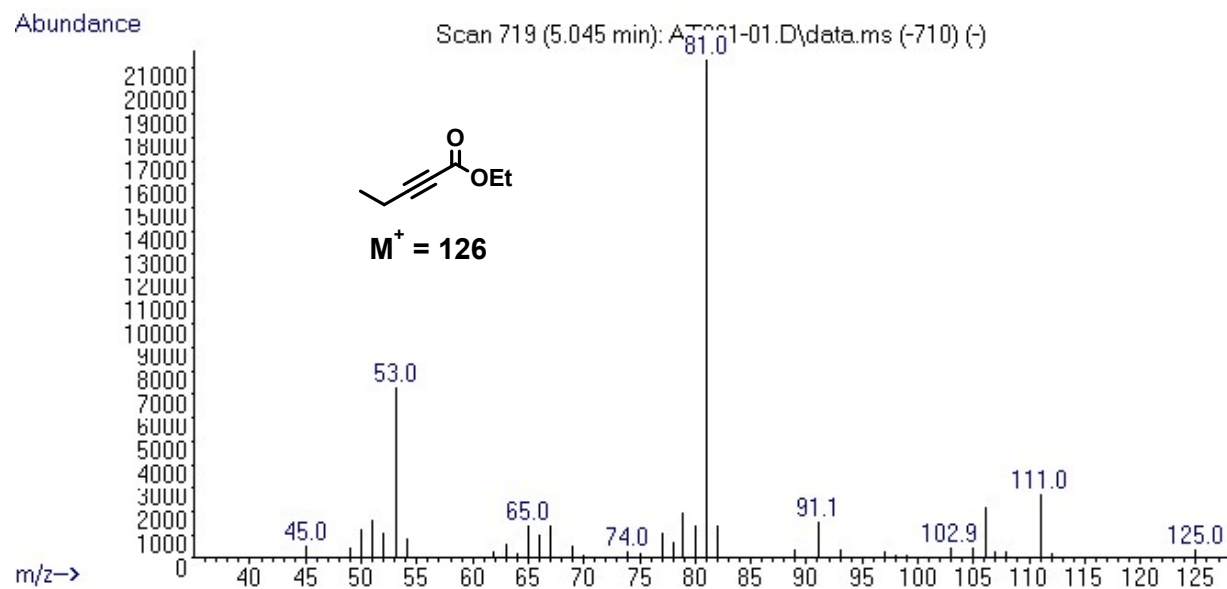

**Figure S79.** MS for ethyl 2-pentynoate (**12**) detected by GC

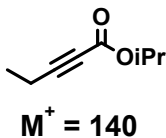

**Figure S80.** MS for isopropyl 2-pentynoate detected by GC

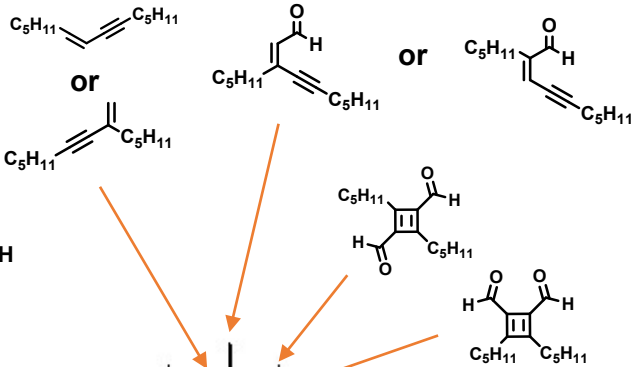

**Figure S81.** GC of the crude mixture of 2-octynal (**13**) transfer semihydrogenation with iPrOH catalyzed by **Mn-2**

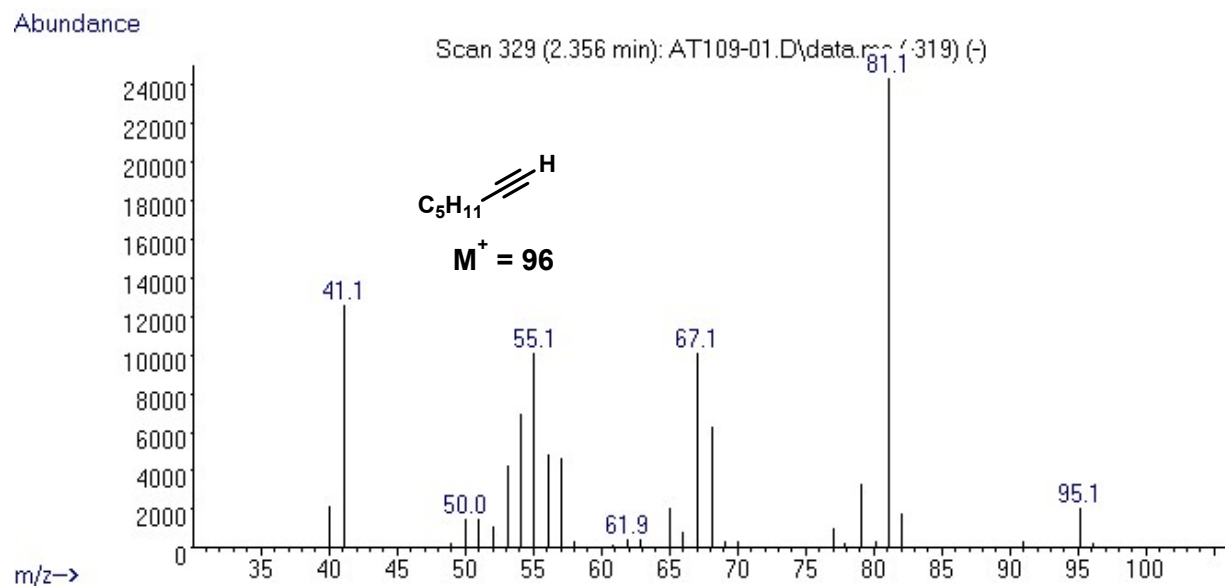

**Figure S82.** MS for 1-heptyne detected by GC

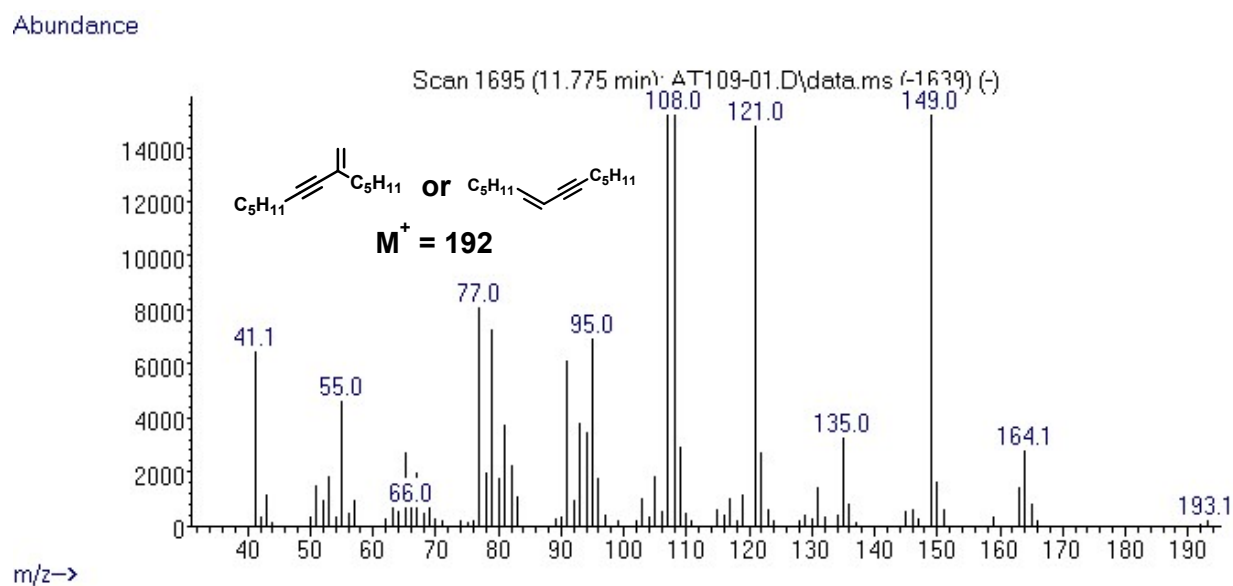

**Figure S83.** MS for dimerization product of 1-heptyne detected by GC

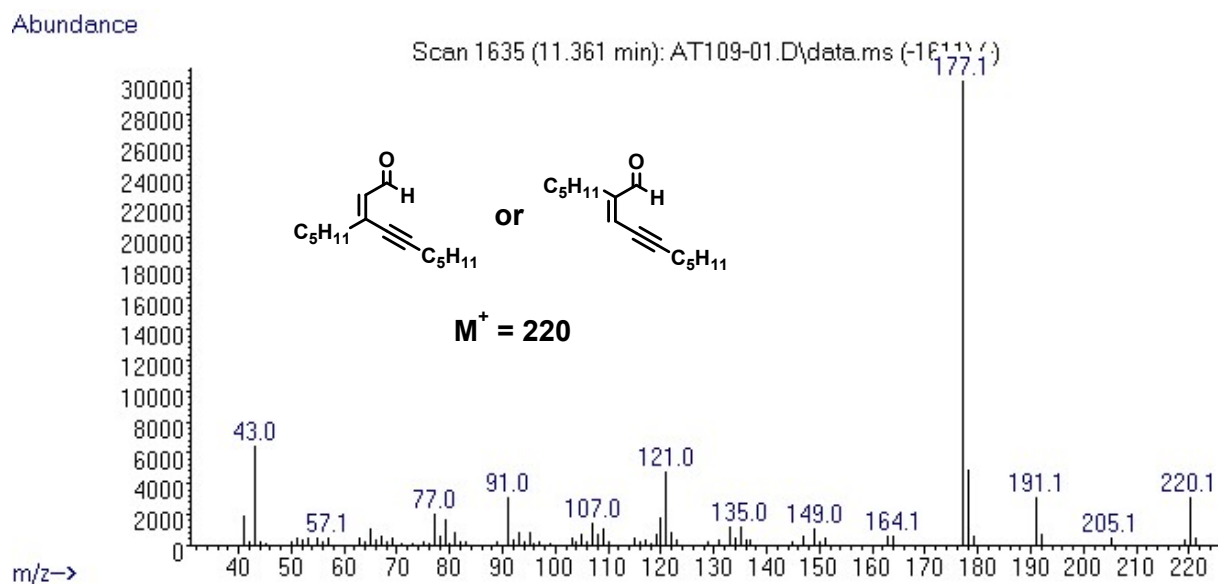

**Figure S84.** MS for coupling product between 1-heptyne and 2-octynal detected by GC

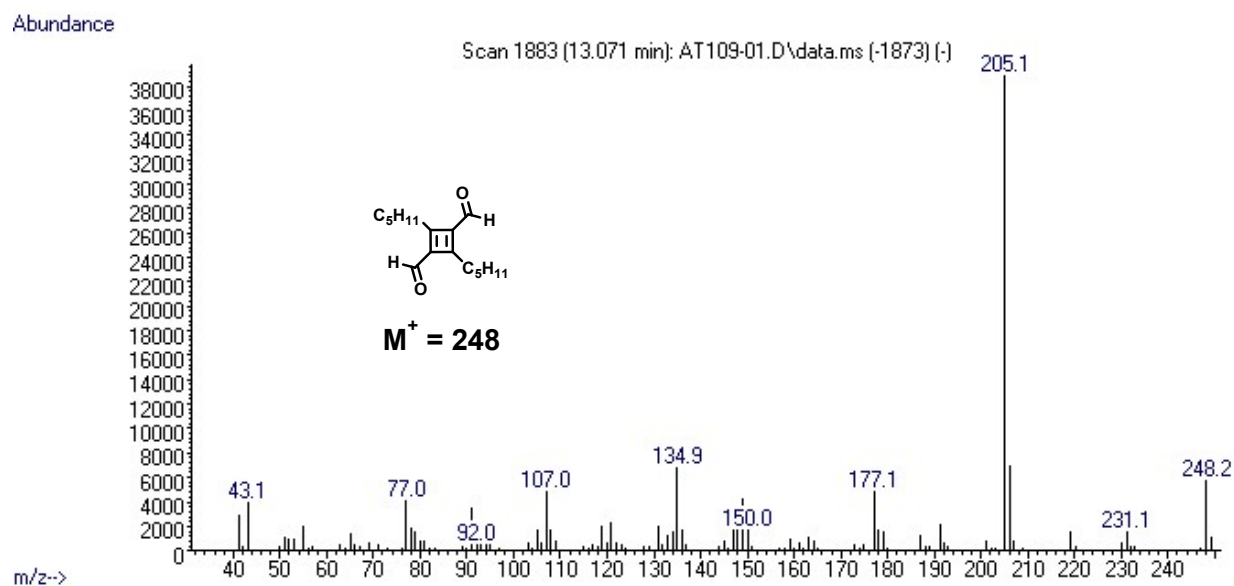

**Figure S85.** MS for dimerization product of 2-octynal detected by GC

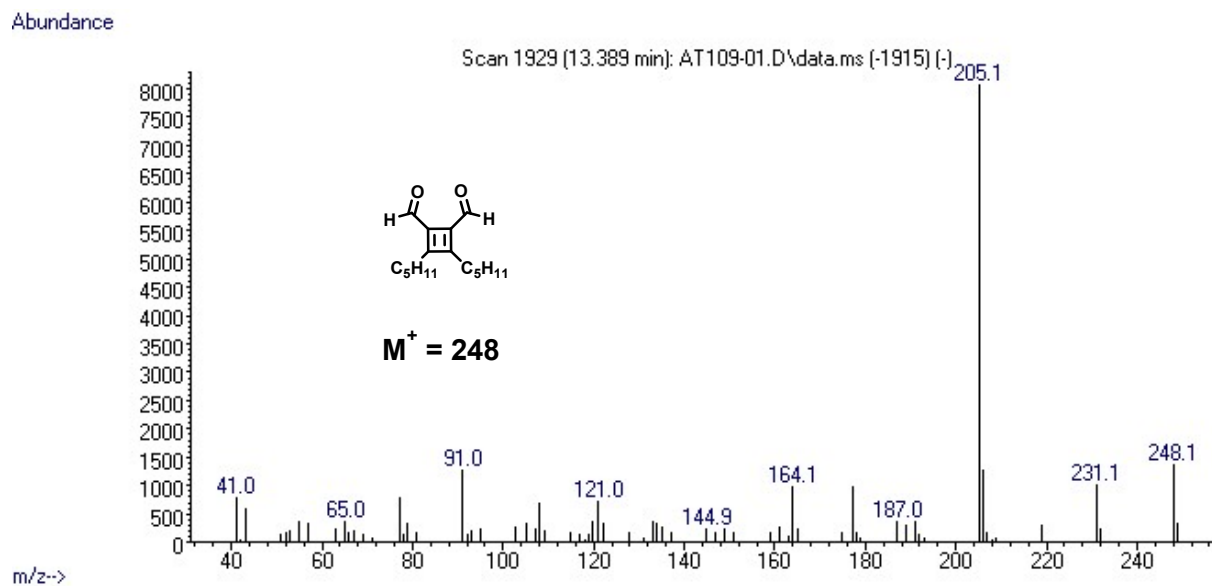

**Figure S86.** MS for dimerization product of 2-octynal detected by GC

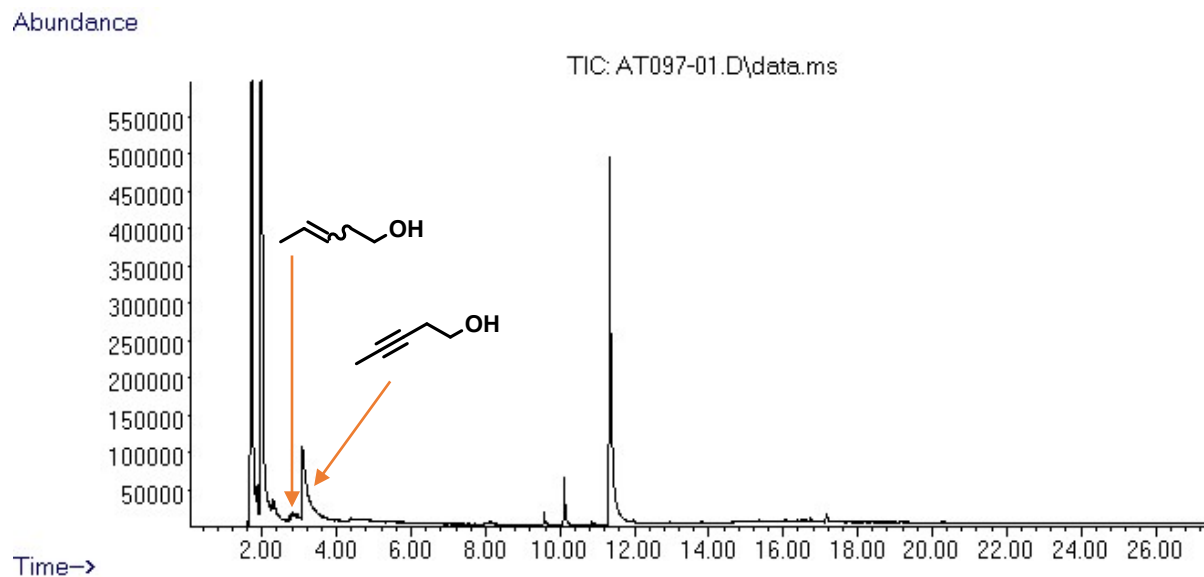

**Figure S87.** GC of the crude mixture of 3-pentyn-1-ol (**14**) transfer semihydrogenation with iPrOH catalyzed by **Mn-2**

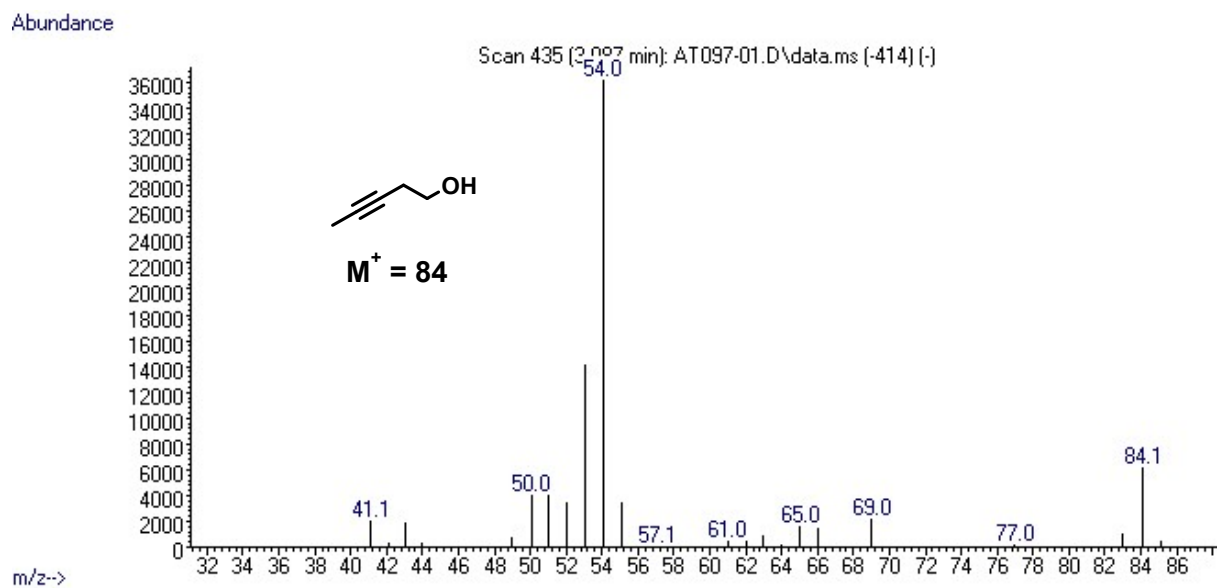

**Figure S88.** MS for 3-pentyn-1-ol (**14**) detected by GC

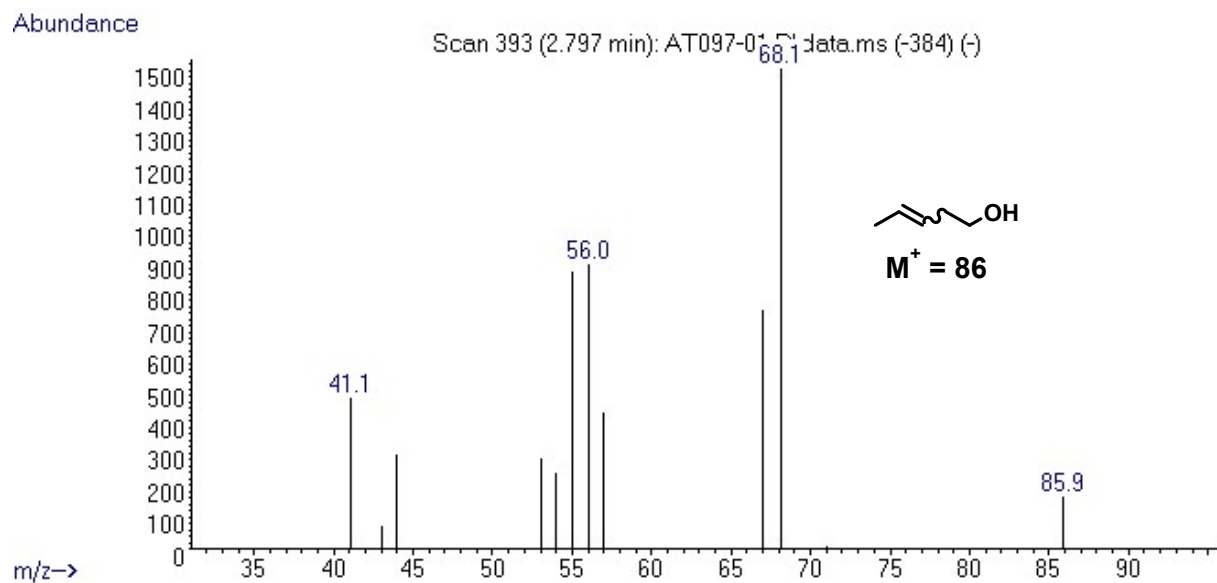

**Figure S89.** MS for pent-3-en-1-ol (**14a**) detected by GC

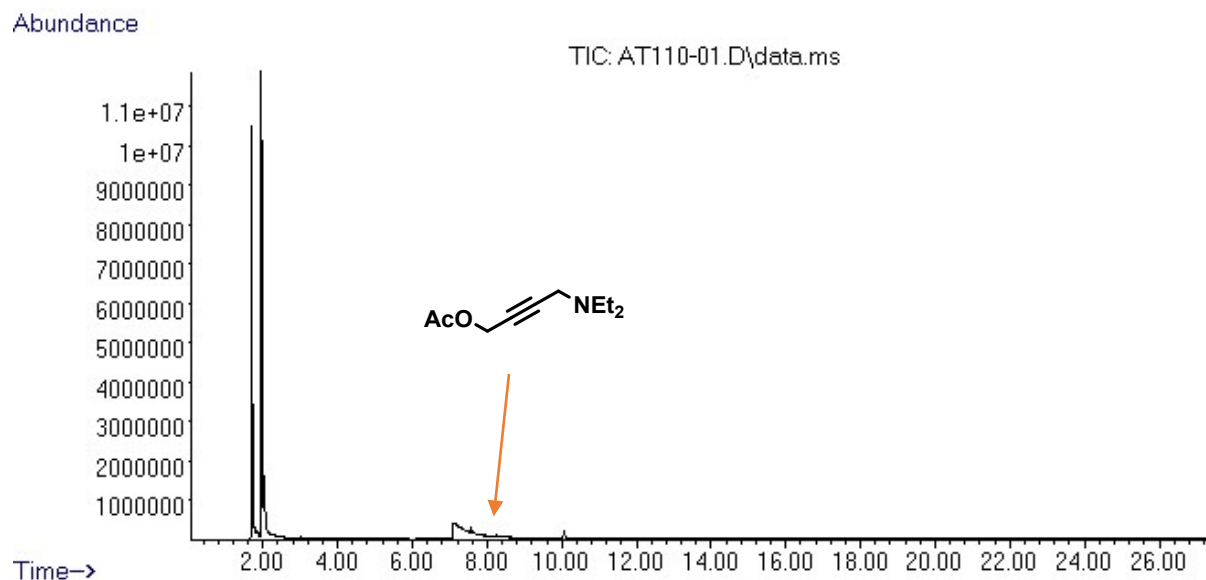

**Figure S90.** GC of the crude mixture of 1-acetoxy-4-diethylamino-2-butyne (**15**) transfer semihydrogenation with iPrOH catalyzed by **Mn-2**

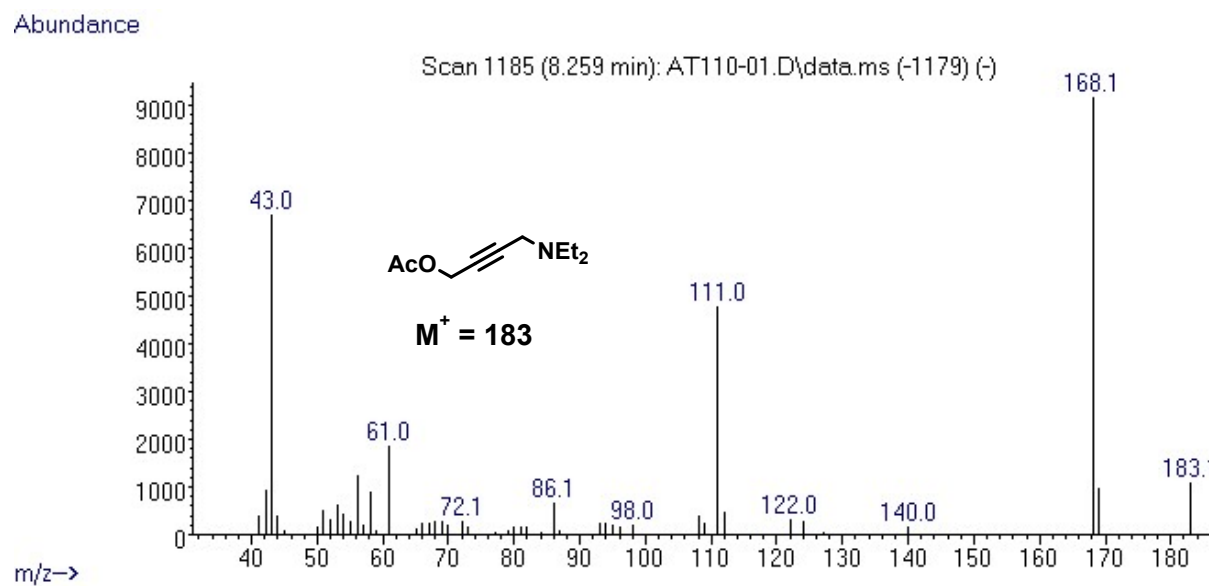

**Figure S91.** MS for 1-acetoxy-4-diethylamino-2-butyne (**15**) detected by GC

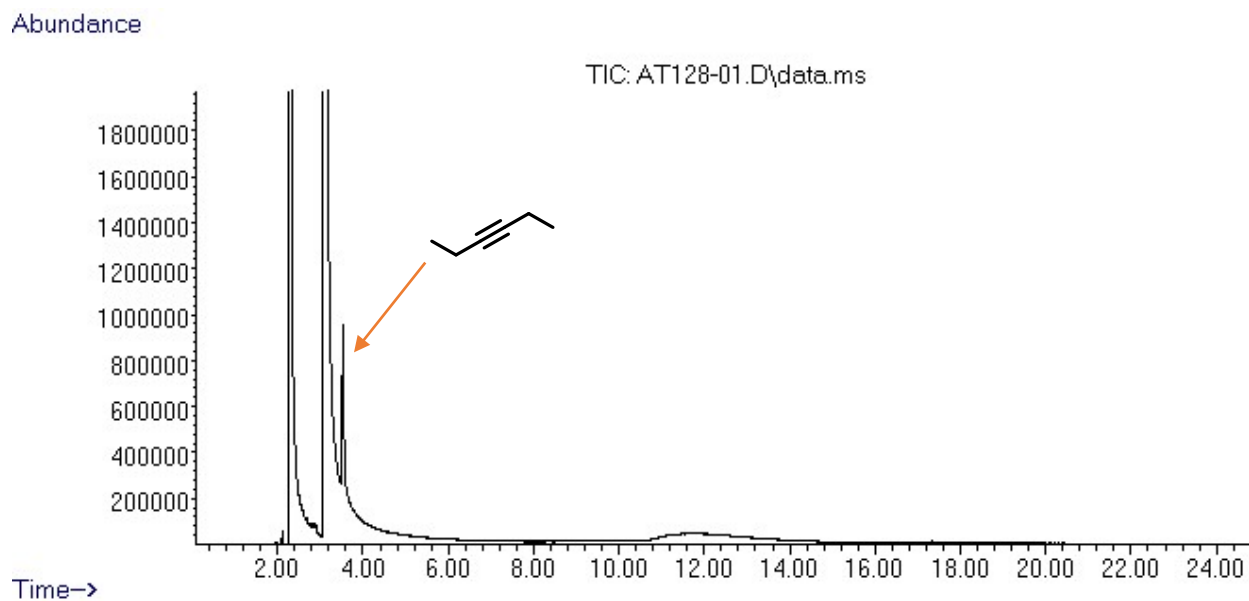

**Figure S92.** GC of the crude mixture of 3-hexyne (**16**) transfer semihydrogenation with iPrOH catalyzed by **Mn-2**

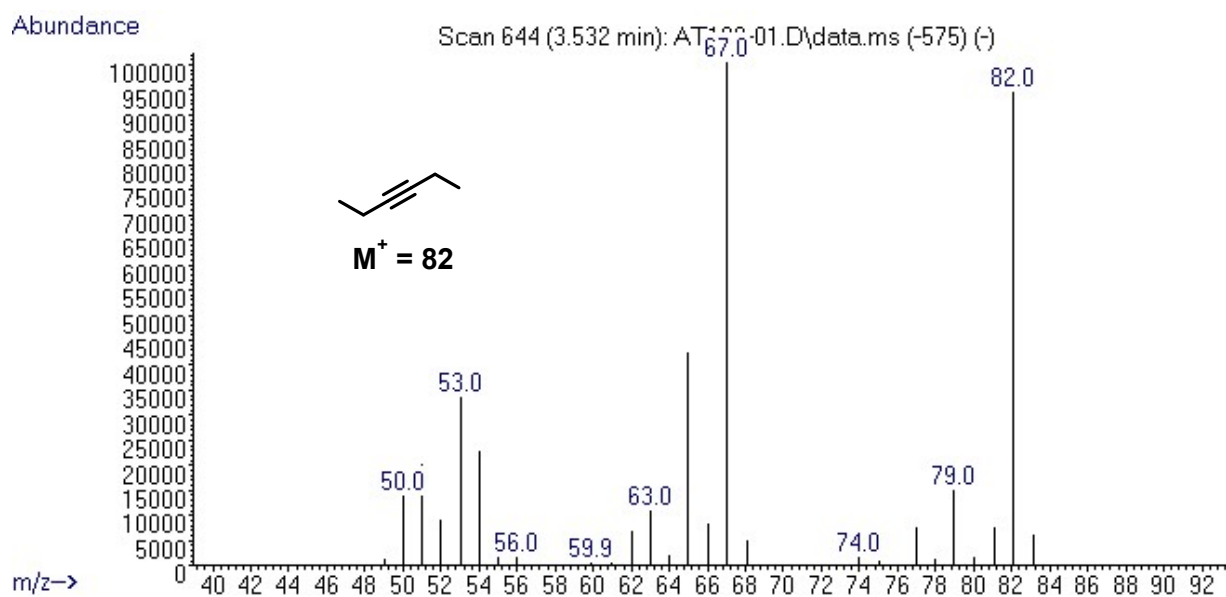

**Figure S93.** MS for 3-hexyne (**16**) detected by GC

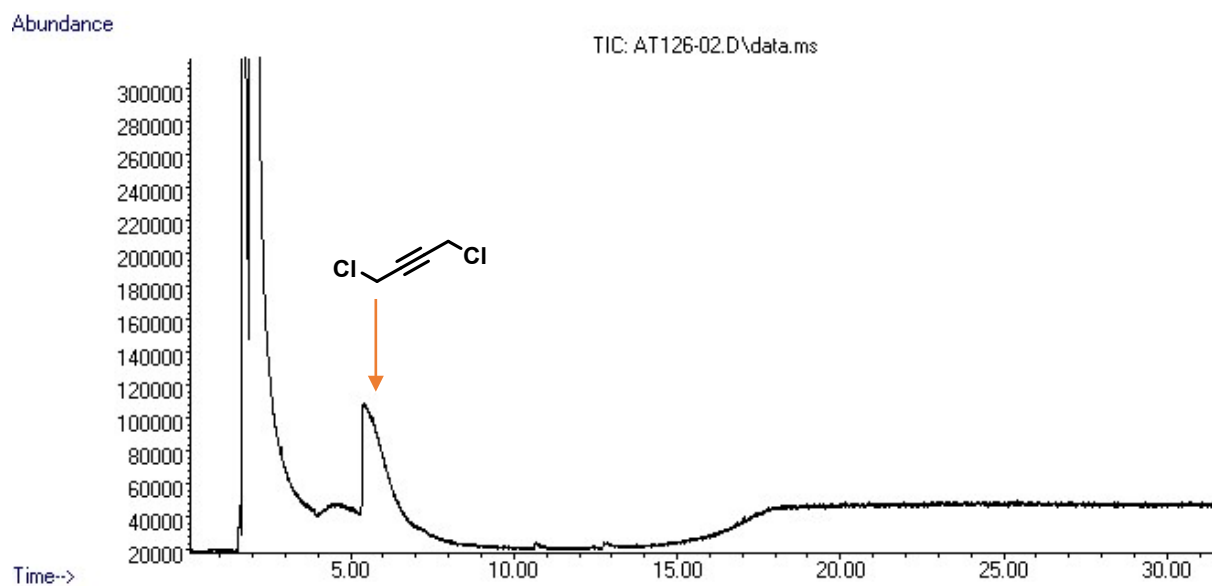

**Figure S94.** GC of the crude mixture of 1,4-dichloro-2-butyne (**17**) transfer semihydrogenation with iPrOH catalyzed by **Mn-2**

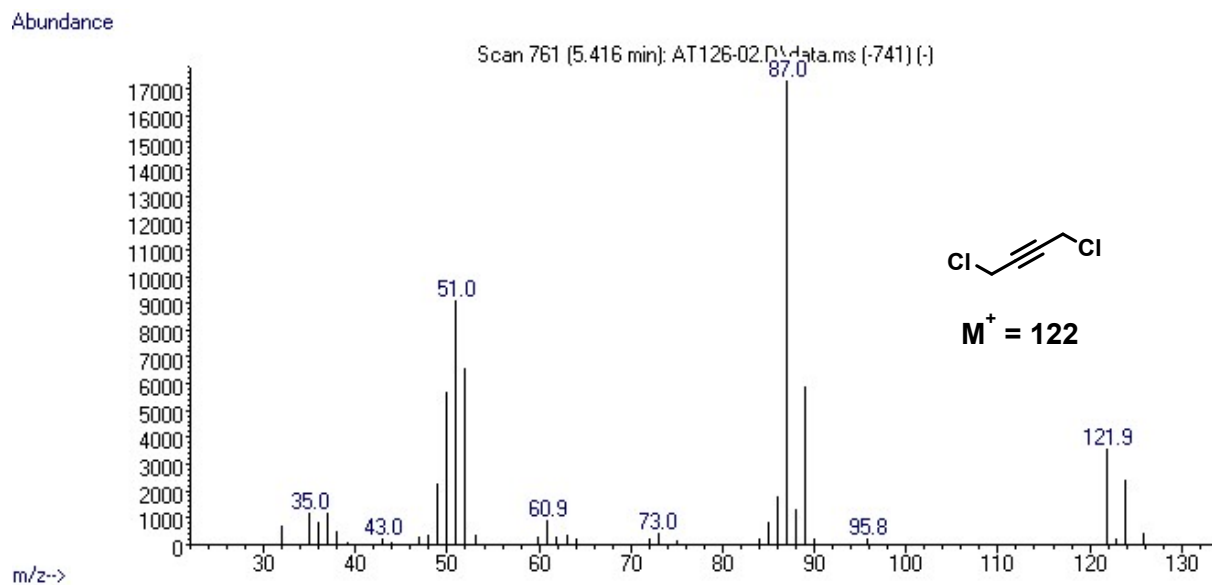

**Figure S95.** MS for 1,4-dichloro-2-butyne (**17**) detected by GC

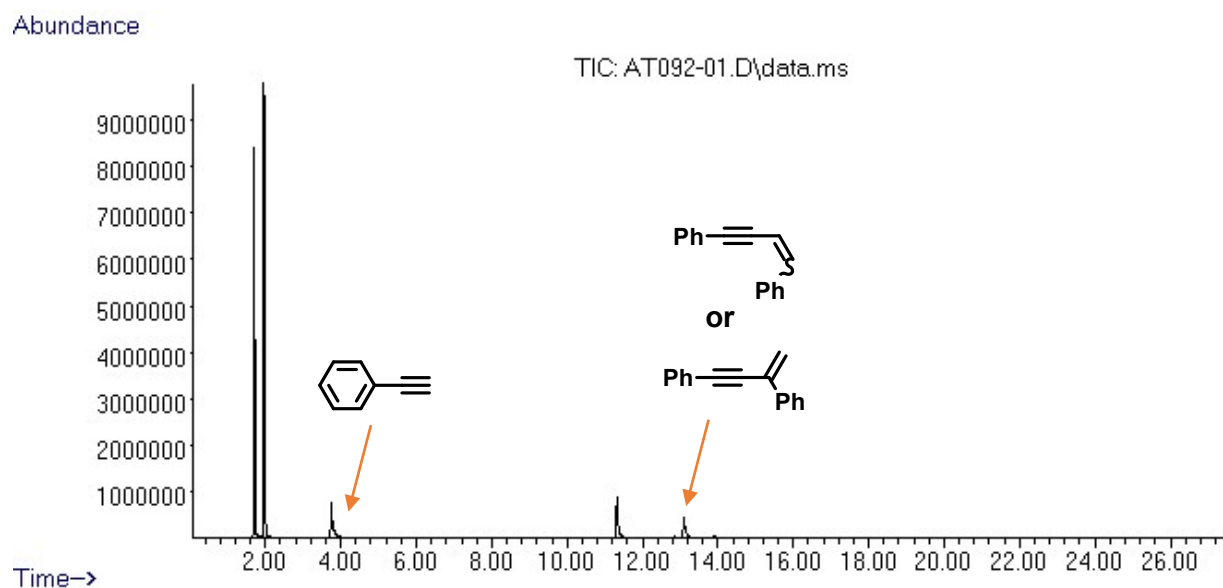

**Figure S96.** GC of the crude mixture of phenylacetylene (**18**) transfer semihydrogenation with iPrOH catalyzed by **Mn-2**

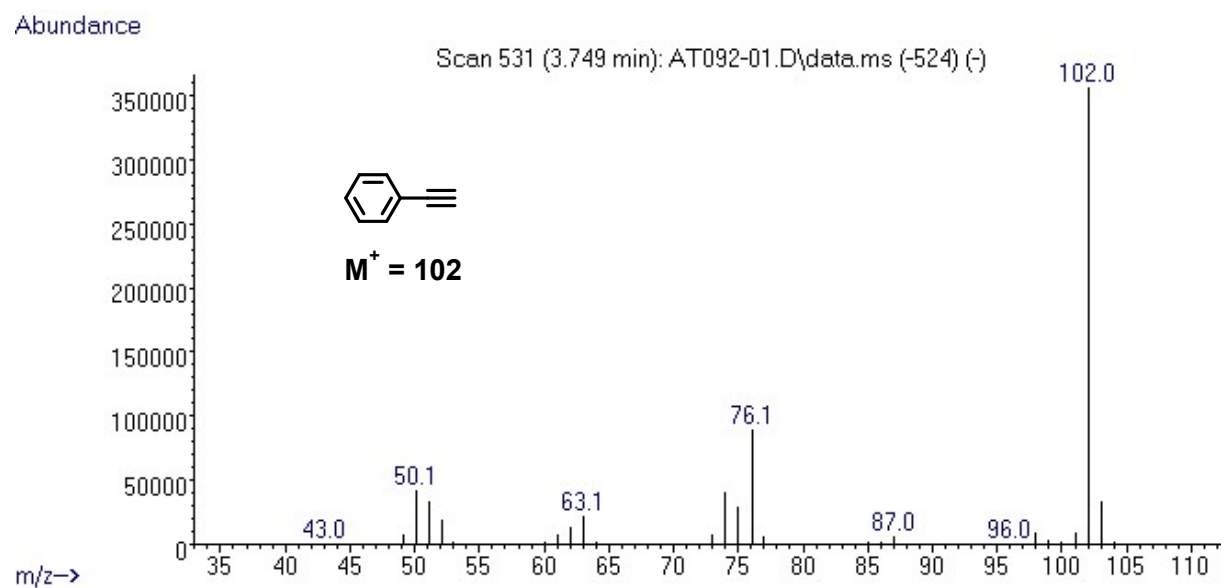

**Figure S97.** MS for phenylacetylene (**18**) detected by GC

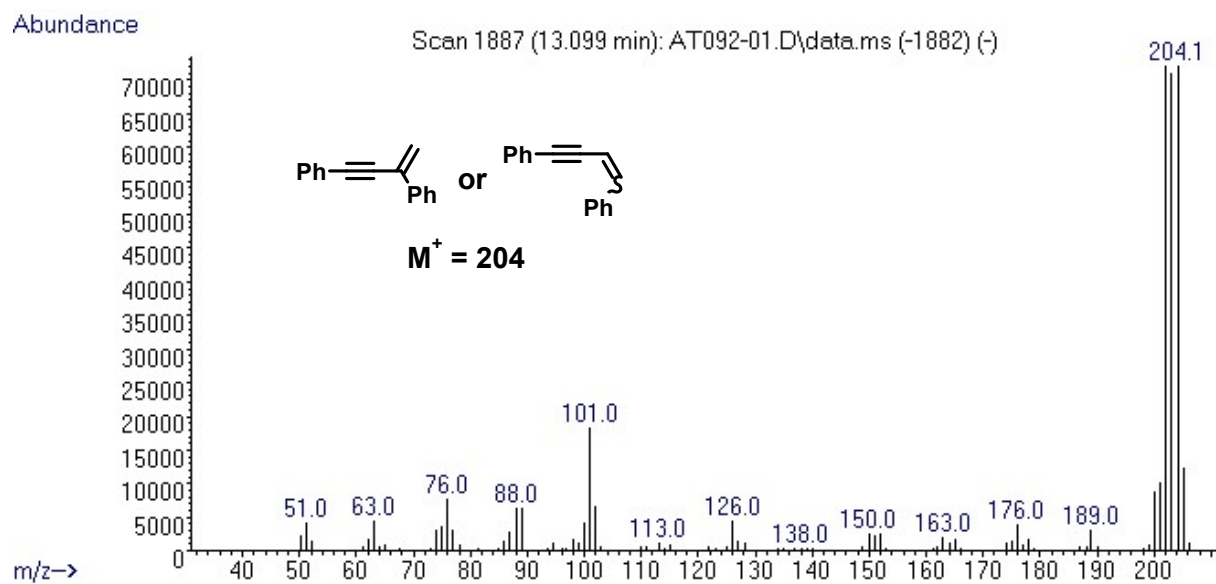

**Figure S98.** MS for dimerization product of phenylacetylene detected by GC

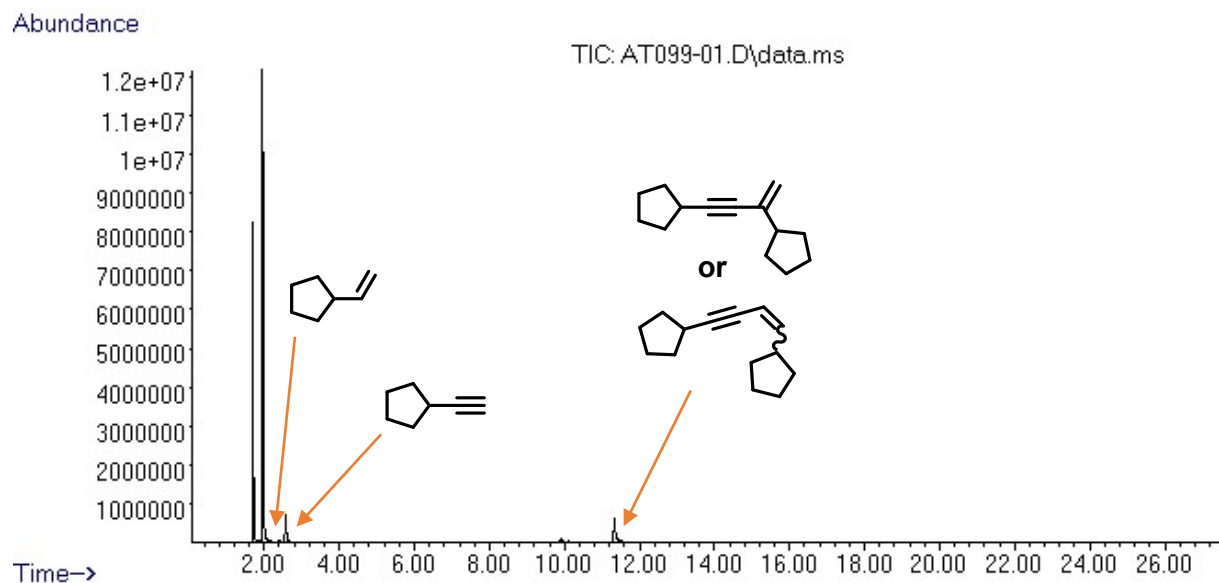

**Figure S99.** GC of the crude mixture of cyclopentylacetylene (**19**) transfer semihydrogenation with iPrOH catalyzed by **Mn-2**

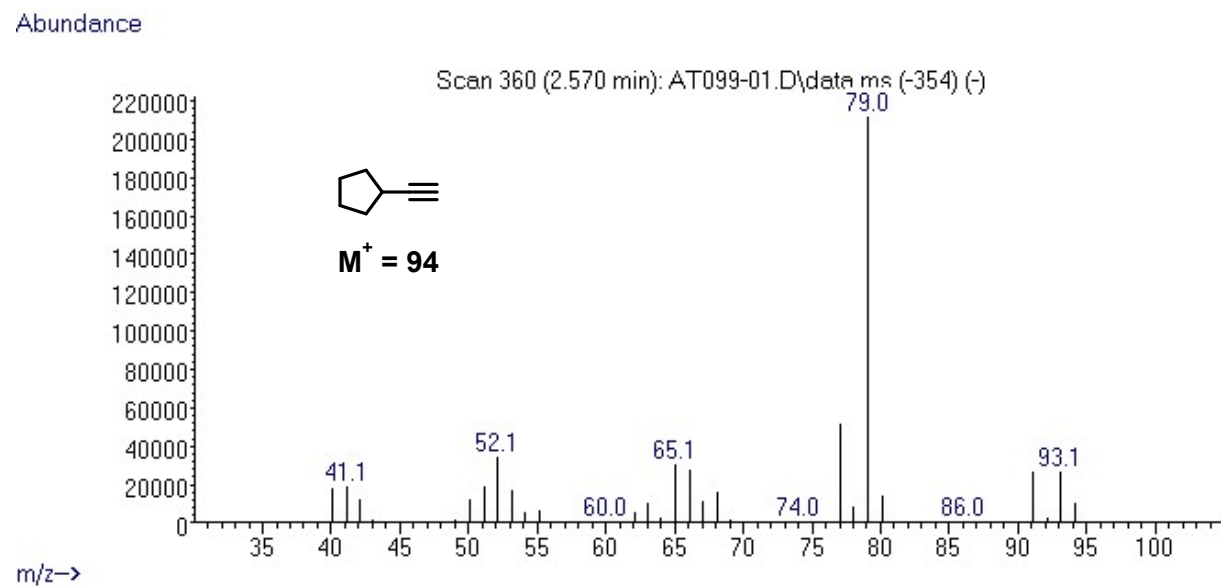

**Figure S100.** MS for cyclopentylacetylene (**19**) detected by GC

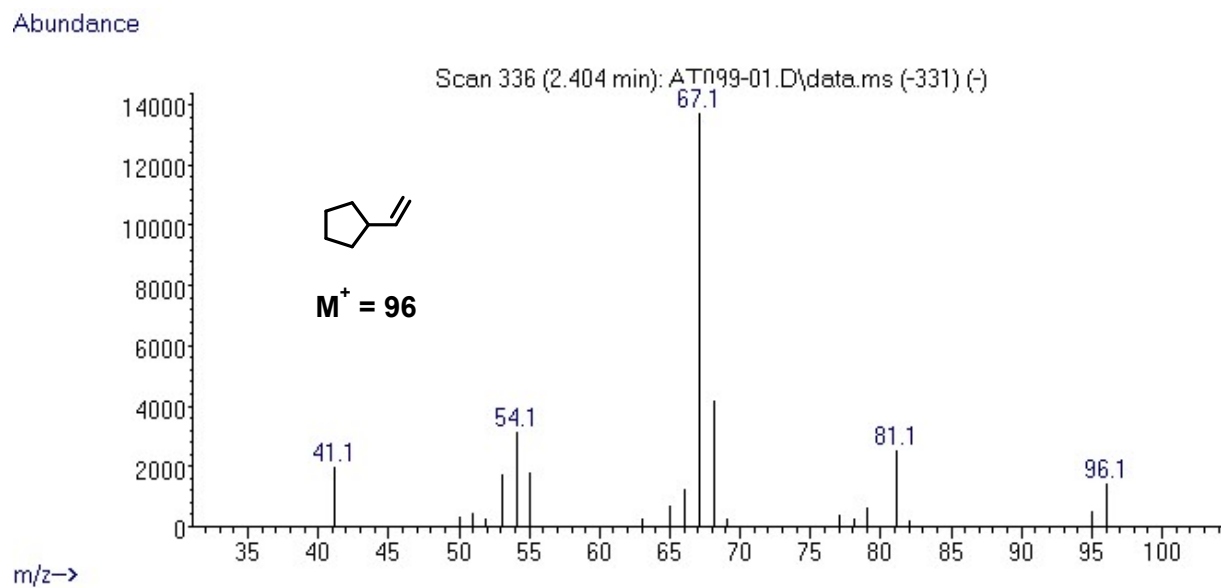

**Figure S101.** MS for vinylcyclopentane (**19a**) detected by GC

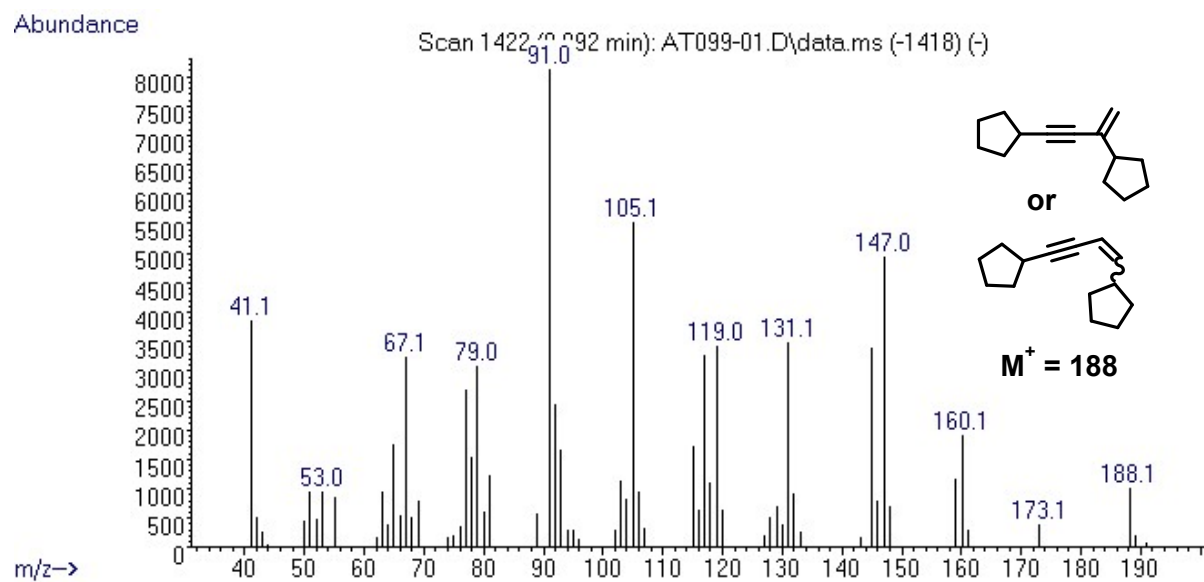

**Figure S102.** MS for dimerization product of cyclopentylacetylene detected by GC

#### IV. Mechanistic Insights

##### *Experiments for kinetic profile*

Independent experiments were carried out as described for the optimized reaction, but at different reaction times. Yields were determined by GC-MS.

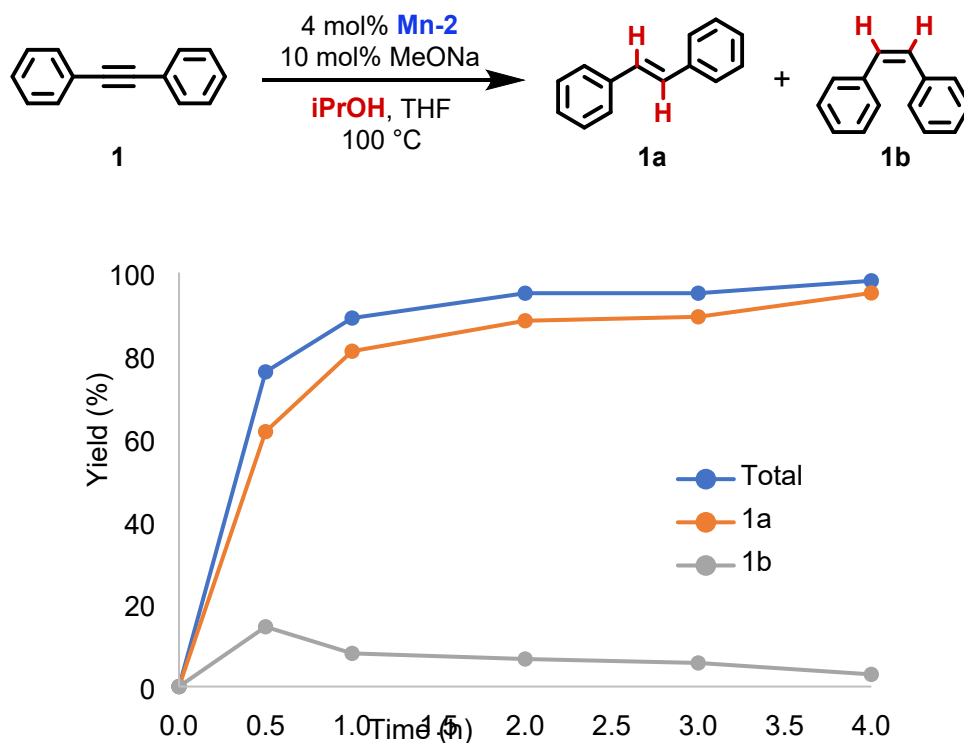

**Figure S103.** Kinetic profile of the semihydrogenation of **1** with iPrOH as transfer agent and **Mn-2** as pre-catalyst. Yields determined by GC-MS

##### *Additional experiments for isomerization and internal sphere mechanism*

Independent experiments were carried out as described for the optimized reaction, but with *cis*- or *trans*-stilbene as substrate, or in the presence of 1.1 eq of triphenyl phosphine. Yields were determined by GC-MS. The MS of the other molecules detected are presented in the optimization (page S13).

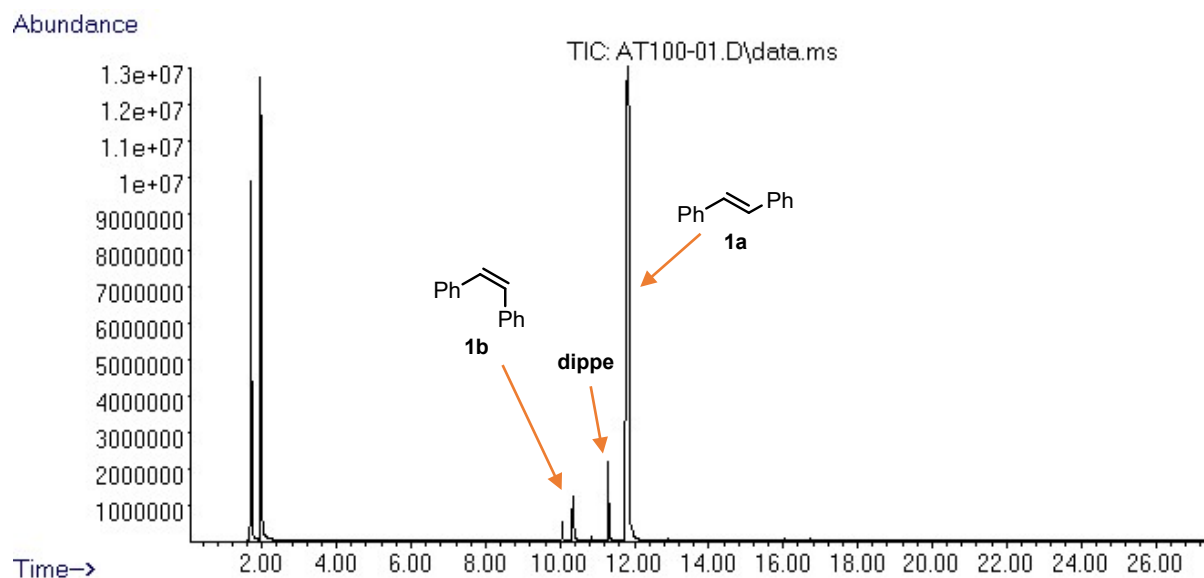

**Figure S104.** GC of the crude mixture of the test with *cis*-stilbene (**1b**) for the isomerization catalyzed by **Mn-2** in the presence of iPrOH

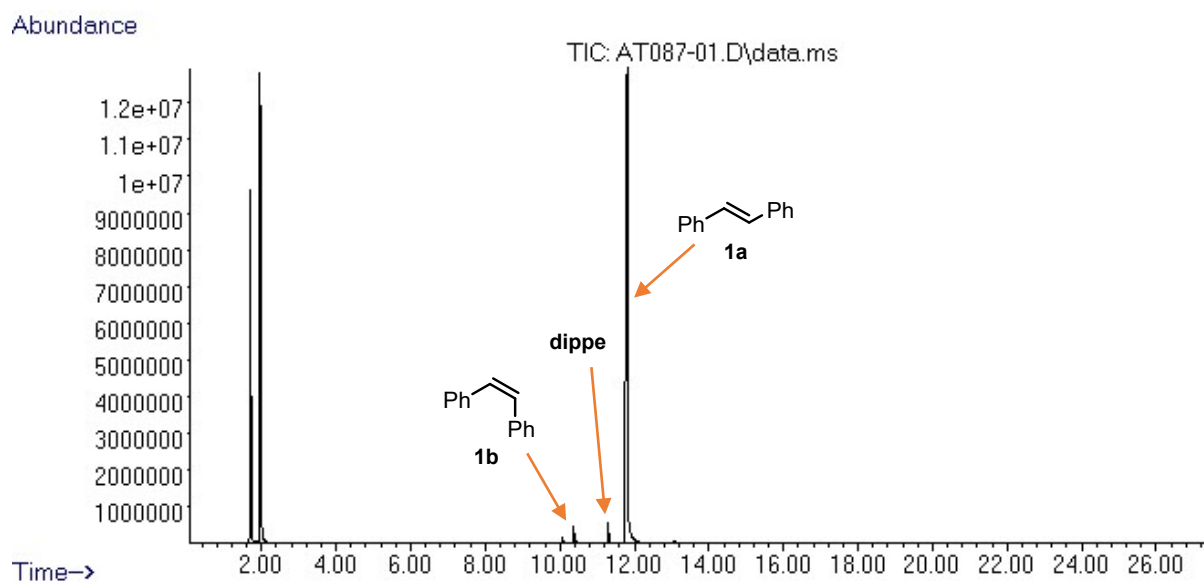

**Figure S105.** GC of the crude mixture of the test with *trans*-stilbene (**1a**) for the isomerization catalyzed by **Mn-2** in the presence of iPrOH

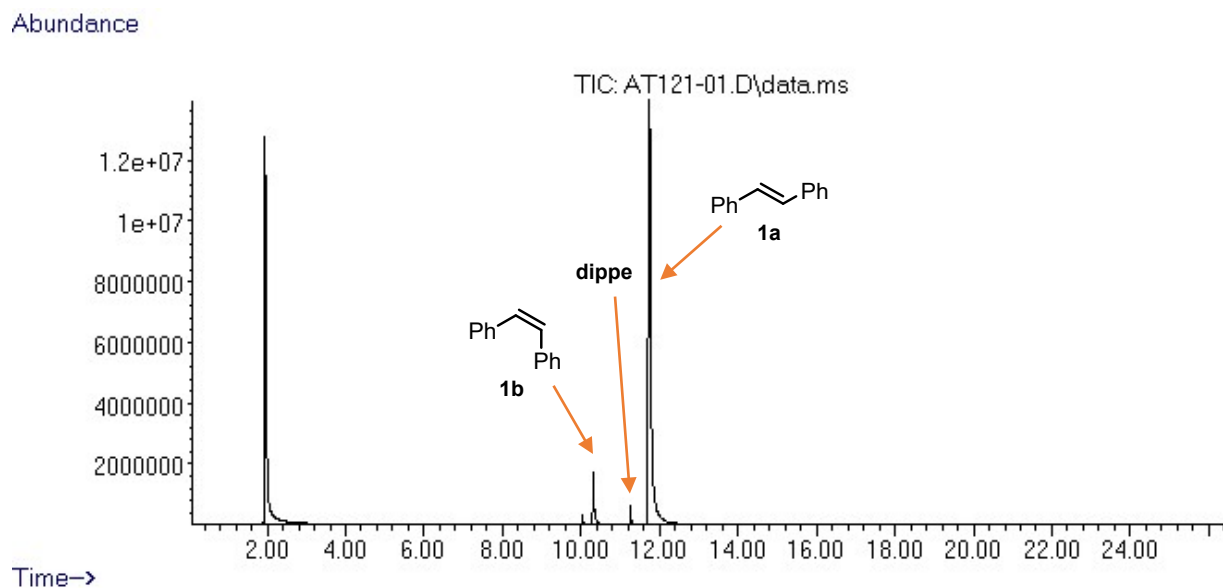

**Figure S106.** GC of the crude mixture of the test with *cis*-stilbene (**1a**) for the isomerization catalyzed by **Mn-2** in the absence of iPrOH

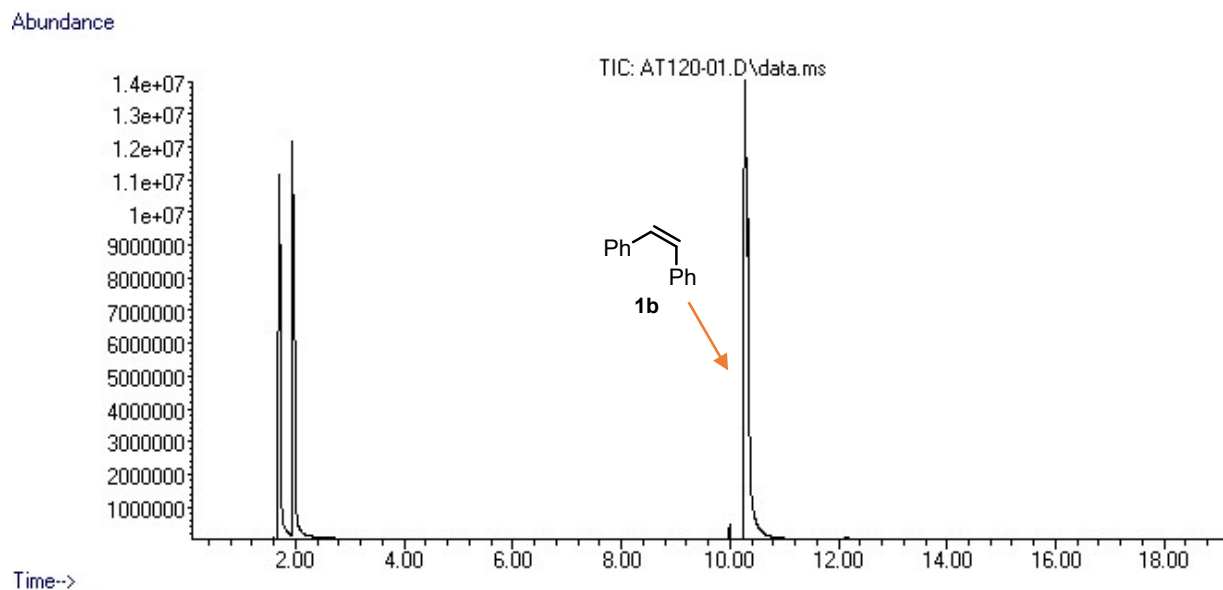

**Figure S107.** GC of the crude mixture of the test with *cis*-stilbene (**1a**) for the isomerization in the presence of iPrOH but in the absence of any Mn-based catalytic precursor

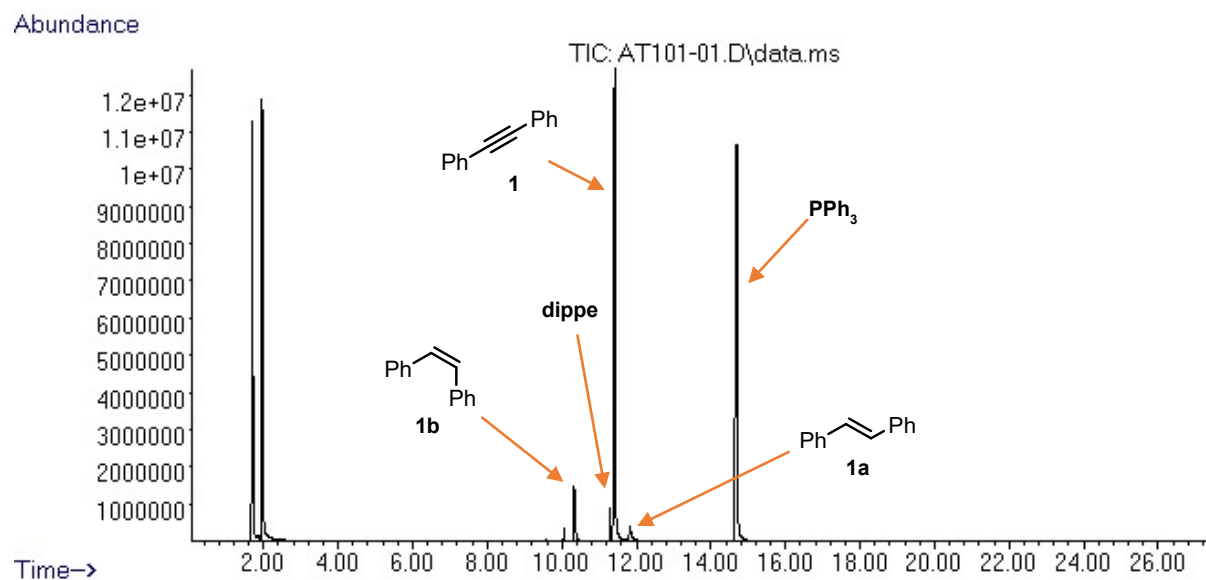

**Figure S108.** GC of the crude mixture of the diphenylacetylene (**1**) transfer semihydrogenation with iPrOH catalyzed by **Mn-2** in the presence of 1.1 eq of triphenylphosphine

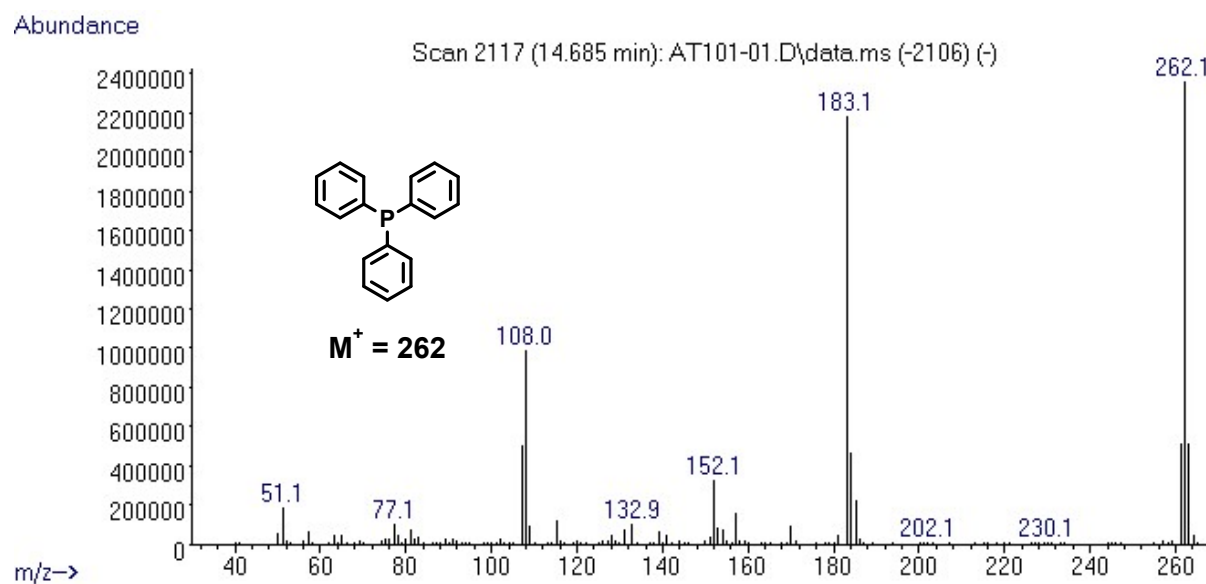

**Figure S109.** MS for triphenylphosphine detected by GC

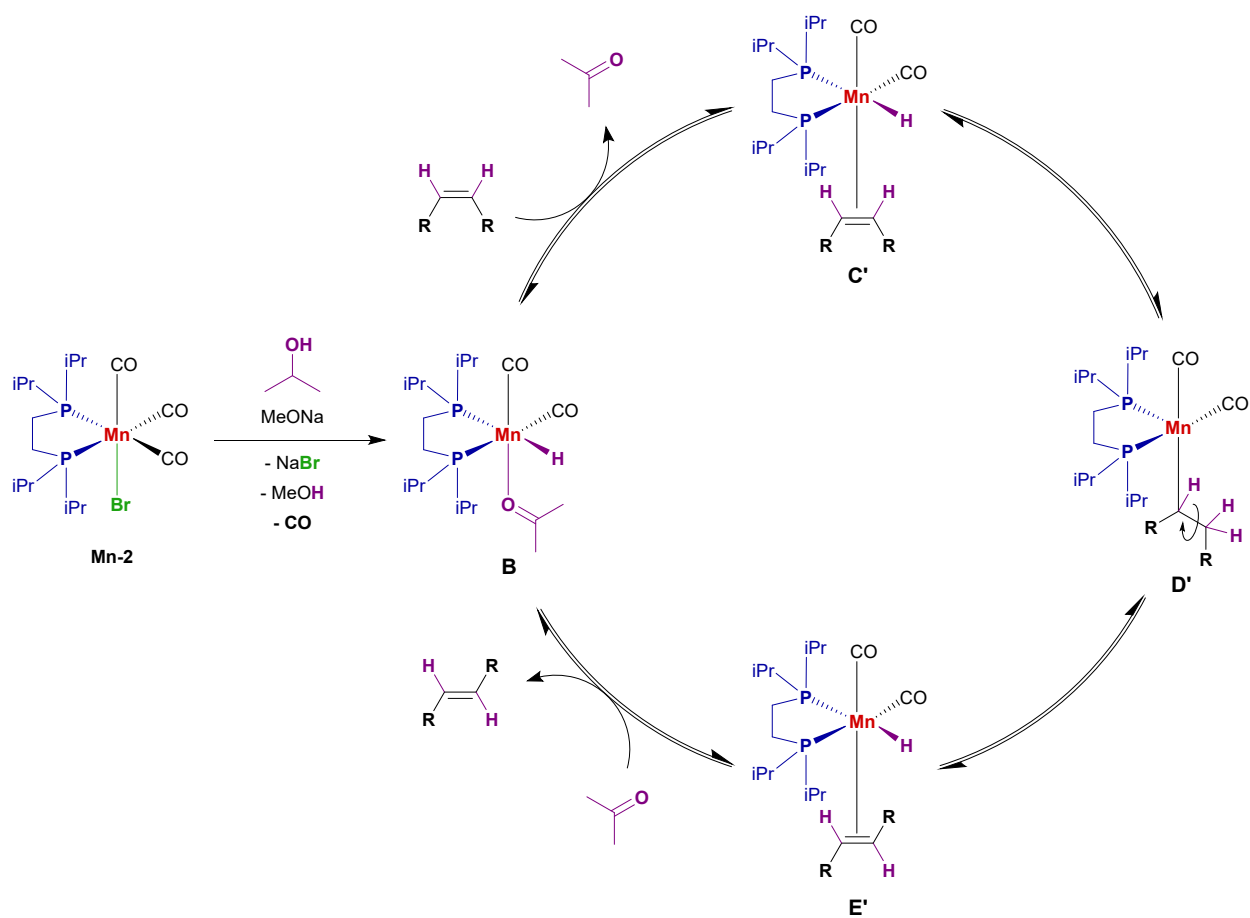

**Scheme S1.** Mechanistic proposal for the Mn-catalyzed reversible isomerization of *Z*- and *E*-alkenes with **Mn-2** as catalytic precursor and *i*PrOH as hydrogen source

*NMR following up of the transfer semihydrogenation of 1 with iPrOH using Mn-2 as catalytic precursor*

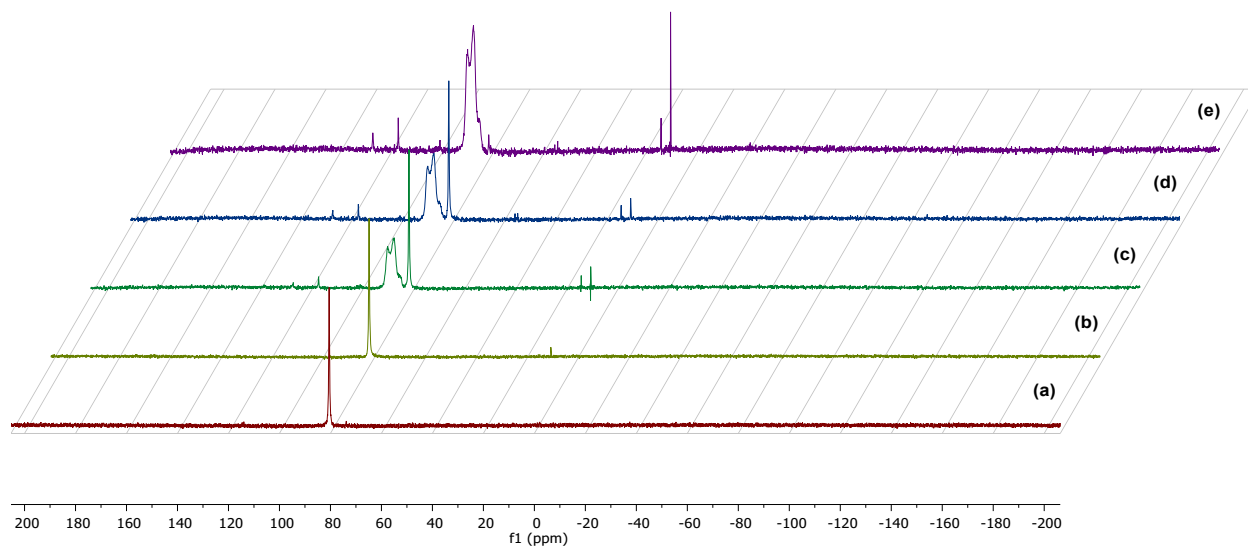

**Figure S110.**  $^{31}\text{P}\{^1\text{H}\}$  NMR (243 MHz,  $\text{THF-}d_8$ ) monitoring of transfer semihydrogenation of **1** with iPrOH catalyzed by **Mn-2**. (a) **Mn-2** and iPrOH; (b) **Mn-2**, iPrOH and MeONa; (c) **b** after heating at 70 °C for 30 min; (d) **c** after addition of **1**; (e) **d** after heating at 70 °C for 30 min. The final molar ratio of **Mn-2**, iPrOH, MeONa and **1** was 1:4:2:1

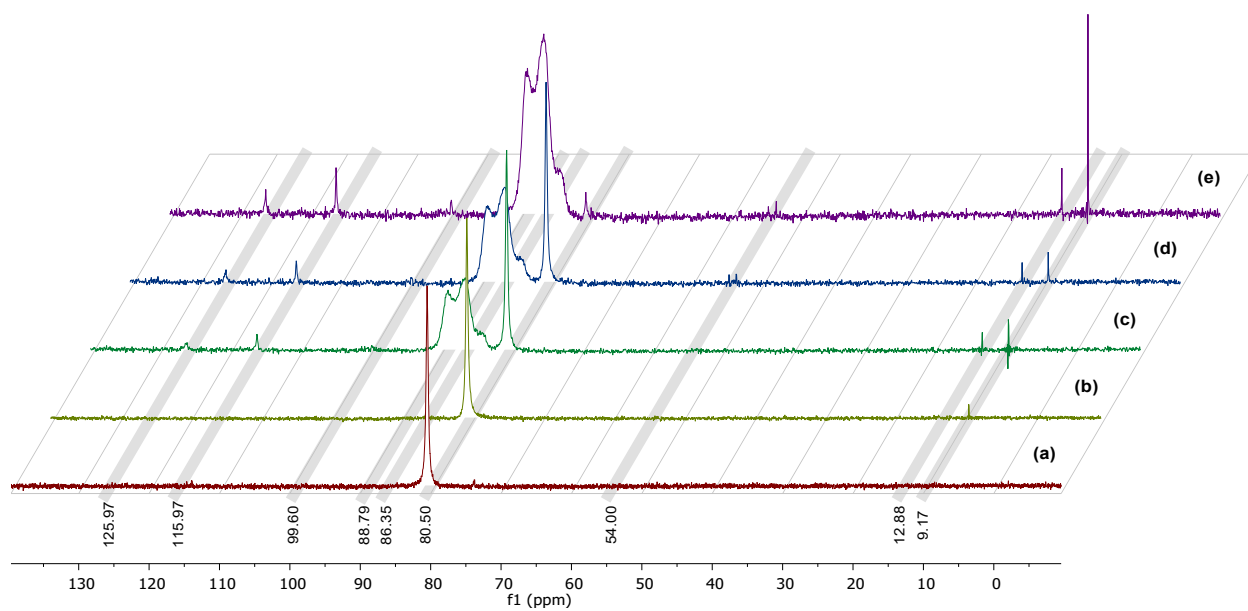

**Figure S111.** Enlargement of  $^{31}\text{P}\{^1\text{H}\}$  NMR (243 MHz,  $\text{THF-}d_8$ ) monitoring of transfer semihydrogenation of **1** with iPrOH catalyzed by **Mn-2**. **(a)** **Mn-2** and iPrOH; **(b)** **Mn-2**, iPrOH and MeONa; **(c)** **b** after heating at 70 °C for 30 min; **(d)** **c** after addition of **1**; **(e)** **d** after heating at 70 °C for 30 min. The final molar ratio of **Mn-2**, iPrOH, MeONa and **1** was 1:4:2:1

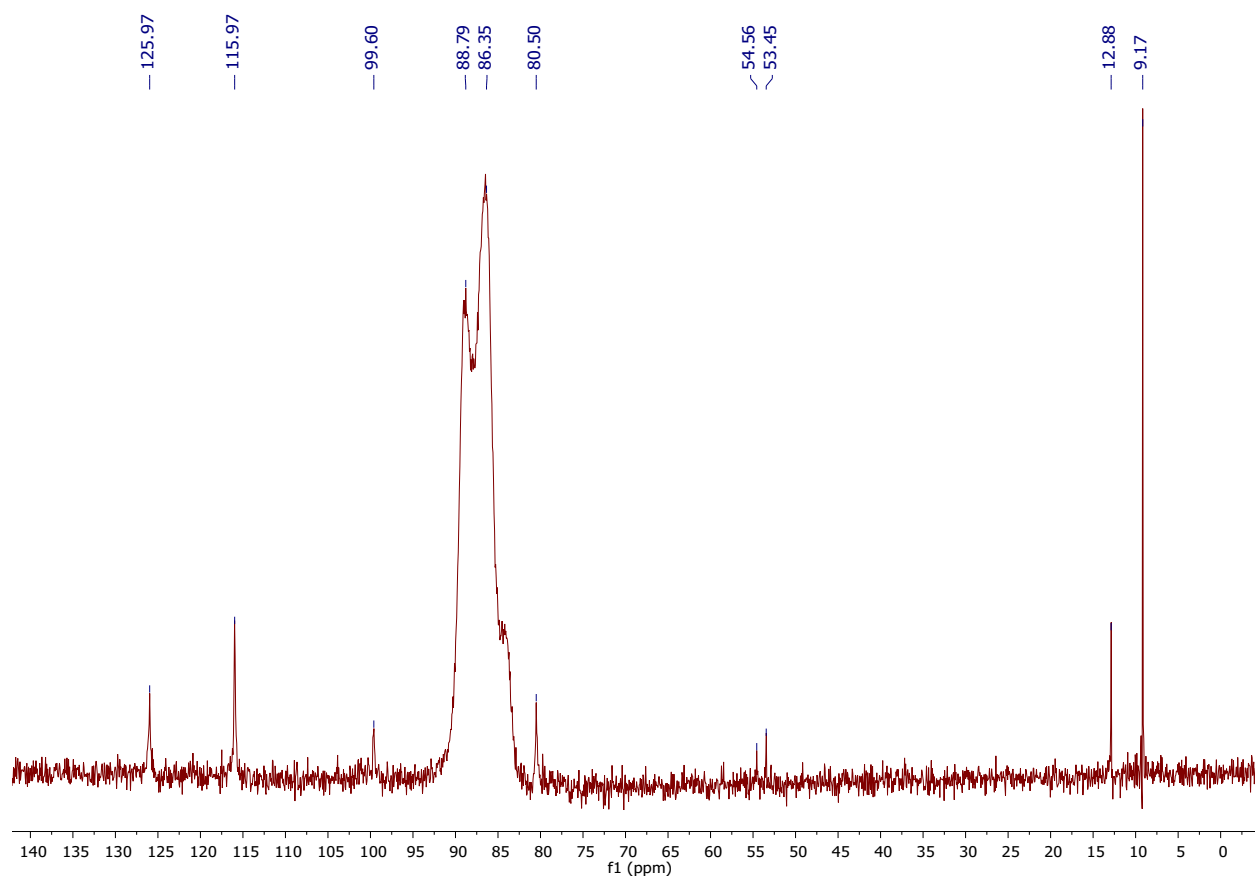

**Figure S112.** Enlargement of  $^{31}\text{P}\{^1\text{H}\}$  NMR (243 MHz,  $\text{THF-}d_8$ ) spectrum of reaction mixture **e**.

The molar ratio of **Mn-2**, iPrOH, MeONa and **1** was 1:4:2:1

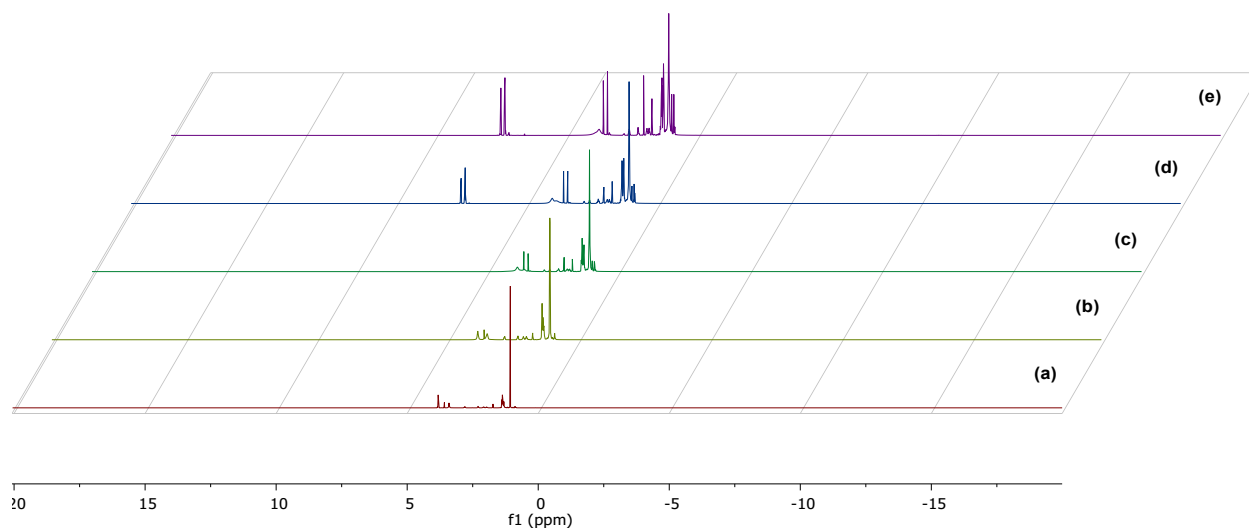

**Figure S113.**  $^1\text{H}$  NMR (600 MHz,  $\text{THF-}d_8$ ) monitoring of transfer semihydrogenation of **1** with  $i\text{PrOH}$  catalyzed by **Mn-2**. **(a)** **Mn-2** and  $i\text{PrOH}$ ; **(b)** **Mn-2**,  $i\text{PrOH}$  and  $\text{MeONa}$ ; **(c)** **b** after heating at  $70\text{ }^\circ\text{C}$  for 30 min; **(d)** **c** after addition of **1**; **(e)** **d** after heating at  $70\text{ }^\circ\text{C}$  for 30 min. The final molar ratio of **Mn-2**,  $i\text{PrOH}$ ,  $\text{MeONa}$  and **1** was 1:4:2:1

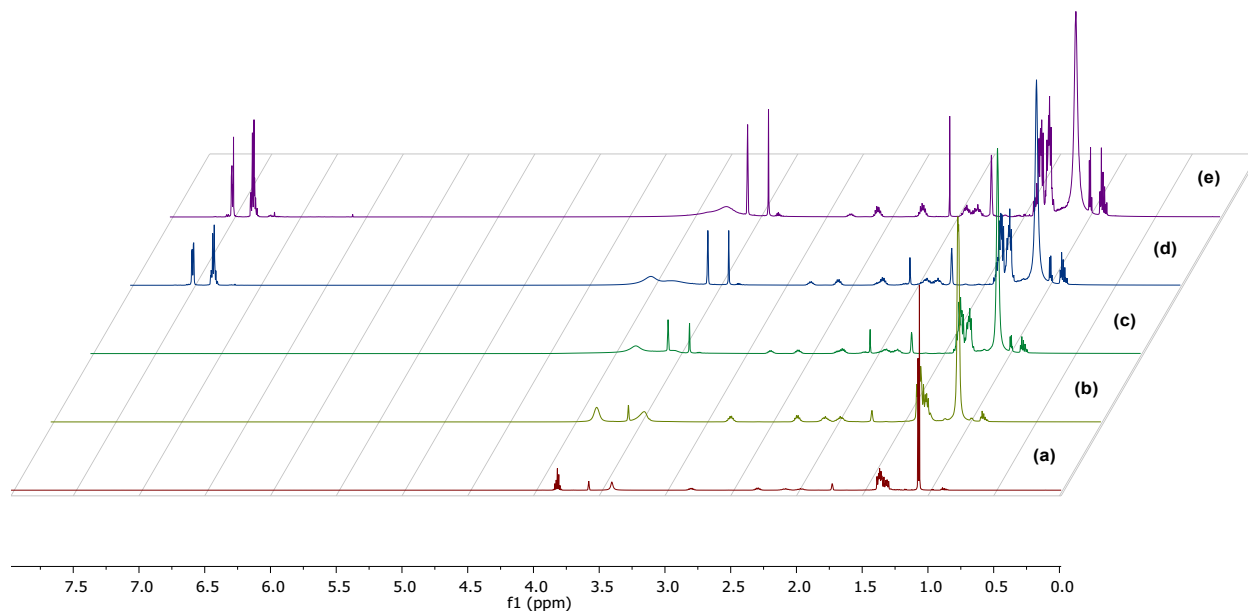

**Figure S114.** Enlargement of non-hydride region of the  $^1\text{H}$  NMR (600 MHz,  $\text{THF-}d_8$ ) monitoring of transfer semihydrogenation of **1** with iPrOH catalyzed by **Mn-2**. (a) **Mn-2** and iPrOH; (b) **Mn-2**, iPrOH and MeONa; (c) **b** after heating at 70 °C for 30 min; (d) **c** after addition of **1**; (e) **d** after heating at 70 °C for 30 min. The final molar ratio of **Mn-2**, iPrOH, MeONa and **1** was 1:4:2:1

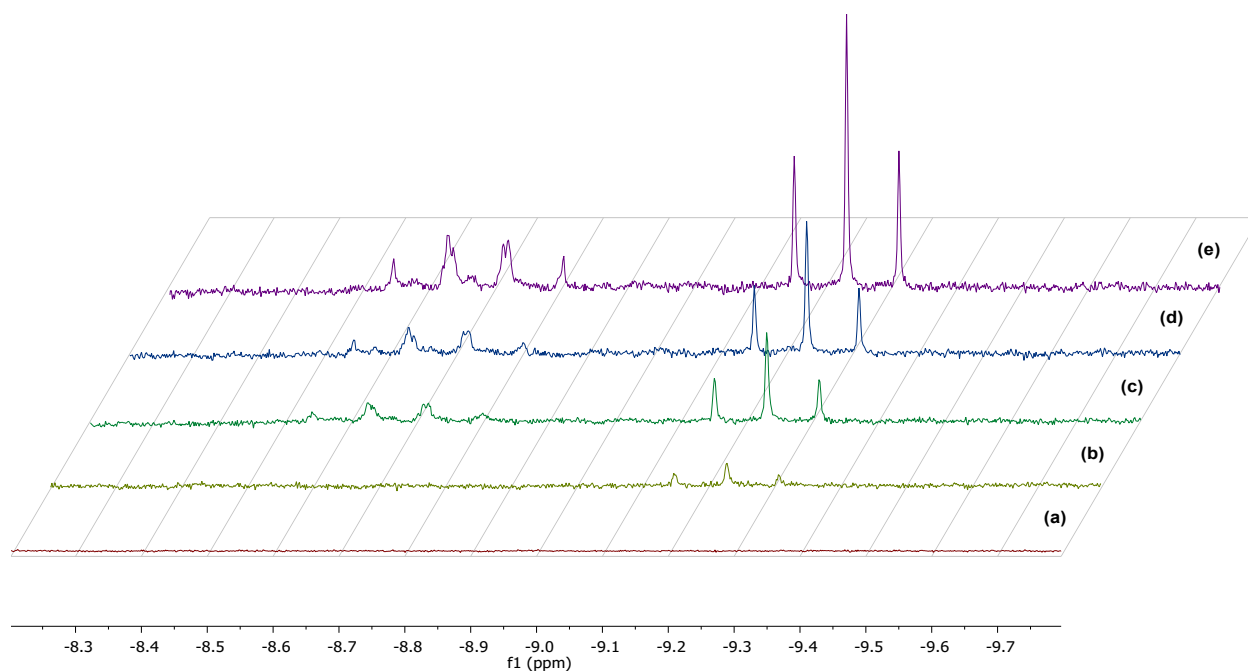

**Figure S115.** Enlargement of hydride region of the  $^1\text{H}$  NMR (600 MHz,  $\text{THF-}d_8$ ) monitoring of transfer semihydrogenation of **1** with iPrOH catalyzed by **Mn-2**. (a) **Mn-2** and iPrOH; (b) **Mn-2**, iPrOH and MeONa; (c) **b** after heating at 70 °C for 30 min; (d) **c** after addition of **1**; (e) **d** after heating at 70 °C for 30 min. The final molar ratio of **Mn-2**, iPrOH, MeONa and **1** was 1:4:2:1

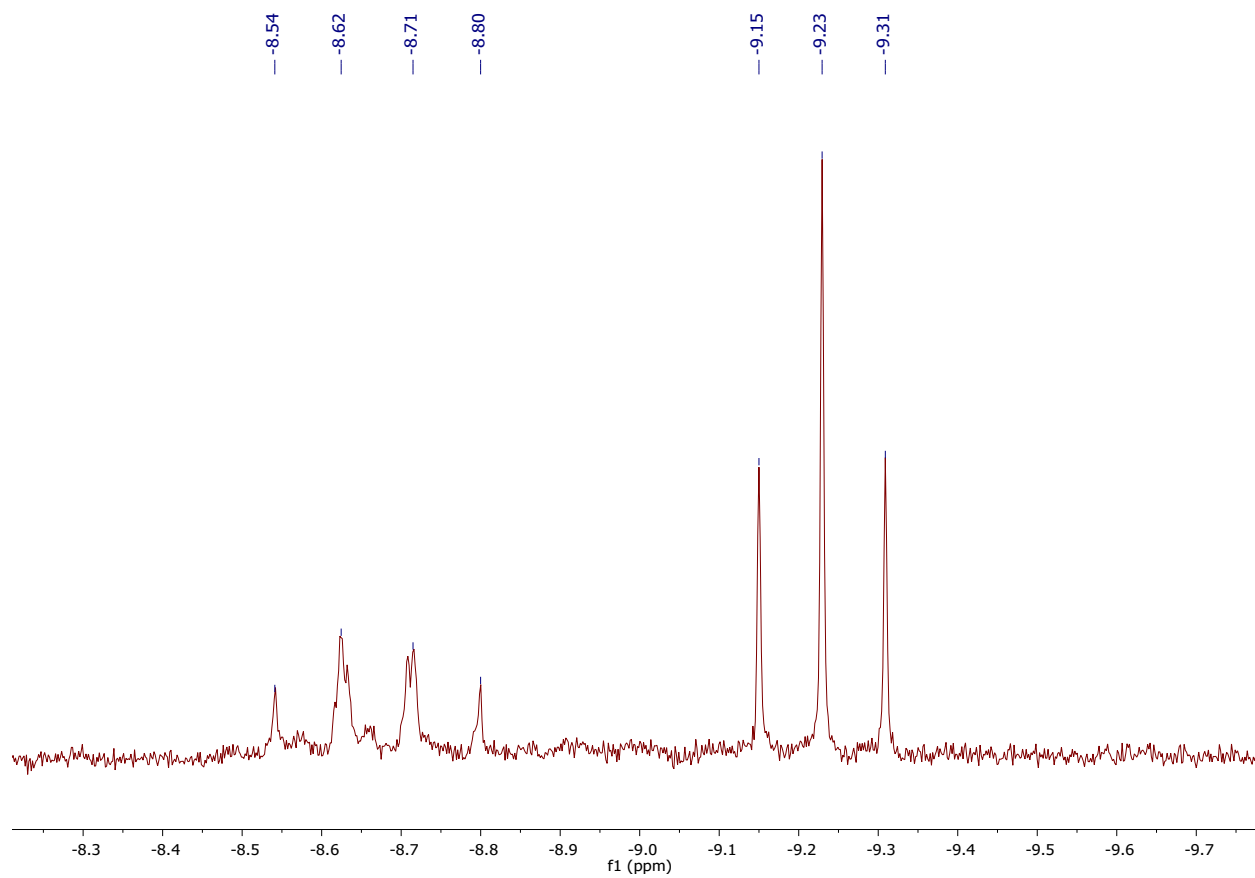

**Figure S116.** Enlargement of hydride region of the  $^1\text{H}$  NMR (600 MHz,  $\text{THF-}d_8$ ) spectrum of reaction mixture **e**. The molar ratio of **Mn-2**,  $i\text{PrOH}$ ,  $\text{MeONa}$  and **1** was 1:4:2:1

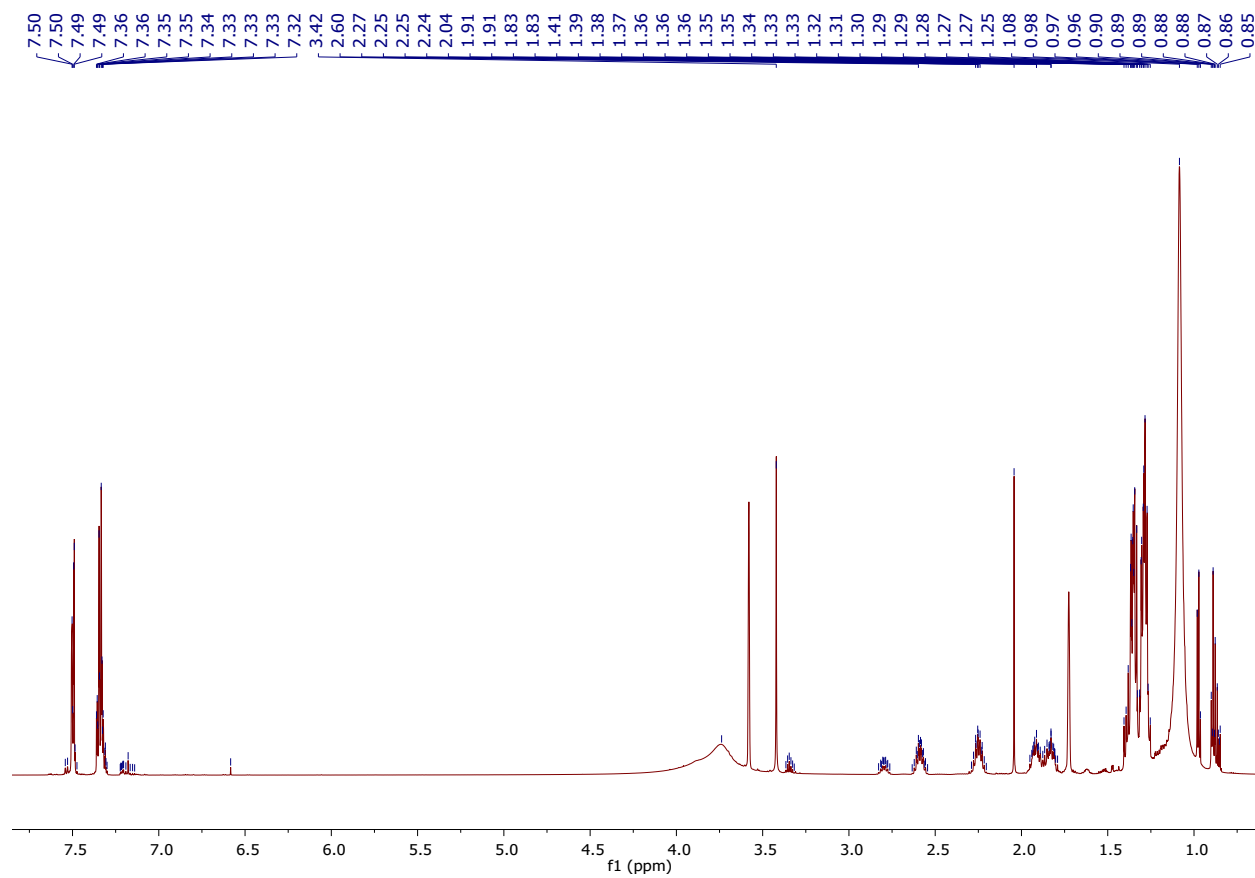

**Figure 117.** Enlargement of non-hydride region of the  $^1\text{H}$  NMR (600 MHz,  $\text{THF-}d_8$ ) spectrum of reaction mixture **e**. The molar ratio of **Mn-2**,  $i\text{PrOH}$ ,  $\text{MeONa}$  and **1** was 1:4:2:1
